# Supplementary material for: Genomic analyses of 10,376 individuals in the Westlake BioBank for Chinese (WBBC) pilot project
Source: Research Square preprint supplement (doi:10.21203/rs.3.rs-814288/v1), 2021-08-26
Supplement: Supplementary file 1 [file f0f5cdfcd79df73ac673b172.xlsx]

## Sheet: Contents
Supplementary Tables: Genomic analyses of 10,376 individuals in the Westlake BioBank for Chinese (WBBC) pilot project
Table 1	Geographic distribution of all the WBBC cohort samples. The individuals were recruited from 29 of the 34 administrative divisions of the People's Republic of China (PRC)
Table 2	Summary of autosomal variants in each individual in the WBBC cohort
Table 3	Statistics of variants in 4,480 individuals
Table 4	Top 50 of phenotypes and number of variants of the allele frequency difference between WBBC and EUR in the NHGRI-EBI Catalog database
Table 5	Comparison of the difference of variants allele frequency between WBBC and 1000 Genome Project population
Table 6	Comparison of the difference of variants allele frequency between WBBC and East Asian population
Table 7	Average number of autosomal variants in each genome of four regions
Table 8	The pathogenic and likely pathogenic variants were recorded by Clinvar in the 1,151 healthy individuals
Table 9	SNVs with significant selection signatures by SDS analysis in the Han Chinese population
Table 10	Pair-wise Fst values for 27 provinces of China in WBBC
Table 11	Pair-wise Fst values for 26 populations in 1KG Phase3 and four regions of China in WBBC
Table 12	Pair-wise Fst values for 27 provinces of China in WBBC and four continent groups in 1KG Phase3
Table 13	Top 1% of non-overlapping genomic windows was identified for positive selection in the North Han Chinese population using the iHS statistic
Table 14	Top 1% of non-overlapping genomic windows was identified for positive selection in the Central Han Chinese population using the iHS statistic
Table 15	Top 1% of non-overlapping genomic windows was identified for positive selection in the South Han Chinese population using the iHS statistic
Table 16	Top 1% of non-overlapping genomic windows was identified for positive selection in the Lingnan Han Chinese population using the iHS statistic
Table 17	Gene Ontology (GO) analysis of candidate genes in top 1% genomic regions with positive selection by iHS statistic
Table 18	KEGG enrichment pathway for candidate genes in top 1% genomic regions with positive selection by iHS statistic

## Sheet: Table 1
Supplementary Table 1. Geographic distribution of all the WBBC cohort samples. The individuals were recruited from 29 of the 34 administrative divisions of the People's Republic of China (PRC)
Regions	Provinces	Number of samples for WGS		Number of samples for SNP-array		Total
		Male	Female	Male	Female
	Gansu	11	30	23	58	122
	Hebei	5	11	18	41	75
	Heilongjiang	7	6	15	25	53
	Henan	11	13	28	60	112
North	Inner Mongolia	6	10	18	22	56
(3621)	Jilin	2	11	15	30	58
	Liaoning	1	0	6	17	24
	Ningxia	7	16	8	27	58
	Qinghai	5	17	10	13	45
	Shaanxi	7	15	12	25	59
	Shandong	8	12	1066	1735	2821
	Shanxi	7	21	22	59	109
	Tianjin	0	0	9	7	16
	Tibet	0	1	0	0	1
	Xinjiang	4	5	1	2	12
Central	Anhui	13	28	28	59	128
(173)	Jiangsu	4	6	10	25	45
	Chongqing	3	12	8	20	43
	Fujian	6	51	17	58	132
	Guizhou	12	18	46	53	129
	Hubei	5	12	9	12	38
South	Hunan	1567	1636	4	5	3212
(6397)	Jiangxi	304	415	425	1305	2449
	Sichuan	13	26	26	57	122
	Yunnan	3	30	29	59	121
	Zhejiang	19	27	37	68	151
Lingnan	Guangdong	8	18	9	14	49
(185)	Guangxi	13	23	11	47	94
	Hainan	0	14	7	21	42
Total		2051	2484	1917	3924	10376

## Sheet: Table 2
Supplementary Table 2. Summary of autosomal variants in each individual in the WBBC cohort
sample ID	Data size(G)	Depth(X)	Coverage	SNVs	INDELs	Singletons	Ts/Tv
hn0001	31.32	10.43	0.9964	2904394	141598	8571	2.15
hn0002	31.56	10.52	0.9968	2918886	141359	8686	2.15
hn0003	31.53	10.53	0.9969	2923696	144270	9303	2.15
hn0004	32.06	10.66	0.9898	2920233	141297	8016	2.16
hn0005	31.71	10.52	0.9966	2909805	142570	7992	2.15
hn0006	32.18	10.75	0.9968	2914298	146217	8756	2.15
hn0007	33.01	11.05	0.9898	2914300	147116	10325	2.15
hn0008	33.45	11.19	0.9899	2908561	144469	8260	2.15
hn0009	32.04	10.72	0.9901	2904561	143731	7787	2.15
hn0010	32.6	10.92	0.9901	2902029	143996	7871	2.15
hn0011	37.61	12.57	0.9973	2925904	155574	8882	2.15
hn0012	30.77	10.42	0.9901	2914964	142845	8055	2.15
hn0013	36.71	12.41	0.9973	2943350	157412	8983	2.15
hn0014	33.48	11.32	0.9972	2928451	149563	9013	2.15
hn0015	32.22	10.89	0.997	2910343	146454	7400	2.15
hn0016	30.12	10.19	0.9965	2910174	142583	8018	2.15
hn0017	39.63	13.41	0.9903	2932264	157924	9002	2.15
hn0018	33.14	11.17	0.9971	2915075	147260	8153	2.15
hn0019	33.42	11.32	0.9903	2921031	148316	8311	2.15
hn0021	43.17	14.57	0.9975	2930646	164537	10602	2.15
hn0022	33.17	11.21	0.9973	2925986	149298	9353	2.15
hn0023	32.54	11	0.9901	2917163	146189	8002	2.15
hn0024	31.1	10.54	0.9896	2914260	143628	11880	2.15
hn0026	30.93	10.45	0.9968	2907237	141761	8417	2.15
hn0027	33.47	11.32	0.9972	2934366	150231	1461	2.15
hn0028	34.11	11.54	0.9973	2923676	151008	12228	2.15
hn0029	31.19	10.56	0.9966	2904300	144125	8405	2.15
hn0030	45.98	15.54	0.9905	2925459	165161	8834	2.15
hn0031	32.79	11.09	0.9965	2916391	147273	8591	2.15
hn0032	36.07	12.21	0.9902	2929245	152740	8411	2.15
hn0033	42.4	14.37	0.9978	2945089	162325	9002	2.15
hn0034	41.23	13.95	0.9904	2940103	161473	8867	2.15
hn0035	34.81	11.77	0.9973	2921474	152060	9154	2.15
hn0036	31.04	10.51	0.9895	2911487	143668	8464	2.15
hn0037	36.31	12.3	0.99	2923292	152927	10580	2.15
hn0038	32.01	10.72	0.997	2919741	145936	8509	2.15
hn0039	33.36	11.18	0.9901	2925101	148439	12894	2.15
hn0040	31.64	10.73	0.9897	2914307	145127	7857	2.15
hn0041	40.36	13.63	0.9975	2946412	161853	8639	2.15
hn0042	33.04	11.17	0.9972	2919374	148232	8347	2.15
hn0043	33.22	11.23	0.9969	2929548	149263	8419	2.15
hn0044	32.52	11.01	0.9969	2929558	148792	7740	2.15
hn0045	40.32	13.66	0.9977	2937180	161980	9828	2.15
hn0046	33.63	11.38	0.9969	2925462	148878	8585	2.15
hn0047	32.28	10.92	0.9899	2927239	146468	8242	2.15
hn0049	37.84	12.78	0.9974	2931039	156769	8205	2.15
hn0050	33.09	11.19	0.9901	2926807	146012	10165	2.15
hn0051	35.17	11.88	0.9903	2918489	151294	9936	2.15
hn0052	38.15	12.89	0.9973	2921657	157034	8493	2.15
hn0053	31.93	10.81	0.99	2918633	145625	8764	2.15
hn0054	42.7	14.44	0.9905	2947192	164378	8969	2.15
hn0055	30.06	10.16	0.9898	2904901	140121	7817	2.16
hn0056	33.63	11.39	0.9971	2916383	149426	9852	2.15
hn0057	38.47	12.98	0.9975	2921281	155874	9267	2.15
hn0058	40.88	13.82	0.9976	2925961	161375	8799	2.15
hn0059	33.86	11.47	0.9901	2905080	147268	8405	2.15
hn0060	32	10.84	0.9899	2917806	145798	8901	2.15
hn0061	37.4	12.67	0.9902	2920262	154983	9025	2.15
hn0062	33.05	11.17	0.997	2929523	148570	8502	2.15
hn0063	31.65	10.73	0.9898	2912956	145741	8452	2.15
hn0064	31.69	10.74	0.9971	2919464	146091	8324	2.15
hn0065	39.68	13.42	0.9976	2926290	159665	9593	2.15
hn0066	32.9	11.16	0.9901	2922622	148453	9772	2.15
hn0067	30.48	10.32	0.9968	2907519	143216	7034	2.15
hn0068	30.39	10.3	0.9899	2915390	141374	8158	2.15
hn0069	39.4	13.33	0.9902	2930099	157414	10055	2.15
hn0070	35.79	12.11	0.9901	2927351	152295	9213	2.15
hn0071	31.98	10.83	0.9899	2925552	146067	8725	2.15
hn0072	31.75	10.75	0.9898	2919165	144139	8138	2.15
hn0073	37.3	12.63	0.9902	2932004	153512	8659	2.15
hn0074	30.76	10.4	0.9969	2909824	141842	5695	2.15
hn0076	35.23	11.93	0.9902	2919715	151626	8792	2.15
hn0077	33.09	11.19	0.9898	2920377	147130	8739	2.15
hn0078	42.35	14.33	0.9902	2933031	162025	9251	2.15
hn0079	30.13	10.21	0.9896	2910164	140971	7599	2.15
hn0080	34.22	11.59	0.9898	2919568	148301	9436	2.15
hn0081	40.96	13.86	0.9974	2931776	161057	9855	2.15
hn0082	41.5	14.04	0.9904	2935932	159977	8685	2.15
hn0083	33.6	11.38	0.9898	2912051	147393	11998	2.16
hn0084	38.92	13.15	0.9902	2941809	158783	8716	2.15
hn0085	47.07	15.87	0.9978	2921474	169009	9111	2.15
hn0086	35.96	12.15	0.9904	2924163	152969	8523	2.15
hn0087	40.59	13.73	0.9903	2939530	160337	9129	2.15
hn0088	40.33	13.67	0.9976	2936367	162211	9295	2.15
hn0089	43.2	14.61	0.9905	2940234	163666	5876	2.15
hn0090	35.9	12.13	0.9973	2890222	151667	8520	2.15
hn0092	35.17	11.9	0.9972	2941315	154255	9027	2.15
hn0093	41.47	14.04	0.9904	2935450	162602	9131	2.15
hn0094	35.63	12.06	0.9902	2931158	151799	11730	2.15
hn0095	35.18	11.89	0.9971	2925532	150883	7851	2.15
hn0096	35.95	12.17	0.99	2936532	151593	8191	2.15
hn0097	34.19	11.56	0.9971	2909001	148515	8592	2.15
hn0098	35.41	11.96	0.9901	2931428	149469	1512	2.15
hn0099	32.38	10.96	0.9901	2913039	145942	8080	2.15
hn0100	38.55	13.05	0.9902	2926249	157060	8499	2.15
hn0101	34.13	11.55	0.9971	2926311	151713	9253	2.15
hn0102	34.61	11.68	0.9974	2916879	149065	8600	2.15
hn0103	37.54	12.68	0.9974	2946402	155852	8657	2.15
hn0104	42.53	14.34	0.9979	2936863	162422	9247	2.16
hn0105	46.09	15.6	0.9907	2946809	166165	9123	2.15
hn0107	40.59	13.57	0.9905	2934969	159693	8790	2.15
hn0108	35.46	11.9	0.9901	2925868	152056	8917	2.15
hn0109	38.01	12.72	0.9975	2940489	158465	9143	2.15
hn0110	36.74	12.3	0.9973	2925831	154373	5082	2.15
hn0111	42.55	14.2	0.9906	2932107	161126	8474	2.15
hn0112	34.12	11.44	0.9903	2923928	149498	8050	2.15
hn0113	35.33	11.81	0.9973	2934871	153145	9642	2.15
hn0114	34.41	11.5	0.99	2911171	149651	8279	2.15
hn0115	43.86	14.67	0.9978	2953329	165531	10925	2.15
hn0116	39.07	13.01	0.9977	2928926	157235	8793	2.15
hn0117	38.25	12.74	0.9903	2935276	155812	8629	2.15
hn0118	34.9	11.66	0.9903	2920341	150475	8301	2.15
hn0119	40.52	13.46	0.9979	2915428	158901	6551	2.15
hn0120	36.2	12.06	0.9903	2937213	153911	8402	2.16
hn0121	32.29	10.77	0.997	2911134	146458	8353	2.15
hn0122	37.02	12.32	0.9904	2920590	153918	8393	2.15
hn0123	36.01	11.98	0.9974	2942695	154227	8543	2.15
hn0124	43.4	14.4	0.9977	2948506	165298	9304	2.15
hn0125	35.88	11.95	0.9902	2929181	152990	9103	2.16
hn0126	37.6	12.52	0.9902	2924588	155305	10397	2.15
hn0127	44.17	14.69	0.9904	2920073	163526	8533	2.15
hn0128	42.14	13.98	0.9977	2919476	161943	9810	2.15
hn0129	40.59	13.6	0.9976	2948441	161695	9192	2.15
hn0130	33.99	11.37	0.9898	2921409	149628	8196	2.15
hn0131	37.87	12.66	0.9901	2927548	156468	9179	2.15
hn0132	31.57	10.58	0.9901	2916117	143922	8417	2.15
hn0133	35.1	11.79	0.9903	2925677	151182	8639	2.15
hn0134	33.31	11.2	0.9969	2920069	150153	9401	2.15
hn0135	41.6	13.91	0.9976	2942672	162278	10498	2.15
hn0136	33.32	11.23	0.99	2924353	149263	4604	2.15
hn0137	32.56	10.96	0.9969	2924680	148663	8427	2.15
hn0138	30.2	10.1	0.9968	2914389	143059	7572	2.15
hn0139	41.08	13.73	0.9902	2946276	162206	8674	2.15
hn0140	36.37	12.16	0.9905	2915852	152670	5525	2.15
hn0141	34.91	11.68	0.9972	2927117	151713	8542	2.15
hn0142	33.21	11.13	0.9902	2915587	146614	8181	2.15
hn0143	38.27	12.76	0.9974	2910550	155900	8958	2.15
hn0144	32.61	10.88	0.997	2916507	144833	9598	2.15
hn0145	31.09	10.25	0.9899	2892444	141088	7511	2.15
hn0146	37.22	12.49	0.9976	2935060	156946	8398	2.15
hn0147	33.7	11.34	0.9972	2925735	150584	8322	2.15
hn0148	44.9	15.17	0.9975	2930578	166914	8787	2.15
hn0149	33.87	11.44	0.9899	2929703	149996	8447	2.15
hn0150	35.24	11.91	0.9974	2922856	152276	9103	2.15
hn0151	43.04	14.52	0.9902	2941013	163395	9055	2.15
hn0152	41.89	14.09	0.9975	2935134	163182	9296	2.15
hn0153	36.63	12.34	0.9975	2931273	154667	8669	2.15
hn0154	34.85	11.75	0.9902	2911842	150254	10523	2.15
hn0155	39.13	13.17	0.9977	2944985	159581	9986	2.15
hn0156	31.02	10.46	0.9897	2841256	139764	7469	2.15
hn0157	34.77	11.71	0.9901	2926457	150567	8423	2.15
hn0158	33.91	11.43	0.9897	2932652	150219	9383	2.15
hn0159	39.12	13.13	0.9977	2925385	156806	9075	2.15
hn0160	34.93	11.78	0.9899	2930078	152372	8522	2.15
hn0161	33.11	11.16	0.9901	2933379	147722	7963	2.15
hn0162	33.01	11.17	0.9898	2914912	147213	8154	2.15
hn0163	41.98	14.17	0.9901	2934922	161049	8678	2.15
hn0164	36.07	12.18	0.9903	2920888	152148	8149	2.15
hn0165	34.18	11.55	0.9901	2930247	149770	9761	2.15
hn0166	34.12	11.49	0.9973	2918487	148922	9386	2.15
hn0167	38.63	13	0.9977	2929670	157282	9107	2.15
hn0168	33.02	11.14	0.9969	2926383	147467	11489	2.16
hn0169	33.35	11.28	0.9898	2925906	149054	8443	2.15
hn0170	40.18	13.54	0.9903	2929435	160242	9088	2.15
hn0171	33.99	11.5	0.9901	2924579	152033	13474	2.15
hn0172	44.7	15.1	0.9904	2943963	165819	9299	2.15
hn0173	33.73	11.39	0.99	2917143	148391	8550	2.15
hn0174	34.49	11.66	0.99	2909904	149056	8490	2.15
hn0175	41.53	13.86	0.9976	2935585	160645	10515	2.15
hn0176	40.93	13.8	0.9905	2912432	159805	8975	2.15
hn0177	38.11	12.88	0.99	2931741	155519	9204	2.15
hn0178	33.58	11.36	0.9902	2912461	148294	8114	2.15
hn0179	41.64	14.04	0.9974	2935908	162778	9101	2.15
hn0180	31.96	10.8	0.9899	2909738	144511	8404	2.16
hn0181	34.55	11.68	0.9903	2912873	149919	11545	2.15
hn0182	34.71	11.74	0.9902	2925492	151336	8574	2.15
hn0183	40.66	13.73	0.9974	2943502	160938	8959	2.15
hn0184	33.85	11.44	0.9902	2912494	147995	8621	2.15
hn0185	33.56	11.35	0.9972	2929080	150326	8596	2.15
hn0186	32.89	11.11	0.9971	2920566	148077	8296	2.15
hn0187	42.01	14.2	0.9903	2927039	160204	9448	2.15
hn0188	38.95	13.15	0.9973	2939593	158451	9129	2.15
hn0189	36.07	12.19	0.9973	2921311	153662	9158	2.15
hn0190	34.46	11.64	0.9901	2916050	148942	8351	2.15
hn0191	37.11	12.55	0.99	2908034	152803	8887	2.15
hn0192	34.64	11.7	0.9899	2908637	147622	8548	2.15
hn0194	39.16	13.22	0.9902	2926972	158676	9051	2.15
hn0195	34.73	11.74	0.9902	2919922	150208	8325	2.15
hn0196	44.52	14.97	0.9977	2934029	165025	9126	2.15
hn0197	32.41	10.94	0.9968	2925873	147636	8312	2.15
hn0198	39.1	13.14	0.9974	2925151	157889	8924	2.15
hn0199	46.7	15.72	0.9903	2959184	168939	12317	2.15
hn0200	40.23	13.57	0.9976	2948551	161391	8698	2.15
hn0201	36.71	12.44	0.9901	2932457	154848	9111	2.15
hn0202	34.19	11.55	0.9899	2928000	150540	8498	2.15
hn0203	33.26	11.26	0.9971	2908483	148902	8317	2.15
hn0204	41.43	13.99	0.9975	2924547	161766	9028	2.15
hn0205	37.44	12.63	0.9903	2924233	155347	9500	2.15
hn0206	37.54	12.66	0.9901	2926024	155257	1599	2.15
hn0207	35.64	12.05	0.99	2929366	152197	8505	2.15
hn0208	39.95	13.5	0.9905	2938028	159562	9503	2.15
hn0209	36.11	12.19	0.9972	2921605	152703	1148	2.15
hn0210	35.84	12.12	0.9901	2925195	153736	8584	2.15
hn0211	38.47	13.02	0.9903	2932353	158012	8789	2.15
hn0212	34.21	11.59	0.9902	2921709	150396	10625	2.15
hn0213	42.9	14.5	0.9903	2927900	162597	10416	2.15
hn0214	34.4	11.63	0.9902	2924024	151233	8526	2.15
hn0215	36.74	12.4	0.9974	2923689	155452	10604	2.15
hn0216	41.53	14.05	0.9978	2937854	162101	9264	2.15
hn0217	46.63	15.71	0.9975	2919925	167187	9162	2.15
hn0218	41.81	14.14	0.9905	2952372	164368	2894	2.15
hn0219	35.38	11.97	0.99	2930395	153576	8615	2.15
hn0220	37.18	12.55	0.9975	2919829	155451	9241	2.15
hn0222	36.26	12.27	0.9975	2934159	156325	12367	2.15
hn0223	35.17	11.9	0.9901	2924328	151725	8706	2.15
hn0224	41.68	14.09	0.9905	2932058	162230	8807	2.15
hn0225	38.03	12.85	0.99	2934501	158096	9425	2.15
hn0226	37.06	12.53	0.9903	2931686	155388	12762	2.15
hn0227	33.81	11.44	0.9973	2932693	151707	8420	2.16
hn0228	42.16	14.22	0.9905	2950560	163088	9006	2.15
hn0229	38.46	13	0.9974	2937664	158912	8703	2.15
hn0230	38.2	12.9	0.9975	2940272	159187	9182	2.15
hn0231	36.32	12.29	0.9901	2918886	153537	11960	2.15
hn0232	42.29	14.3	0.9904	2938186	163459	11206	2.15
hn0233	36.72	12.39	0.9902	2928940	153935	8801	2.15
hn0234	36.74	12.4	0.9972	2930160	155791	9928	2.15
hn0235	36.59	12.35	0.9973	2928754	156252	12778	2.15
hn0236	31.6	10.68	0.9896	2919927	145301	8626	2.15
hn0237	43.75	14.77	0.9978	2938826	164468	9659	2.15
hn0238	34.56	11.68	0.9971	2923300	151798	8559	2.15
hn0239	36.02	12.18	0.9902	2931066	154185	8810	2.15
hn0240	42.56	14.39	0.9904	2924030	163023	9864	2.15
hn0241	45.41	15.33	0.9904	2939402	166113	9557	2.15
hn0242	39.13	13.23	0.9902	2931857	159066	13353	2.15
hn0243	35.47	12	0.9971	2937052	155115	8724	2.15
hn0244	37.29	12.61	0.9976	2931244	156885	8841	2.15
hn0245	32.86	11.12	0.9969	2925654	149621	8299	2.15
hn0246	35.69	12.08	0.9902	2931248	154275	9052	2.15
hn0247	36.09	12.23	0.9974	2917779	154130	9374	2.15
hn0248	41.54	14.03	0.9902	2930305	162159	12178	2.15
hn0249	37.33	12.64	0.99	2922143	156180	13671	2.15
hn0250	36.16	12.21	0.9974	2928517	155940	9752	2.15
hn0251	32.58	11.02	0.9969	2913333	148060	8437	2.15
hn0252	49.04	16.58	0.9979	2938052	171900	11856	2.15
hn0253	36	12.17	0.9974	2919576	154325	8828	2.15
hn0254	36.27	12.28	0.9897	2932654	154530	8928	2.15
hn0255	35.53	12.02	0.9974	2932134	154777	8671	2.15
hn0256	39.58	13.39	0.9974	2943616	159977	8798	2.15
hn0257	36.48	12.32	0.9901	2929422	153991	8434	2.15
hn0258	34.7	11.73	0.9903	2919801	151587	8462	2.15
hn0259	38.47	12.99	0.9975	2923872	157617	8794	2.15
hn0260	34.27	11.6	0.9968	2930029	153282	13223	2.15
hn0261	43.64	14.71	0.9905	2926194	163097	9157	2.15
hn0262	33.5	11.34	0.9899	2904092	148424	10900	2.15
hn0263	36.73	12.42	0.9974	2917852	154390	9092	2.15
hn0264	42.05	14.18	0.9976	2943103	165059	14043	2.15
hn0265	45.4	15.32	0.9977	2937428	167143	14350	2.15
hn0266	40.09	13.54	0.9903	2933322	159484	9608	2.15
hn0267	35.09	11.86	0.9898	2919525	151994	8327	2.15
hn0268	36.33	12.28	0.99	2934916	154661	8420	2.15
hn0269	32.66	11.05	0.99	2923506	147088	8058	2.15
hn0270	36.09	12.2	0.9973	2936619	155354	10524	2.15
hn0271	34.5	11.69	0.9901	2943158	152296	4337	2.15
hn0272	39.77	13.43	0.9974	2941046	159733	9281	2.15
hn0273	35.59	12.02	0.9971	2920565	154056	8749	2.15
hn0274	33.51	11.34	0.9972	2927649	150104	12460	2.15
hn0275	30.4	10.28	0.9968	2912255	143779	8354	2.15
hn0276	39.13	13.24	0.9904	2933915	158125	10237	2.15
hn0277	36.53	12.34	0.9973	2926061	154994	10239	2.15
hn0278	34.76	11.75	0.9969	2929086	152219	9319	2.15
hn0279	33.61	11.36	0.9968	2923426	150198	8093	2.15
hn0280	38.14	12.89	0.9903	2926150	156257	5194	2.15
hn0281	35.3	11.92	0.9902	2933380	152701	9516	2.15
hn0282	34.42	11.62	0.9902	2924299	150552	8738	2.15
hn0283	33.92	11.47	0.99	2918920	148446	8480	2.15
hn0284	31.61	10.69	0.9899	2911023	144000	8066	2.15
hn0285	42.07	14.22	0.9905	2930397	161675	8981	2.15
hn0286	31.72	10.73	0.9898	2894223	144154	8348	2.15
hn0288	40.02	13.52	0.9976	2924439	159574	8985	2.15
hn0289	35.97	12.05	0.9974	2925395	151879	8886	2.15
hn0290	40.54	13.51	0.9977	2934854	158825	10393	2.15
hn0291	33.76	11.29	0.9899	2928065	147092	7860	2.15
hn0292	37.75	12.63	0.9904	2945841	154855	9895	2.15
hn0294	45.64	15.25	0.9905	2927507	163395	8936	2.15
hn0295	38.32	12.87	0.9906	2922220	154555	9351	2.15
hn0296	35.55	11.89	0.9973	2926462	151049	8598	2.15
hn0298	43.41	14.55	0.9907	2921708	148493	9050	2.15
hn0297	33.35	11.13	0.997	2941438	162669	10225	2.15
hn0299	36.04	12	0.997	2920292	150510	8604	2.15
hn0300	36.39	12.17	0.9904	2930022	151513	8241	2.15
hn0301	34.74	11.62	0.9903	2919960	147595	8561	2.15
hn0302	39.65	13.2	0.9976	2909244	156921	8331	2.15
hn0303	37.11	12.41	0.9904	2921341	151860	8834	2.15
hn0304	37.28	12.37	0.9906	2924714	152511	8701	2.16
hn0305	37.49	12.49	0.9975	2937029	154680	8937	2.15
hn0306	35.56	11.91	0.9972	2915824	150965	8328	2.15
hn0307	42.25	14.09	0.9976	2931341	161018	8677	2.15
hn0308	33.62	11.23	0.9901	2919154	147221	11717	2.15
hn0309	36.89	12.33	0.9975	2928433	153583	8495	2.15
hn0310	41.04	13.75	0.9905	2927626	158276	8405	2.15
hn0311	43.47	14.56	0.9905	2934509	161692	13373	2.15
hn0312	41.53	13.86	0.9976	2932637	159820	11396	2.15
hn0313	36.57	12.24	0.9903	2918261	152492	1264	2.15
hn0314	38.96	12.99	0.9902	2925375	156238	12421	2.15
hn0315	34.46	11.5	0.9973	2926190	150065	8061	2.15
hn0316	36.26	12.13	0.9901	2927715	151737	8259	2.15
hn0317	35.56	11.88	0.9901	2931693	151483	8530	2.15
hn0318	40.64	13.59	0.9904	2926792	158139	11276	2.15
hn0319	37.9	12.71	0.9976	2928326	155790	8845	2.15
hn0320	34.75	11.64	0.9973	2925346	150639	8507	2.15
hn0321	34.72	11.59	0.997	2921418	150520	7609	2.15
hn0322	44	14.74	0.9903	2920578	162430	9388	2.15
hn0323	38	12.72	0.9977	2931657	154544	8421	2.15
hn0327	36.68	12.26	0.9903	2922714	151230	10580	2.15
hn0328	35.5	11.8	0.99	2924884	150822	8382	2.15
hn0329	39.15	13.07	0.9903	2926201	156619	8618	2.15
hn0330	34.28	11.48	0.997	2914999	148510	9509	2.15
hn0331	43.77	14.6	0.9905	2946552	163377	8552	2.15
hn0332	34.04	11.4	0.9901	2916980	147949	8339	2.15
hn0333	37.02	12.39	0.9904	2932765	153721	9035	2.15
hn0334	42.85	14.32	0.9904	2935714	160828	9130	2.15
hn0335	44.52	14.89	0.9906	2938714	164571	9720	2.15
hn0336	41.5	13.88	0.9905	2927014	159827	9309	2.15
hn0337	36.07	12.05	0.9974	2917579	152357	8968	2.15
hn0338	40.67	13.56	0.9905	2931875	158079	8908	2.15
hn0339	34.17	11.33	0.997	2932057	149499	9280	2.15
hn0340	36.94	12.36	0.9903	2939222	153259	6725	2.15
hn0341	35.81	11.98	0.9975	2934197	152585	8836	2.15
hn0342	41.18	13.72	0.9976	2940008	160257	8711	2.15
hn0343	36.45	12.2	0.9972	2917644	153116	8875	2.15
hn0344	33.8	11.29	0.9903	2911624	146653	8493	2.15
hn0346	43.86	14.64	0.9905	2928003	162596	7723	2.15
hn0347	38.25	12.77	0.9973	2931490	155821	8590	2.15
hn0348	35.51	11.87	0.9973	2899815	150181	8023	2.15
hn0349	34.7	11.6	0.9973	2916797	149039	9218	2.15
hn0350	40.33	13.45	0.9974	2916577	157291	8541	2.15
hn0352	34.13	11.28	0.9972	2921759	148551	7547	2.15
hn0353	40.54	13.49	0.9976	2933201	159186	9122	2.15
hn0354	36.46	12.2	0.9974	2931166	154817	8283	2.15
hn0355	43.42	14.47	0.9977	2943422	162965	8872	2.15
hn0356	34.25	11.47	0.9904	2905254	146276	8330	2.15
hn0357	36	12.04	0.9901	2924170	150483	8138	2.16
hn0358	42.12	14.08	0.9905	2922246	159844	7936	2.15
hn0359	44.47	14.83	0.9976	2925138	163237	11502	2.15
hn0360	40.12	13.38	0.9976	2920247	156809	8297	2.15
hn0361	35.17	11.75	0.9971	2945264	153447	8482	2.16
hn0362	38.35	12.78	0.9973	2933619	156009	7664	2.15
hn0363	32.29	10.79	0.9968	2906237	145113	7739	2.15
hn0364	34.02	11.37	0.9902	2915515	147896	7769	2.16
hn0365	33.8	11.31	0.9972	2911164	148143	9032	2.15
hn0367	35.58	11.91	0.9973	2926442	151946	8660	2.15
hn0369	32.85	10.98	0.997	2912983	146237	7980	2.15
hn0370	43.09	14.42	0.9906	2931833	162287	9162	2.15
hn0371	36.15	12.07	0.9904	2923414	151790	8273	2.15
hn0372	34.01	11.37	0.9899	2912825	145811	8488	2.15
hn0373	33.74	11.29	0.997	2908896	147116	8255	2.15
hn0374	39.5	13.16	0.9904	2927701	156509	9055	2.15
hn0375	33.81	11.22	0.9902	2924396	146206	7918	2.15
hn0376	30.76	10.09	0.9964	2902589	140871	6145	2.15
hn0377	36.27	12.02	0.9975	2920871	151869	8308	2.15
hn0378	34.34	11.62	0.9902	2933754	146796	8033	2.15
hn0379	39.86	13.48	0.9976	2937664	156271	1465	2.15
hn0380	32.99	11.16	0.9968	2916834	144780	9481	2.15
hn0382	36.8	12.44	0.9974	2926425	151260	8241	2.15
hn0383	45.07	15.21	0.9905	2912493	159379	8750	2.15
hn0384	38.61	13.07	0.9896	2934557	154272	9304	2.15
hn0385	41.57	13.92	0.9974	2935997	158463	9306	2.15
hn0386	32.05	10.84	0.9968	2906406	141348	7672	2.15
hn0387	44.02	14.89	0.9903	2932026	160338	8502	2.15
hn0388	38.14	12.89	0.99	2922233	152068	9399	2.15
hn0389	38.29	12.97	0.9901	2933447	151879	8092	2.15
hn0390	34.6	11.72	0.9901	2914850	146096	8452	2.15
hn0391	41.67	14.08	0.9904	2919383	155358	8599	2.15
hn0392	35.73	12.07	0.9971	2911736	147105	8685	2.15
hn0393	35.76	12.08	0.9972	2919327	149041	8493	2.15
hn0394	37.94	12.81	0.9974	2925205	153155	9179	2.15
hn0395	35.54	12.02	0.9902	2921378	148724	12629	2.15
hn0396	43.5	14.7	0.9903	2929792	158343	9121	2.15
hn0397	34.53	11.68	0.9899	2902458	145186	8354	2.15
hn0398	37.06	12.53	0.9973	2940922	152549	9117	2.15
hn0399	46.02	15.29	0.9904	2926050	159486	9795	2.15
hn0400	45.64	15.04	0.9905	2941351	160656	8591	2.15
hn0401	40.66	13.75	0.9902	2916594	153629	10062	2.15
hn0402	35.15	11.9	0.9901	2931318	150093	8634	2.15
hn0403	41.18	13.89	0.9901	2922823	157106	8357	2.15
hn0404	33	11.16	0.9898	2936654	145759	7897	2.15
hn0405	35.85	12.13	0.9902	2912091	149242	9038	2.15
hn0406	36.06	12.21	0.9974	2931290	151680	8979	2.15
hn0407	44.47	14.99	0.9977	2928858	160728	9449	2.15
hn0408	36.65	12.42	0.9903	2909993	150634	8681	2.15
hn0409	35.5	11.97	0.9971	2916964	149334	9010	2.15
hn0410	33.5	11.26	0.9897	2917483	145025	8091	2.15
hn0411	42.43	14.32	0.9976	2934561	159424	8380	2.15
hn0412	38.98	13.13	0.9977	2912916	154176	8823	2.15
hn0413	37.14	12.55	0.9899	2911931	149652	7499	2.15
hn0414	36.6	12.35	0.9973	2915815	150790	9133	2.15
hn0415	41.79	14.1	0.9905	2940759	160143	8660	2.15
hn0416	36.21	12.24	0.99	2926850	149720	9256	2.15
hn0417	34.93	11.78	0.9899	2914210	148335	12025	2.15
hn0418	37.71	12.73	0.9974	2941637	155155	9130	2.15
hn0419	34.08	11.52	0.997	2908818	147288	9071	2.15
hn0420	43.86	14.81	0.9975	2940046	161867	9326	2.15
hn0421	33.02	11.17	0.9901	2907020	143900	4517	2.15
hn0422	37.59	12.69	0.9975	2935752	155141	13071	2.15
hn0423	45.14	15.26	0.9905	2950071	164104	10672	2.15
hn0424	45.97	15.51	0.9906	2936965	163699	9879	2.15
hn0425	40.52	13.71	0.9904	2933032	156588	8931	2.15
hn0426	34.25	11.59	0.9901	2913289	147821	12310	2.15
hn0427	39.96	13.47	0.9976	2931179	157769	8356	2.15
hn0428	32.83	11.1	0.9966	2906657	145500	8079	2.15
hn0429	35.93	12.15	0.9973	2925160	150401	8690	2.15
hn0430	35.75	12.12	0.9901	2906826	149729	10344	2.15
hn0431	42.42	14.31	0.9977	2946538	160986	10161	2.15
hn0432	36.77	12.43	0.9898	2937592	153449	4495	2.15
hn0433	33.65	11.39	0.9898	2904017	144619	8833	2.15
hn0434	32.02	10.85	0.99	2917200	143081	7807	2.15
hn0435	42.11	14.21	0.9978	2941795	160197	9218	2.15
hn0436	37.7	12.73	0.9975	2923446	152651	8552	2.15
hn0437	35.85	12.14	0.9901	2845103	145971	8142	2.15
hn0438	36.07	12.21	0.9899	2917851	148668	8549	2.15
hn0439	41.47	14.01	0.9977	2928951	159267	9237	2.15
hn0440	35.04	11.84	0.9904	2912810	147743	9572	2.15
hn0441	32.73	11.05	0.9898	2909330	143566	7517	2.15
hn0442	36.35	12.28	0.9972	2924925	150813	8752	2.15
hn0443	33.91	11.47	0.9972	2920775	148120	8132	2.15
hn0444	43.68	14.75	0.9905	2936019	160431	1774	2.15
hn0445	33.97	11.46	0.99	2920056	146364	1316	2.15
hn0446	35.97	12.15	0.9973	2910145	152411	10365	2.15
hn0447	40.56	13.73	0.9904	2931258	159048	8819	2.15
hn0448	33.94	11.48	0.997	2917414	148566	8213	2.15
hn0449	35.83	12.14	0.9903	2918503	150608	9039	2.15
hn0450	36.15	12.25	0.9902	2922284	152453	8774	2.15
hn0451	42.35	14.33	0.9977	2935050	163092	8922	2.15
hn0452	38.44	13.04	0.9901	2915433	155706	8537	2.15
hn0453	38.27	12.93	0.9973	2928999	156417	8923	2.15
hn0454	32.38	10.98	0.9971	2921571	146408	6807	2.15
hn0455	43.33	14.66	0.9904	2920839	162948	10009	2.15
hn0456	39.57	13.37	0.9974	2939898	160753	8349	2.15
hn0457	35.57	12.04	0.9973	2917028	151374	8402	2.15
hn0458	35.6	12.05	0.9901	2920431	151965	11370	2.15
hn0459	40.81	13.8	0.9904	2927232	159011	9186	2.15
hn0460	34.81	11.69	0.997	2925315	149722	8660	2.15
hn0461	35.09	11.86	0.9901	2916031	149802	8426	2.15
hn0462	39.79	13.45	0.9969	2929445	160039	8552	2.15
hn0463	34.84	11.82	0.9901	2932309	149650	8153	2.15
hn0464	47.29	15.95	0.9978	2859703	164995	10368	2.15
hn0465	38.28	12.97	0.9975	2934330	157106	10445	2.15
hn0466	36.65	12.41	0.9974	2920276	154279	9836	2.15
hn0467	44.68	15.1	0.9978	2936724	166844	13376	2.15
hn0468	46.32	15.69	0.998	2956712	169300	9912	2.15
hn0469	41.62	14.06	0.9977	2936574	161166	10040	2.15
hn0470	32.22	10.9	0.9967	2901132	146861	8468	2.15
hn0471	37.49	12.68	0.9975	2963063	160368	8895	2.15
hn0472	31.57	10.68	0.9969	2925756	145805	7288	2.15
hn0473	33.09	11.2	0.9902	2931765	148806	12476	2.15
hn0474	32.76	11.1	0.997	2921083	149371	8473	2.15
hn0475	41.88	14.15	0.9977	2930888	164112	9542	2.15
hn0476	38.74	13.11	0.9976	2937045	158973	9023	2.15
hn0477	35.65	12.07	0.9973	2931277	155075	8622	2.15
hn0478	31.43	10.65	0.9969	2910352	144805	8053	2.15
hn0479	42.59	14.39	0.9975	2941942	166069	9130	2.15
hn0480	40.21	13.58	0.9973	2923492	160707	10183	2.15
hn0481	37.66	12.7	0.9976	2924494	156305	9017	2.15
hn0482	34.65	11.72	0.9972	2940776	153467	8822	2.15
hn0483	39.39	13.33	0.99	2934486	161303	9362	2.15
hn0484	34.3	11.61	0.9902	2943076	151614	12741	2.15
hn0485	34.39	11.62	0.9969	2918365	152415	9507	2.15
hn0486	38.74	13.08	0.9974	2933494	160460	10003	2.15
hn0487	35.54	12.01	0.9972	2918541	152889	8557	2.15
hn0488	46.14	15.58	0.9976	2943022	169858	9821	2.15
hn0489	33.34	11.25	0.9971	2927616	149785	8500	2.15
hn0490	36.22	12.23	0.9975	2920957	154720	8603	2.15
hn0491	44.6	15.08	0.9977	2932146	167739	9113	2.15
hn0492	45.37	15.34	0.9976	2932941	168277	9362	2.15
hn0493	41.58	14.04	0.9977	2940491	163402	9548	2.15
hn0494	35.58	12.03	0.9974	2920725	154723	8541	2.15
hn0495	41.77	14.08	0.9976	2934395	164526	10110	2.16
hn0496	33.69	11.4	0.9968	2926257	150302	9375	2.15
hn0497	35.73	12.09	0.9974	2925665	154837	9767	2.15
hn0498	35.31	11.95	0.9972	2915772	153311	9474	2.15
hn0499	38.61	13.04	0.9976	2926016	158747	7788	2.15
hn0500	38.21	12.93	0.9976	2933286	158844	9111	2.15
hn0501	33.58	11.37	0.9899	2916401	148990	8351	2.16
hn0502	32.38	10.96	0.9972	2920682	149176	8127	2.15
hn0503	44.18	14.79	0.9978	2941090	166730	9524	2.15
hn0505	35.78	12.15	0.9972	2932926	153544	10006	2.15
hn0506	36.16	12.23	0.9973	2938208	155346	8765	2.15
hn0507	40.03	13.49	0.9978	2934178	161031	9109	2.15
hn0508	35.14	11.86	0.9974	2925813	152371	8866	2.15
hn0510	36.81	12.48	0.9974	2930409	155461	8051	2.15
hn0511	36.26	12.24	0.9971	2933128	155487	5673	2.16
hn0512	44.47	15.02	0.9977	2932391	166790	9372	2.15
hn0515	42.38	14.38	0.9976	2936532	164940	13314	2.15
hn0517	39.8	13.51	0.9903	2952939	161338	8944	2.15
hn0519	43.76	14.75	0.9978	2950711	166913	10443	2.15
hn0520	31.75	10.76	0.99	2904989	144427	8428	2.15
hn0521	38.55	13.05	0.9902	2947013	157330	9266	2.15
hn0522	32.25	10.91	0.9969	2922109	149121	8692	2.15
hn0523	44.47	14.99	0.9977	2949133	167744	10055	2.15
hn0524	35.36	11.99	0.9902	2925242	153053	8589	2.15
hn0525	38.5	13	0.9975	2915883	156873	10149	2.15
hn0526	42.08	14.2	0.9975	2938520	165258	8755	2.15
hn0527	39.33	13.32	0.9904	2931167	159216	9071	2.15
hn0528	42.41	14.31	0.9975	2925200	165048	8930	2.15
hn0529	38.66	13.12	0.9976	2946167	162300	13927	2.15
hn0530	46.3	15.66	0.9906	2951383	170983	10875	2.15
hn0531	42.75	14.45	0.9901	2938238	165037	8677	2.15
hn0532	48.45	16.31	0.998	2952952	172209	9599	2.15
hn0533	44.21	14.9	0.9905	2915089	162336	9499	2.15
hn0534	46.37	15.64	0.9977	2930867	169562	10701	2.15
hn0535	42.04	14.21	0.9903	2925318	161622	9620	2.15
hn0536	38.68	13.07	0.9903	2940668	158909	8813	2.15
hn0537	35.05	11.83	0.9972	2922395	150912	8711	2.15
hn0538	43.51	14.65	0.9976	2934489	167170	9572	2.15
hn0539	40.45	13.66	0.9974	2932046	162498	9496	2.15
hn0540	36.05	12.08	0.9974	2928778	152875	5640	2.15
hn0541	41.08	13.79	0.9976	2934248	159760	9308	2.15
hn0542	32.66	10.97	0.997	2934271	147598	8113	2.15
hn0543	36.43	12.27	0.9902	2929250	153447	9268	2.15
hn0544	34.96	11.76	0.9902	2902661	149494	8343	2.15
hn0545	42.71	14.32	0.9902	2927658	160121	9530	2.15
hn0546	36.44	12.2	0.9903	2918777	152148	8184	2.15
hn0547	34.84	11.66	0.9972	2920752	151229	7349	2.15
hn0548	33.81	11.34	0.9971	2933972	149862	7694	2.15
hn0549	44	14.76	0.9978	2934572	162246	10016	2.15
hn0550	36.55	12.27	0.9901	2934541	152715	10145	2.15
hn0551	36.31	12.16	0.9902	2921545	150899	4077	2.15
hn0552	34.6	11.6	0.9972	2924748	150536	7603	2.15
hn0553	39.91	13.37	0.9904	2933279	157836	9000	2.15
hn0554	34.45	11.53	0.9902	2910387	147013	8002	2.16
hn0555	33.05	11.04	0.9972	2918369	146871	9048	2.15
hn0556	38.37	12.81	0.9975	2933900	157431	9220	2.15
hn0557	34.83	11.67	0.9973	2919143	150626	8541	2.15
hn0558	43.97	14.72	0.9903	2928376	162627	9485	2.15
hn0559	32.7	10.96	0.9902	2925089	145827	8761	2.15
hn0560	36.56	12.24	0.9974	2882629	151604	8996	2.15
hn0561	42.62	14.27	0.9903	2923929	159720	9281	2.15
hn0562	43.41	14.55	0.9907	2931067	161941	8961	2.15
hn0563	38.39	12.8	0.9975	2930034	154938	8795	2.15
hn0564	34.18	11.51	0.9899	2912234	149431	9662	2.15
hn0565	38.67	13.02	0.9976	2935009	158785	9263	2.15
hn0566	32.42	10.93	0.9901	2914605	144724	7921	2.16
hn0567	34.91	11.78	0.9903	2917534	151183	9740	2.15
hn0568	34.87	11.73	0.9972	2923274	152347	8779	2.15
hn0569	42.18	14.19	0.9905	2935186	161815	8813	2.15
hn0570	37.89	12.77	0.9903	2922354	156189	8910	2.15
hn0571	35.01	11.77	0.9973	2923504	152947	8625	2.15
hn0572	32.86	11.05	0.9902	2922417	147970	9452	2.15
hn0573	41.87	14.04	0.9903	2937200	161151	9251	2.15
hn0574	35.72	11.98	0.9971	2924585	152251	9410	2.15
hn0575	36.83	12.36	0.9901	2922408	153265	8914	2.15
hn0576	34.83	11.71	0.9902	2935310	151477	10994	2.15
hn0577	39.17	13.15	0.9901	2935639	157677	10713	2.15
hn0578	36.52	12.22	0.9973	2936251	153702	10453	2.16
hn0579	34.79	11.65	0.9972	2927600	151249	8045	2.15
hn0580	36.61	12.3	0.9901	2950267	156421	9039	2.15
hn0581	33.18	11.16	0.9973	2920705	149223	8174	2.15
hn0582	42.04	14.12	0.9906	2930556	161324	9037	2.15
hn0583	33.51	11.23	0.99	2922787	147248	8442	2.15
hn0584	37.55	12.63	0.9905	2925512	155170	8736	2.15
hn0585	40.09	13.48	0.9903	2919929	157912	9111	2.15
hn0586	42.34	14.18	0.9974	2936657	162320	8597	2.15
hn0587	38.42	12.88	0.9974	2927215	157397	8948	2.15
hn0588	38.15	12.87	0.9901	2924072	156943	9085	2.15
hn0589	40.51	13.65	0.9903	2939681	160850	9073	2.15
hn0590	31.02	10.46	0.9897	2917934	143572	11084	2.15
hn0591	35.52	11.98	0.9973	2867960	150841	6692	2.15
hn0592	33.47	11.27	0.997	2919290	148955	6983	2.15
hn0593	41.33	13.93	0.9904	2933035	160396	8241	2.15
hn0594	36.41	12.28	0.9902	2929580	155438	9769	2.15
hn0595	33.92	11.41	0.9973	2932351	151040	9321	2.15
hn0596	32.11	10.8	0.9972	2937957	148689	8223	2.15
hn0597	42.57	14.33	0.9905	2927127	162701	9409	2.15
hn0598	35.72	12.03	0.9899	2933787	153846	14091	2.15
hn0599	35.34	11.9	0.9976	2939600	152985	9068	2.15
hn0600	34.92	11.77	0.9901	2911509	149973	9094	2.15
hn0601	39.84	13.37	0.9972	2933661	160147	9402	2.15
hn0602	35.82	12.04	0.9903	2935344	152656	8846	2.15
hn0603	34.95	11.72	0.9973	2936883	153079	8390	2.15
hn0604	37.11	12.44	0.9975	2939304	157323	8947	2.15
hn0605	35.17	11.83	0.9975	2926936	153875	8909	2.15
hn0606	43.01	14.47	0.9903	2944245	162968	9087	2.15
hn0607	33.28	11.2	0.9971	2921366	148794	8664	2.15
hn0608	37.5	12.67	0.9903	2922953	155453	8794	2.16
hn0609	34.27	11.56	0.9972	2933021	152142	9022	2.15
hn0610	42.39	14.29	0.9904	2930048	161544	9145	2.15
hn0611	31.92	10.78	0.997	2924384	145686	7411	2.15
hn0612	45.21	15.27	0.9905	2929375	162488	9887	2.15
hn0613	57.03	19.22	0.9907	2948918	175254	8751	2.15
hn0614	34.4	11.58	0.9902	2911302	149311	10165	2.15
hn0615	36.77	12.35	0.9973	2934400	155419	9486	2.15
hn0616	43.22	14.51	0.9973	2941837	164929	8826	2.15
hn0617	43.77	14.72	0.9905	2941972	164958	9379	2.15
hn0618	40.49	13.61	0.9904	2937937	160660	7319	2.15
hn0619	35.74	12.05	0.99	2917362	152461	8743	2.15
hn0620	39.69	13.38	0.9905	2944216	159771	8122	2.15
hn0621	33.31	11.23	0.9972	2927478	149489	9560	2.15
hn0622	36.99	12.49	0.9975	2949462	157123	9313	2.15
hn0623	35.84	12.07	0.9971	2916681	154025	9272	2.15
hn0624	42.53	14.34	0.9902	2946234	164868	9010	2.15
hn0625	38.42	12.92	0.9973	2937793	159532	9441	2.15
hn0626	35.16	11.82	0.9973	2911981	151838	9242	2.15
hn0627	34.41	11.6	0.9973	2914048	151565	9034	2.15
hn0628	43.33	14.56	0.9976	2936086	163516	9372	2.15
hn0629	38.26	12.84	0.9977	2916071	156035	9531	2.15
hn0630	37.33	12.52	0.9974	2907065	153558	9653	2.15
hn0631	33.48	11.27	0.9969	2924640	148710	9463	2.15
hn0632	40.95	13.74	0.9976	2923589	160292	9231	2.15
hn0633	35.78	12	0.9976	2918551	151060	9302	2.15
hn0634	35.19	11.73	0.9973	2916760	151903	8273	2.15
hn0635	38.07	12.81	0.9975	2924011	157358	9958	2.15
hn0636	34.86	11.75	0.9903	2919124	152034	9413	2.15
hn0637	42.38	14.26	0.9978	2941329	164890	8694	2.15
hn0638	33.88	11.41	0.9899	2914827	148221	8226	2.15
hn0639	38.39	12.91	0.9903	2941834	157966	8369	2.15
hn0640	40.99	13.77	0.9977	2936008	161700	9631	2.15
hn0641	36.96	12.55	0.99	2929822	153771	9027	2.15
hn0642	41.52	14.09	0.9905	2934576	161623	9706	2.15
hn0643	37.25	12.64	0.9972	2931190	155937	9070	2.15
hn0645	39.07	13.26	0.9974	2933346	159450	9208	2.15
hn0646	38.19	12.97	0.9975	2931592	157651	8672	2.15
hn0647	46.14	15.63	0.9978	2895663	165804	9502	2.15
hn0648	36.26	12.31	0.9976	2941062	154298	8768	2.15
hn0649	36.22	12.3	0.9975	2938624	154788	10133	2.15
hn0650	43.38	14.73	0.9905	2932809	162104	11054	2.15
hn0651	46.32	15.69	0.998	2931592	166881	9549	2.15
hn0652	43.54	14.76	0.9978	2945439	165034	9208	2.15
hn0653	36.4	12.36	0.9973	2922910	154962	8897	2.15
hn0654	40.92	13.91	0.9976	2937553	162104	9226	2.15
hn0655	36.17	12.27	0.9973	2931168	154999	9176	2.15
hn0656	39.56	13.42	0.99	2932645	159271	9391	2.15
hn0657	39.01	13.26	0.9975	2945205	161429	12551	2.15
hn0658	43.33	14.72	0.9904	2943871	164428	9893	2.15
hn0659	39.5	13.4	0.9975	2953725	160086	7091	2.15
hn0660	30.02	10.18	0.9964	2898352	140579	6050	2.15
hn0661	33.51	11.4	0.9899	2917289	149008	8128	2.15
hn0662	45.18	15.32	0.9901	2947054	167175	9404	2.15
hn0663	39.92	13.56	0.9974	2947999	160733	9272	2.15
hn0664	37.97	12.9	0.9974	2940569	158251	9884	2.15
hn0665	39.33	13.36	0.9902	2931272	157399	9272	2.15
hn0666	40.98	13.87	0.9976	2945887	162241	10093	2.15
hn0667	40.6	13.78	0.9905	2929266	159652	9379	2.15
hn0668	39.39	13.36	0.9903	2932983	159182	8467	2.15
hn0669	39.87	13.53	0.9975	2936870	160895	12812	2.15
hn0670	36.43	12.37	0.9972	2913922	154448	8877	2.15
hn0671	53.29	18.09	0.9907	2938110	174163	10867	2.15
hn0672	34.8	11.83	0.9902	2937137	151524	8468	2.15
hn0673	42.49	14.42	0.9976	2944392	164974	10124	2.15
hn0674	49.82	16.91	0.9905	2941822	170407	9216	2.15
hn0675	36.33	12.33	0.9974	2926893	154513	9214	2.15
hn0676	39.14	13.28	0.9973	2930136	158284	8957	2.15
hn0677	34.72	11.8	0.9974	2931991	150502	8361	2.15
hn0678	37.74	12.82	0.9976	2922611	155347	9292	2.15
hn0679	38.05	12.93	0.9974	2930563	157522	9486	2.15
hn0680	45.41	15.39	0.9978	2943608	167459	9367	2.15
hn0681	41.05	13.96	0.9904	2912153	160101	9183	2.15
hn0682	38.16	12.94	0.9974	2934970	158029	8285	2.15
hn0683	31.44	10.69	0.9968	2911590	145454	7649	2.15
hn0684	41.68	14.15	0.9977	2935895	162317	11434	2.15
hn0685	38.38	13.03	0.9902	2932789	156288	9484	2.15
hn0686	39.75	13.47	0.9975	2925637	158698	4688	2.15
hn0687	35.84	12.17	0.9973	2921285	154076	9675	2.15
hn0688	38.77	13.17	0.9901	2939401	159057	9110	2.15
hn0689	39.81	13.49	0.9974	2936453	159487	10059	2.15
hn0690	41.55	14.12	0.9977	2932154	161455	10705	2.15
hn0691	38.45	13.08	0.9976	2918860	157493	8918	2.15
hn0692	36.55	12.43	0.9903	2938855	155451	8807	2.15
hn0693	44.19	14.99	0.9979	2941816	166354	10361	2.15
hn0694	35.33	11.99	0.9973	2920508	153792	8681	2.15
hn0695	38.24	12.98	0.9975	2933028	158456	10433	2.15
hn0696	43.26	14.7	0.9977	2941030	166919	14443	2.15
hn0697	50.54	17.15	0.9904	2924131	171672	8882	2.16
hn0698	42.6	14.45	0.9976	2920837	163409	9275	2.15
hn0699	36.73	12.49	0.9974	2928243	156213	9610	2.15
hn0700	40.06	13.61	0.9973	2935493	161107	9575	2.15
hn0701	35.23	11.99	0.99	2918992	152067	9422	2.15
hn0702	36.86	12.53	0.9903	2931729	155095	9221	2.15
hn0703	36.82	12.52	0.9973	2916374	154897	9448	2.15
hn0704	43.33	14.74	0.9903	2932723	164340	10572	2.15
hn0705	43.11	14.65	0.9906	2939527	164903	9641	2.15
hn0706	35.66	12.13	0.9902	2875912	151236	8482	2.15
hn0707	34.97	11.91	0.9901	2921013	151618	8290	2.15
hn0708	45.75	15.55	0.9903	2952789	168189	9156	2.15
hn0709	39.88	13.52	0.9975	2926940	159138	9007	2.15
hn0710	39.98	13.56	0.9976	2931433	160034	10497	2.15
hn0711	38.12	12.96	0.9902	2948848	157987	9148	2.15
hn0712	42.75	14.5	0.9906	2921322	162131	9344	2.15
hn0713	40.88	13.87	0.9975	2935779	161477	8971	2.15
hn0714	35.95	12.19	0.9975	2932125	153579	8872	2.15
hn0715	37.62	12.79	0.9976	2931402	156989	8708	2.15
hn0716	35.58	12.08	0.9973	2918881	153405	9688	2.15
hn0717	43.86	14.87	0.9976	2936134	164836	9220	2.15
hn0718	34.07	11.6	0.9901	2921989	149073	11399	2.15
hn0719	38.62	13.08	0.9903	2925049	156469	8739	2.15
hn0720	42.49	14.44	0.9903	2937747	162314	8671	2.15
hn0721	51.47	17.39	0.998	2947281	174951	9611	2.15
hn0722	41.57	14.1	0.9977	2950265	162458	9108	2.15
hn0723	35.77	12.11	0.9972	2933275	153490	8571	2.15
hn0724	39.62	13.47	0.9977	2921319	158949	10708	2.15
hn0725	33.54	11.42	0.9901	2916130	148295	9523	2.15
hn0726	36.37	12.35	0.9903	2938563	154249	10258	2.15
hn0727	38.06	12.93	0.9976	2933961	158572	9801	2.15
hn0728	40.66	13.79	0.9904	2928775	159390	8967	2.15
hn0729	41.02	13.95	0.9978	2937463	163847	16516	2.15
hn0730	35.56	12.09	0.9901	2934911	152773	8404	2.15
hn0731	34.09	11.59	0.9971	2875607	149125	8698	2.15
hn0732	40.09	13.6	0.9978	2942405	160471	9016	2.15
hn0733	39.44	13.4	0.9902	2928755	157048	9025	2.15
hn0734	37.13	12.61	0.9974	2934711	155501	9360	2.15
hn0735	38.61	13.11	0.9977	2939042	159070	9952	2.15
hn0736	42.91	14.55	0.9978	2930437	161960	10098	2.15
hn0737	44.24	15.01	0.998	2924584	163327	12335	2.15
hn0738	36.17	12.31	0.99	2932681	154238	9289	2.15
hn0739	40.69	13.81	0.9979	2957765	162684	9832	2.15
hn0740	36.3	12.32	0.9975	2926674	154696	9091	2.15
hn0741	44.64	15.17	0.9904	2947930	166139	9683	2.15
hn0742	34.87	11.86	0.9903	2927887	151880	9050	2.15
hn0743	40.38	13.72	0.9904	2928674	158704	9215	2.15
hn0744	43.25	14.66	0.9976	2932374	163530	8782	2.15
hn0745	50.59	17.18	0.9904	2947741	172441	9880	2.15
hn0746	40.51	13.76	0.9903	2929274	158408	9107	2.15
hn0747	38.32	13.02	0.9903	2922856	156812	9539	2.15
hn0748	40.36	13.71	0.9974	2939169	161038	9099	2.15
hn0749	33.9	11.52	0.9971	2928358	150032	8245	2.15
hn0750	36.5	12.41	0.9903	2936818	155884	14787	2.15
hn0751	37.65	12.79	0.9975	2945480	157666	9130	2.15
hn0752	43.57	14.78	0.9976	2939370	164796	9219	2.15
hn0753	42.61	14.46	0.9904	2927683	162522	9395	2.15
hn0754	35.5	12.06	0.9975	2926049	153221	9136	2.15
hn0755	35.42	12.02	0.9974	2922957	152842	8872	2.15
hn0756	43.04	14.58	0.9979	2921507	163298	8346	2.15
hn0757	38.38	13.03	0.9975	2937466	157656	8609	2.15
hn0758	38.03	12.9	0.9974	2927970	156300	8652	2.15
hn0759	37.73	12.83	0.9901	2928809	154918	9629	2.15
hn0760	39.95	13.53	0.9977	2924905	157944	8805	2.15
hn0761	40.69	13.82	0.9904	2944777	160023	9625	2.15
hn0762	36.5	12.41	0.9903	2935007	155592	14648	2.15
hn0763	42.08	14.29	0.9977	2937905	162550	9758	2.15
hn0764	34.27	11.62	0.9973	2913892	149989	8418	2.15
hn0765	43.16	14.64	0.9976	2939772	164688	9270	2.15
hn0766	29.98	10.19	0.9965	2907778	140492	7947	2.15
hn0767	44.55	15.12	0.9975	2911375	163943	9340	2.15
hn0768	38.84	13.2	0.9902	2927732	156157	9414	2.15
hn0769	44.4	14.85	0.9978	2929690	161565	10999	2.15
hn0770	35.26	11.95	0.9902	2925978	152869	8309	2.15
hn0771	43.86	14.83	0.9903	2934872	165135	9592	2.15
hn0772	35.27	11.95	0.9903	2925422	151578	8732	2.15
hn0773	37.95	12.86	0.9904	2922388	156770	9235	2.15
hn0774	36.1	12.23	0.9973	2934553	156492	4994	2.15
hn0775	42.2	14.29	0.9906	2930550	162759	10208	2.15
hn0776	38.54	13.07	0.9971	2922798	159237	10513	2.15
hn0777	36.62	12.41	0.9901	2925956	155708	8633	2.15
hn0778	34.1	11.53	0.9972	2934954	152747	8838	2.15
hn0779	43.19	14.62	0.9906	2934075	164844	14261	2.15
hn0780	38.59	13.07	0.9905	2951234	159247	8695	2.15
hn0781	38	12.88	0.9903	2924240	156534	8573	2.15
hn0782	37.63	12.73	0.9977	2939709	158370	9646	2.15
hn0783	41.41	14	0.9977	2942948	162913	10240	2.15
hn0784	35.81	12.13	0.9904	2946318	155135	10352	2.15
hn0785	35.7	12.05	0.9972	2922392	153711	9362	2.15
hn0786	43.29	14.63	0.9902	2935581	164174	8964	2.15
hn0787	35.34	11.98	0.9901	2931898	153133	8090	2.15
hn0788	44.94	15.21	0.9904	2947399	167701	10651	2.15
hn0789	35.41	11.98	0.9902	2926744	151821	9475	2.15
hn0790	37.99	12.85	0.9975	2941061	158506	5080	2.15
hn0791	43.38	14.67	0.9978	2945357	166341	9282	2.15
hn0792	43.62	14.76	0.9905	2938380	164912	9606	2.15
hn0793	40.46	13.69	0.9904	2947691	161750	10441	2.15
hn0794	40.81	13.82	0.9907	2926422	161350	9301	2.15
hn0795	42.07	14.24	0.9904	2935966	163820	9638	2.15
hn0796	35.9	12.16	0.9973	2931362	154690	8955	2.15
hn0797	37.91	12.85	0.9902	2931994	156953	9746	2.15
hn0798	38.51	13.05	0.9905	2931349	158127	8628	2.15
hn0799	42.02	14.23	0.9908	2931174	163205	8038	2.15
hn0800	38.29	12.97	0.9904	2931383	158309	9311	2.15
hn0801	37.33	12.66	0.9905	2933041	155909	10352	2.15
hn0802	42.41	14.35	0.9907	2940996	165604	9651	2.15
hn0803	45.69	15.43	0.9981	2939834	169219	9083	2.15
hn0804	40.39	13.63	0.9979	2934739	160773	5570	2.15
hn0805	38.32	12.99	0.99	2934119	157218	9529	2.15
hn0806	35.85	12.16	0.99	2866304	151907	7482	2.15
hn0807	42.18	14.27	0.9904	2929110	162627	9296	2.15
hn0808	35.37	11.99	0.9904	2924229	151849	9417	2.15
hn0809	39.62	13.46	0.99	2917350	158179	8804	2.15
hn0810	33.32	11.33	0.9903	2925874	147069	5923	2.15
hn0811	36.73	12.45	0.9903	2930979	154588	8542	2.15
hn0812	34.83	11.85	0.9905	2930407	151182	8548	2.15
hn0813	44.12	14.97	0.9906	2946011	164889	9176	2.15
hn0814	57.1	19.23	0.9981	2935787	176995	9856	2.15
hn0815	35.51	12.05	0.9975	2938845	153679	8159	2.15
hn0816	32.82	11.17	0.99	2918122	147893	9979	2.15
hn0817	43.37	14.7	0.9905	2935582	162640	9108	2.15
hn0818	38.83	13.18	0.9905	2934760	157078	9405	2.15
hn0819	39.8	13.51	0.9903	2929602	157116	8165	2.15
hn0820	34.88	11.85	0.9901	2921639	149796	8467	2.15
hn0821	40.85	13.85	0.9979	2947557	161824	9581	2.15
hn0822	36.04	12.24	0.9904	2927709	150616	9026	2.15
hn0823	36.69	12.46	0.9904	2936691	154418	8849	2.15
hn0824	37.86	12.85	0.9974	2934998	157031	9416	2.15
hn0825	34.75	11.82	0.9901	2915392	150523	4982	2.15
hn0826	43.09	14.62	0.9978	2934413	163671	9432	2.15
hn0827	33.46	11.36	0.9901	2921656	147068	7957	2.16
hn0828	38.66	13.12	0.9976	2933426	157311	9111	2.15
hn0829	42.33	14.34	0.9904	2931801	161137	11790	2.15
hn0830	45.06	15.29	0.9905	2944892	166501	9291	2.15
hn0831	38.55	13.09	0.9906	2937912	157377	8481	2.15
hn0832	35.27	12	0.9901	2925543	152780	8595	2.15
hn0833	39.57	13.46	0.9902	2935790	159504	9484	2.15
hn0834	36.25	12.3	0.9973	2935625	154720	9191	2.15
hn0835	38.44	13.04	0.9901	2918059	155539	8847	2.15
hn0836	37.5	12.76	0.9904	2938334	156583	8931	2.15
hn0837	43.99	14.89	0.9977	2943493	166441	9159	2.15
hn0838	38.8	13.18	0.9907	2933746	157816	8752	2.16
hn0839	36.81	12.48	0.9974	2929117	155663	9210	2.15
hn0840	33.01	11.23	0.99	2916031	148404	7591	2.15
hn0841	43.17	14.66	0.9904	2936455	165265	9659	2.15
hn0842	38.78	13.14	0.9976	2944297	159063	8764	2.15
hn0843	39.39	13.36	0.9904	2928919	158300	9451	2.15
hn0844	36.41	12.36	0.9975	2937993	155277	8788	2.15
hn0845	41.28	14.01	0.9907	2930224	161140	9754	2.15
hn0846	37.79	12.83	0.9904	2924791	153848	8946	2.15
hn0847	36.91	12.53	0.9901	2929890	154967	9381	2.15
hn0848	37.17	12.63	0.9901	2935714	156318	8833	2.15
hn0849	31.97	10.87	0.9968	2917971	147253	8011	2.15
hn0850	42.56	14.44	0.9977	2931181	163374	9343	2.15
hn0851	35.7	12.02	0.9901	2926562	152096	11026	2.15
hn0852	41.09	13.87	0.9976	2943200	161971	9408	2.15
hn0853	36.91	12.42	0.9901	2929812	151233	9382	2.15
hn0854	38.32	12.96	0.9975	2925771	154204	9538	2.15
hn0855	32.76	10.95	0.9969	2908925	145029	7221	2.15
hn0856	34.37	11.52	0.9899	2906791	145084	8537	2.15
hn0857	35.54	11.96	0.9971	2917464	150657	9708	2.16
hn0858	38.22	12.87	0.9904	2942971	156744	9037	2.15
hn0859	33.34	11.25	0.997	2925199	149845	8600	2.15
hn0860	33.44	11.3	0.9901	2925104	148323	8241	2.15
hn0861	31.76	10.73	0.9969	2917953	147040	9033	2.15
hn0862	36.64	12.36	0.9978	2922834	152063	7495	2.15
hn0863	30.88	10.37	0.9967	2910264	142844	7752	2.15
hn0865	33.94	11.4	0.9971	2913176	146508	8401	2.15
hn0866	29.93	9.99	0.9962	2902872	136461	7617	2.15
hn0868	37.77	12.81	0.997	2931652	157420	9900	2.15
hn0870	46.18	15.62	0.9979	2945301	169109	9805	2.15
hn0871	40.27	13.68	0.9904	2923878	159294	9890	2.15
hn0872	39.07	13.22	0.9903	2934827	159983	9116	2.15
hn0873	41.47	14.05	0.9979	2924220	162121	10304	2.15
hn0875	40.72	13.8	0.9976	2931504	162446	9551	2.15
hn0876	38.58	13.11	0.9904	2925156	158398	8852	2.15
hn0877	40.32	13.67	0.9904	2917050	158522	9467	2.15
hn0878	40.4	13.72	0.9977	2923422	161435	9054	2.15
hn0879	37.37	12.66	0.9974	2927668	156645	10008	2.15
hn0880	31.2	10.59	0.9969	2919180	145932	8229	2.15
hn0882	32.91	11.18	0.9901	2920241	148772	11070	2.15
hn0883	38.15	12.93	0.9976	2934142	158324	13488	2.15
hn0884	35.58	12.07	0.9901	2927002	151870	8564	2.15
hn0885	45.05	15.24	0.9978	2939098	168187	8602	2.15
hn0886	35.34	11.98	0.9975	2931614	152124	11372	2.15
hn0887	34.04	11.53	0.9971	2930407	151177	9374	2.15
hn0888	32.52	11.01	0.9971	2920813	147028	8283	2.15
hn0889	38.16	12.93	0.9975	2933852	157412	8986	2.15
hn0890	42.66	14.44	0.9977	2927673	163449	8890	2.15
hn0891	33.81	11.46	0.9972	2925374	149425	8667	2.15
hn0892	37.26	12.63	0.9976	2913794	154497	9636	2.15
hn0893	42.72	14.48	0.9978	2920150	162645	10057	2.15
hn0894	43.05	14.6	0.9978	2930647	164003	9452	2.15
hn0895	39.38	13.38	0.9976	2928447	158370	9122	2.15
hn0896	33.7	11.44	0.9973	2918638	150395	8471	2.15
hn0897	41.56	14.13	0.9907	2928993	161519	8620	2.16
hn0898	32.49	11.02	0.9969	2918445	146593	7998	2.15
hn0900	36.18	12.26	0.9975	2926008	154073	8672	2.15
hn0901	40.76	13.8	0.9976	2927286	160830	9034	2.15
hn0902	34.3	11.66	0.9969	2938785	152278	8692	2.15
hn0903	35.45	12.05	0.9973	2921862	152203	10251	2.15
hn0904	31.56	10.73	0.997	2910532	145709	8538	2.15
hn0905	39.19	13.29	0.9975	2944095	160006	12651	2.16
hn0906	38.04	12.89	0.9973	2940004	157469	11114	2.15
hn0907	37.58	12.76	0.9904	2918070	154483	9698	2.15
hn0908	35.78	12.15	0.9972	2935099	153251	9645	2.15
hn0909	41.73	14.13	0.9977	2929883	162141	9846	2.15
hn0910	38.57	13.08	0.9905	2941691	156051	9102	2.15
hn0911	32.5	11.03	0.9971	2914561	148477	9417	2.15
hn0912	40.01	13.57	0.9906	2929209	158898	9372	2.15
hn0913	36.64	12.44	0.9976	2918025	155217	8891	2.15
hn0914	47.08	15.94	0.998	2932527	168306	10041	2.15
hn0915	33.42	11.35	0.9902	2916624	147354	10189	2.15
hn0916	42.68	14.46	0.9978	2942780	163908	11175	2.15
hn0917	46.32	15.7	0.9906	2935926	166722	10027	2.15
hn0918	34.93	11.85	0.9898	2919970	151212	8627	2.15
hn0919	30.93	10.51	0.9898	2909363	142167	7958	2.15
hn0920	31.1	10.56	0.9968	2922088	144996	7625	2.15
hn0921	34.61	11.75	0.9971	2936533	151894	8905	2.15
hn0922	35.93	12.22	0.9902	2917124	152383	8911	2.15
hn0923	42.38	14.38	0.9976	2944878	164555	9479	2.15
hn0924	38.43	13.06	0.9976	2933920	158988	10078	2.15
hn0925	32.61	11.08	0.9968	2897635	147470	7600	2.15
hn0926	33.07	11.24	0.9971	2916106	148647	10999	2.16
hn0927	45.82	15.55	0.9905	2948030	168009	12340	2.15
hn0928	38.4	13.06	0.9902	2932097	157248	9177	2.15
hn0929	37.59	12.74	0.9976	2937822	156114	9244	2.15
hn0930	37.92	12.85	0.9903	2934633	156235	8702	2.15
hn0931	42.11	14.26	0.9976	2938607	162979	9279	2.15
hn0932	39.28	13.33	0.9904	2915190	157310	13418	2.15
hn0933	40.53	13.75	0.9975	2922097	161877	10222	2.15
hn0934	40.5	13.75	0.9976	2940344	162064	8988	2.15
hn0935	37.9	12.85	0.9975	2948752	160503	14340	2.15
hn0936	44.03	14.92	0.9976	2934324	164323	10730	2.15
hn0937	36.29	12.32	0.9904	2926326	153404	9416	2.15
hn0938	38.37	13.02	0.9974	2937975	157480	9032	2.15
hn0939	44.21	14.99	0.9908	2934978	164254	9234	2.15
hn0940	44.73	15.13	0.9978	2941715	166448	10208	2.15
hn0941	36.29	12.31	0.9971	2924586	153619	8986	2.15
hn0942	36.74	12.47	0.9973	2924424	156299	11040	2.15
hn0943	44.4	15.07	0.9976	2940985	165922	9801	2.15
hn0944	36.32	12.34	0.9972	2930097	155125	9263	2.15
hn0945	36.18	12.27	0.9975	2933708	154273	8629	2.15
hn0946	36.62	12.43	0.9975	2934767	154894	7947	2.15
hn0947	42.05	14.27	0.9977	2925046	162095	9115	2.15
hn0948	36.71	12.47	0.9907	2922020	152966	7855	2.15
hn0949	35.94	12.21	0.9904	2931719	153552	12207	2.15
hn0950	33.79	11.49	0.9903	2909115	148454	8030	2.15
hn0951	42.9	14.57	0.9906	2935139	162368	9611	2.15
hn0952	37.05	12.58	0.9904	2925758	154620	10238	2.15
hn0953	36.62	12.43	0.9974	2935755	155607	9631	2.15
hn0954	34.11	11.58	0.9901	2928984	149396	8766	2.15
hn0955	38.16	12.95	0.9903	2927582	156228	8407	2.15
hn0956	37.41	12.69	0.9904	2937159	155287	8334	2.15
hn0957	35.67	12.11	0.9903	2923584	152976	8826	2.15
hn0958	38.02	12.91	0.9901	2930154	157470	9415	2.15
hn0959	36.31	12.34	0.99	2919877	154582	12194	2.15
hn0960	41.41	14.04	0.9978	2927331	161534	8813	2.15
hn0961	32.01	10.88	0.9972	2924164	147255	8221	2.15
hn0962	32.03	10.88	0.997	2911010	145486	8612	2.15
hn0963	38.52	13.06	0.9977	2933687	157188	8761	2.15
hn0964	41.09	13.94	0.9904	2936843	160987	9711	2.15
hn0965	40.49	13.75	0.9975	2919105	160074	9619	2.15
hn0966	35.88	12.2	0.99	2932618	154854	8567	2.15
hn0967	39.13	13.26	0.9975	2924030	159864	13587	2.15
hn0968	32.82	11.15	0.9902	2937513	148133	7702	2.15
hn0969	40.61	13.77	0.9976	2927728	160542	10188	2.15
hn0970	40	13.59	0.9977	2948386	162066	9269	2.15
hn0971	44.46	15.08	0.9906	2935575	165387	9620	2.15
hn0972	41.16	13.98	0.9977	2926186	161398	13860	2.15
hn0973	39.2	13.32	0.9903	2937037	158964	8826	2.15
hn0974	36.31	12.32	0.9974	2920804	154389	8801	2.15
hn0975	48.39	16.38	0.9978	2944221	170779	9329	2.15
hn0976	43.86	14.88	0.9978	2934434	164776	9243	2.15
hn0977	40.43	13.73	0.9974	2941911	161243	8999	2.15
hn0978	36.95	12.53	0.9902	2873935	154349	9126	2.15
hn0979	49	16.56	0.9904	2932747	171837	11315	2.15
hn0980	38.2	12.94	0.9903	2933955	158217	9142	2.15
hn0981	37.74	12.77	0.9975	2934702	158131	9509	2.15
hn0982	44.32	14.99	0.9977	2934501	166748	9412	2.15
hn0983	46.7	15.78	0.9979	2940506	169475	9142	2.15
hn0984	41.16	13.93	0.9904	2952144	163944	9661	2.15
hn0985	36.89	12.49	0.9902	2930993	156100	8346	2.15
hn0986	39.44	13.32	0.9977	2938174	161558	9567	2.15
hn0987	34.51	11.69	0.9899	2924890	152270	9555	2.15
hn0988	38.87	13.14	0.9974	2934692	160369	10407	2.15
hn0989	35.52	12.02	0.9973	2908995	153989	9386	2.15
hn0990	41.69	14.09	0.9973	2949214	165493	10219	2.15
hn0991	37.61	12.75	0.9905	2940806	158803	13244	2.15
hn0993	33.33	11.27	0.9971	2941494	152226	8321	2.15
hn0994	42.03	14.2	0.9979	2927901	161859	5600	2.15
hn0995	40.43	13.65	0.9974	2919365	160429	9524	2.15
hn0996	37.15	12.59	0.99	2908886	154494	9204	2.15
hn0997	35.03	11.87	0.99	2922781	153092	8509	2.15
hn0998	40.24	13.59	0.9979	2944831	162380	9025	2.15
hn0999	36.46	12.32	0.997	2920749	154491	9374	2.16
hn1001	40.26	13.61	0.9977	2934125	162558	9131	2.15
hn1002	35.67	12.05	0.9972	2881249	151832	8880	2.15
hn1003	43.66	14.77	0.9905	2944780	164817	9356	2.15
hn1004	35.96	12.14	0.9974	2928872	154250	9146	2.15
hn1005	36.82	12.45	0.9973	2932633	155779	8798	2.15
hn1006	41.9	14.19	0.9906	2950595	164021	11335	2.15
hn1007	43.86	14.82	0.9904	2937883	165451	13176	2.15
hn1008	32.25	10.93	0.9898	2918462	146965	8278	2.15
hn1009	35.77	12.11	0.9971	2930987	155630	8572	2.15
hn1010	40.63	13.71	0.9975	2944012	162779	10091	2.15
hn1011	35.69	12.07	0.9901	2894089	153181	8610	2.15
hn1012	38.24	12.92	0.9974	2935824	159652	9768	2.15
hn1013	35.43	12.03	0.9903	2937369	155466	9558	2.15
hn1014	40.59	13.7	0.9978	2939189	163085	10339	2.15
hn1015	37.9	12.86	0.9904	2933812	159183	8232	2.15
hn1016	31.25	10.58	0.9899	2839824	141670	7116	2.16
hn1017	34.88	11.82	0.9899	2923868	153591	9078	2.15
hn1018	42.01	14.24	0.9903	2925413	162903	9368	2.15
hn1019	38.37	12.99	0.9904	2923382	157434	12347	2.15
hn1020	38.31	12.96	0.9976	2919508	158162	9278	2.15
hn1021	36.1	12.21	0.9901	2927100	153066	9195	2.15
hn1022	40	13.53	0.9976	2923350	160901	8509	2.15
hn1023	36.65	12.41	0.9904	2922702	155449	9127	2.15
hn1024	33.25	11.22	0.9973	2915736	149336	9783	2.15
hn1025	38.6	13.05	0.9977	2937349	159904	9702	2.15
hn1026	34.17	11.57	0.9973	2920431	151820	8511	2.15
hn1027	47.05	15.92	0.9981	2938162	169317	9901	2.15
hn1028	34.77	11.76	0.9974	2925521	152703	8818	2.15
hn1029	39.67	13.39	0.9977	2927926	160019	10846	2.15
hn1030	45.46	15.35	0.9977	2944345	169192	10970	2.15
hn1031	40.67	13.73	0.9903	2918284	159584	9419	2.15
hn1032	42.47	14.3	0.9978	2939790	164154	10372	2.15
hn1033	37.11	12.52	0.9975	2868714	151648	8797	2.15
hn1034	37.74	12.77	0.9903	2936079	155591	8419	2.15
hn1035	38.33	12.97	0.9972	2928769	158269	8686	2.15
hn1036	44.32	14.93	0.9977	2948613	166261	9249	2.15
hn1037	40.06	13.55	0.9976	2927947	160163	9183	2.15
hn1038	37.76	12.76	0.9974	2941874	158262	8989	2.15
hn1039	35.82	12.1	0.9973	2919849	154167	10004	2.15
hn1040	44.29	14.97	0.9904	2930420	164258	8890	2.15
hn1041	39.77	13.44	0.9903	2934317	157711	9649	2.15
hn1042	39.62	13.35	0.9974	2933893	158338	10322	2.15
hn1043	37.59	12.7	0.9901	2923919	153523	8455	2.15
hn1044	44.19	14.9	0.998	2917589	164065	9277	2.15
hn1045	38.75	13.09	0.9973	2940248	157264	9150	2.15
hn1046	40.05	13.51	0.9903	2940208	159680	10069	2.15
hn1047	40.8	13.77	0.9974	2927408	161166	9449	2.15
hn1048	35.88	12.13	0.9903	2934801	154098	8857	2.15
hn1049	44.96	15.15	0.9977	2938723	166185	9929	2.15
hn1050	35.01	11.83	0.9899	2936251	150572	8449	2.15
hn1051	35.81	12.11	0.9973	2931964	153085	9386	2.15
hn1052	43.43	14.67	0.9977	2939541	163542	9301	2.15
hn1053	41.76	14.09	0.9905	2934666	161659	9635	2.15
hn1054	38.01	12.82	0.9902	2921757	154164	8911	2.15
hn1055	36.79	12.44	0.9902	2925241	153656	8228	2.15
hn1056	39.78	13.44	0.9976	2943664	159884	9631	2.15
hn1057	33.76	11.41	0.9972	2921281	148966	8679	2.15
hn1058	36.32	12.3	0.9974	2922520	153577	9864	2.15
hn1059	36.83	12.46	0.9972	2938817	155134	8602	2.15
hn1060	43.09	14.53	0.9902	2935526	163707	9365	2.15
hn1061	38.78	13.12	0.9904	2940006	156919	8724	2.15
hn1062	33.42	11.31	0.9901	2920426	148106	8710	2.15
hn1063	37.69	12.74	0.9972	2934231	156721	8429	2.15
hn1064	35.03	11.84	0.9899	2927402	150498	7716	2.15
hn1065	35.87	12.15	0.9902	2934916	151611	8036	2.15
hn1066	35.21	11.9	0.9974	2926559	152614	8742	2.15
hn1067	41.55	14.02	0.9904	2936364	160995	9335	2.15
hn1068	38.8	13.11	0.9977	2937548	158413	8361	2.15
hn1069	33.79	11.43	0.9972	2935506	150054	8130	2.15
hn1070	34.48	11.68	0.9901	2923300	150522	8410	2.15
hn1071	38.8	13.11	0.9904	2929724	156613	9427	2.15
hn1072	37	12.5	0.9902	2926596	153845	8874	2.15
hn1073	35.7	12.07	0.9974	2926538	151724	8877	2.15
hn1074	36.98	12.51	0.9901	2931163	154329	8809	2.15
hn1075	40.7	13.74	0.9975	2928008	160095	9985	2.16
hn1076	34.94	11.79	0.9973	2917767	149688	8060	2.15
hn1077	36.43	12.26	0.9971	2944377	154929	9088	2.15
hn1078	41.22	13.9	0.9974	2921290	160617	10106	2.15
hn1079	36.99	12.48	0.9973	2943158	155789	8669	2.15
hn1080	43.46	14.69	0.9905	2939587	164212	10410	2.15
hn1081	34.3	11.6	0.9972	2903237	149139	8505	2.15
hn1082	37.57	12.69	0.9972	2923476	156655	10347	2.15
hn1083	42.25	14.25	0.9977	2918018	161251	9808	2.15
hn1084	43.04	14.55	0.9902	2926437	162221	9566	2.15
hn1085	37.31	12.6	0.9973	2928719	154067	9266	2.15
hn1086	36.78	12.44	0.9973	2930032	155407	8984	2.15
hn1087	42.09	14.24	0.9905	2948111	162874	8990	2.15
hn1088	33.67	11.37	0.9971	2923904	148335	9476	2.15
hn1089	35.07	11.87	0.9969	2913576	151638	9440	2.15
hn1090	35.63	12.06	0.9973	2921985	152657	8422	2.15
hn1091	41	13.85	0.9978	2936424	160911	8938	2.15
hn1092	37.16	12.59	0.9903	2938375	156514	8454	2.15
hn1093	34.89	11.82	0.9902	2922585	151431	8848	2.15
hn1094	33.3	11.28	0.9902	2935403	150478	8891	2.15
hn1095	41.25	13.94	0.9904	2941797	161473	9288	2.15
hn1096	36.68	12.4	0.9975	2930662	154366	8543	2.15
hn1097	38.38	12.98	0.9902	2920527	155907	9733	2.16
hn1098	35.45	11.97	0.9974	2924335	150238	8879	2.15
hn1099	35.17	11.88	0.9973	2932378	152295	9174	2.15
hn1100	35.83	12.08	0.9975	2928700	151576	8897	2.15
hn1101	35.16	11.86	0.9974	2912967	151431	7649	2.15
hn1102	36.4	12.26	0.9974	2925988	154457	8418	2.15
hn1103	35.35	11.94	0.9901	2915619	151146	8193	2.15
hn1104	41.96	14.15	0.9976	2915172	161181	9275	2.15
hn1105	35.74	12.07	0.9976	2931972	152744	9374	2.15
hn1106	37.09	12.51	0.9974	2926943	154791	9208	2.15
hn1107	43.54	14.71	0.9905	2938279	164522	10138	2.15
hn1108	43.37	14.64	0.9904	2948108	164204	13626	2.15
hn1109	38.82	13.1	0.9978	2927653	156367	8942	2.15
hn1110	37.33	12.63	0.99	2928118	155103	10113	2.15
hn1111	40.63	13.73	0.9903	2916371	160110	10392	2.15
hn1112	33.53	11.33	0.99	2924367	147663	8188	2.15
hn1113	36.58	12.38	0.99	2912961	152980	8702	2.15
hn1114	36.34	12.29	0.9901	2924308	153282	9450	2.15
hn1115	40.25	13.57	0.9901	2921034	158535	8991	2.15
hn1116	36.91	12.48	0.9969	2918150	154510	9236	2.15
hn1117	34.16	11.54	0.9972	2930857	150685	8486	2.15
hn1118	35.94	12.13	0.9968	2929630	155438	9116	2.15
hn1119	39.27	13.28	0.9973	2934669	158892	10188	2.15
hn1120	37.13	12.54	0.9901	2926019	155859	13943	2.15
hn1121	36.23	12.25	0.9904	2918370	150752	8556	2.15
hn1122	36.53	12.33	0.9976	2934391	154767	8505	2.15
hn1123	40.34	13.63	0.9968	2946632	161184	9207	2.15
hn1124	36.94	12.47	0.9904	2930254	152344	9408	2.15
hn1125	33.99	11.44	0.9899	2925734	148409	8966	2.15
hn1126	38.37	12.93	0.9975	2935149	157532	9643	2.15
hn1127	38.47	12.98	0.9904	2931931	156668	9112	2.15
hn1128	43.17	14.58	0.9905	2919902	163061	8762	2.15
hn1129	34.6	11.68	0.9901	2933090	150758	8668	2.15
hn1130	37.65	12.7	0.9902	2937804	156281	7721	2.15
hn1131	41.05	13.88	0.9905	2947484	160724	8391	2.15
hn1132	41.96	14.13	0.9976	2932257	161854	9396	2.15
hn1133	36.41	12.3	0.9901	2934868	153642	8649	2.15
hn1134	34.02	11.5	0.9971	2921517	149688	9054	2.15
hn1135	41.2	13.9	0.9976	2943633	162265	8369	2.16
hn1136	33.78	11.39	0.9971	2922771	148633	7997	2.15
hn1137	35.85	12.13	0.9902	2925345	152644	8799	2.15
hn1138	36.7	12.41	0.9972	2931016	155062	9132	2.15
hn1139	41.75	14.1	0.9902	2917532	160430	8370	2.15
hn1140	36.78	12.43	0.9901	2919604	153329	9288	2.15
hn1141	31.63	10.68	0.9898	2919897	143252	8035	2.15
hn1142	34.16	11.55	0.9972	2928800	152575	8724	2.15
hn1143	43.15	14.57	0.9977	2935665	163474	8948	2.15
hn1144	40.28	13.58	0.9903	2941510	160023	9200	2.15
hn1145	36.73	12.38	0.9973	2917887	152711	9718	2.15
hn1146	34.44	11.62	0.9973	2927562	150502	8654	2.15
hn1147	39.48	13.32	0.9906	2930596	156781	9227	2.15
hn1148	34.85	11.75	0.9972	2915852	149422	9485	2.15
hn1149	33.21	11.17	0.9898	2923556	146179	8643	2.15
hn1150	38.46	12.99	0.9904	2930410	156423	9114	2.15
hn1151	34.02	11.49	0.9974	2927902	150814	8290	2.15
hn1152	42.48	14.3	0.9976	2936278	163061	8978	2.15
hn1153	37.65	12.69	0.9972	2924029	155102	8847	2.15
hn1154	36.98	12.47	0.9972	2922723	153177	8656	2.15
hn1155	40.37	13.63	0.9903	2944167	159628	9399	2.15
hn1156	36.55	12.26	0.9899	2936593	152880	8605	2.15
hn1157	34.29	11.6	0.9971	2916965	149810	9028	2.16
hn1158	41.01	13.88	0.9902	2931707	160966	9147	2.15
hn1159	32.41	11	0.99	2912596	145898	7994	2.15
hn1160	38.08	12.9	0.9903	2928752	154793	8728	2.15
hn1161	43.38	14.69	0.998	2939112	164544	13006	2.15
hn1162	36.84	12.52	0.9902	2925148	155586	8603	2.15
hn1163	36.68	12.45	0.9974	2940952	155515	8764	2.16
hn1164	38.24	12.61	0.9902	2937613	156122	9945	2.15
hn1165	37.57	12.37	0.9976	2933304	156071	8489	2.15
hn1166	31.89	10.54	0.9969	2907503	144676	7994	2.15
hn1167	38.25	12.6	0.9975	2928676	156602	8228	2.15
hn1168	33.83	11.16	0.9971	2925995	150048	9062	2.15
hn1169	37.41	12.23	0.9904	2910224	153535	8745	2.15
hn1170	37.54	12.29	0.9902	2925830	154845	9470	2.15
hn1171	34.47	11.36	0.9974	2922970	151592	8113	2.15
hn1172	43.59	14.33	0.9976	2924048	162136	8505	2.15
hn1173	36.23	11.96	0.9905	2925739	152259	8198	2.15
hn1174	37.03	12.22	0.9902	2916515	153572	9636	2.15
hn1175	37.68	12.43	0.9975	2928001	154378	8292	2.15
hn1176	41.89	13.83	0.9905	2943540	161463	10084	2.15
hn1177	37.37	12.27	0.9973	2909495	153862	8906	2.15
hn1178	38.96	12.91	0.9903	2928423	157040	8988	2.15
hn1179	39.15	12.94	0.9904	2930289	157084	9496	2.15
hn1180	32	10.57	0.9966	2907773	145540	8684	2.15
hn1181	35.67	11.83	0.9903	2928838	151747	9503	2.15
hn1182	34.68	11.5	0.9903	2927679	150880	7806	2.15
hn1183	39.5	13.07	0.9975	2933989	158961	8621	2.16
hn1184	37.85	12.58	0.9904	2925054	155023	8934	2.15
hn1185	36.64	12.11	0.9971	2930534	155281	8927	2.15
hn1186	34.18	11.23	0.9971	2931051	150023	9061	2.15
hn1187	41.54	13.76	0.9976	2937239	161957	10408	2.15
hn1188	37.65	12.42	0.9903	2919070	153912	8536	2.15
hn1189	36.09	11.9	0.9974	2926506	153004	8106	2.15
hn1190	34.42	11.41	0.9973	2926662	150805	8609	2.15
hn1191	39.26	12.97	0.9903	2926212	157027	8722	2.15
hn1192	36.01	11.89	0.9974	2912615	150931	8659	2.15
hn1193	35.77	11.74	0.9971	2917982	152266	8936	2.15
hn1194	41.56	13.64	0.9903	2941022	161182	9357	2.15
hn1195	37.02	12.2	0.9974	2889023	153323	8692	2.15
hn1196	42.27	13.93	0.9905	2932353	161598	8985	2.15
hn1197	33.73	11.08	0.99	2925035	148213	8885	2.15
hn1198	37.47	12.35	0.9903	2929367	153223	8533	2.15
hn1199	41.17	13.57	0.9908	2935633	159057	8987	2.15
hn1200	48.55	15.98	0.998	2938933	168894	9850	2.15
hn1201	41.3	13.49	0.9977	2928542	158544	9958	2.16
hn1202	42.27	13.88	0.9978	2925195	159751	9264	2.15
hn1203	30.56	10.11	0.9899	2905373	140834	7419	2.15
hn1205	31.43	10.41	0.9968	2905284	143490	7780	2.15
hn1206	34.34	11.36	0.997	2934178	151131	8385	2.15
hn1207	32.48	10.74	0.9967	2915106	145164	7986	2.15
hn1208	32.83	10.8	0.9969	2916452	147044	8847	2.15
hn1209	33.96	11.23	0.9971	2923030	149276	8484	2.15
hn1210	33.49	11.04	0.997	2920891	148310	8212	2.15
hn1211	41.55	13.77	0.9908	2926610	156971	9570	2.15
hn1212	37.87	12.55	0.9975	2934166	154774	8912	2.15
hn1213	45.11	14.9	0.9977	2922774	161915	9393	2.15
hn1214	41	13.54	0.9976	2869867	153883	8262	2.15
hn1215	38.79	12.83	0.9976	2918172	156205	9134	2.15
hn1216	35.35	11.56	0.9973	2918665	147534	8347	2.16
hn1217	34.19	11.31	0.9972	2908968	146712	8905	2.15
hn1218	41.39	13.78	0.9977	2929088	160784	10223	2.15
hn1219	37.37	12.65	0.99	2926492	156980	10155	2.15
hn1220	40.98	13.84	0.9975	2947137	162121	8776	2.15
hn1221	33.64	11.39	0.9967	2915565	149800	8102	2.15
hn1222	34.56	11.71	0.9901	2924040	150485	8674	2.15
hn1223	34.77	11.77	0.9973	2918876	152965	10061	2.15
hn1224	42.16	14.26	0.9903	2935241	161833	8807	2.15
hn1225	37.77	12.82	0.9903	2925468	156617	8994	2.15
hn1226	35.61	12.06	0.9973	2927281	154646	9043	2.15
hn1227	36.94	12.52	0.9901	2934219	156128	7830	2.15
hn1228	42.24	14.29	0.9976	2946673	163074	8269	2.15
hn1229	38.9	13.17	0.9902	2932242	158495	9159	2.15
hn1230	36.37	12.32	0.9901	2923571	154833	8407	2.15
hn1231	43.08	14.55	0.9976	2926386	164391	9476	2.15
hn1232	38.57	13.03	0.9973	2945269	158864	9872	2.15
hn1233	38.06	12.9	0.9975	2871692	154963	10800	2.16
hn1234	36.34	12.31	0.9902	2923058	153106	7454	2.15
hn1235	35.3	11.94	0.9972	2920368	152570	7984	2.15
hn1236	41.85	14.15	0.9977	2932787	161444	8384	2.15
hn1237	33.36	11.3	0.9901	2912690	145948	8840	2.15
hn1238	36.01	12.2	0.99	2928003	153274	8831	2.15
hn1239	35.29	11.91	0.9971	2925268	152324	8849	2.15
hn1240	41.03	13.87	0.9976	2944221	161756	8829	2.15
hn1241	37.14	12.57	0.99	2932553	154659	8723	2.15
hn1242	36.54	12.37	0.9903	2923164	152835	8863	2.15
hn1243	33.75	11.43	0.9973	2923807	150077	8922	2.15
hn1244	44.22	14.92	0.9978	2942346	164925	8995	2.15
hn1245	37	12.51	0.99	2925553	153411	8350	2.15
hn1246	38.02	12.84	0.9973	2841504	152321	7544	2.15
hn1247	35.94	12.14	0.9974	2944044	153903	8887	2.15
hn1248	44.25	15	0.9978	2943452	166738	10172	2.15
hn1249	34.32	11.64	0.9973	2928654	151293	8342	2.15
hn1250	36.47	12.38	0.9903	2931720	154788	8005	2.15
hn1251	43.52	14.78	0.9979	2931616	165348	10265	2.15
hn1252	40.28	13.68	0.9976	2938283	161734	7769	2.15
hn1253	39.48	13.42	0.9901	2932405	160453	9539	2.15
hn1254	36.79	12.51	0.9902	2921550	155493	9766	2.15
hn1255	41.73	14.17	0.9977	2947282	164916	8889	2.15
hn1256	34.87	11.86	0.9904	2937992	152940	8024	2.15
hn1257	37.03	12.58	0.9974	2929405	156646	9037	2.15
hn1258	34.78	11.82	0.9973	2934922	152966	8459	2.15
hn1259	41.41	14.06	0.9977	2932924	162717	9554	2.15
hn1260	36.73	12.5	0.9973	2925720	156298	9678	2.15
hn1261	36.99	12.58	0.9902	2916061	154854	8628	2.15
hn1262	35.41	12.04	0.9974	2937297	155184	8335	2.15
hn1263	44.71	15.17	0.9977	2946210	167653	10349	2.15
hn1264	39.65	13.47	0.9977	2944027	161727	9623	2.15
hn1265	38.64	13.11	0.9977	2939521	159733	9418	2.15
hn1266	35.72	12.14	0.9904	2925361	153017	9087	2.15
hn1267	40.32	13.69	0.9977	2931169	162822	8983	2.15
hn1268	36.23	12.31	0.9903	2935397	153590	8939	2.15
hn1269	34.17	11.62	0.9899	2936317	151667	8318	2.15
hn1270	38.18	12.96	0.9977	2928413	159020	8799	2.15
hn1271	36.65	12.44	0.9975	2934173	157134	9487	2.15
hn1272	46.96	15.94	0.9906	2941881	168813	9259	2.15
hn1273	35.7	12.12	0.9972	2921098	154542	8984	2.15
hn1274	38	12.88	0.9901	2931086	156607	9056	2.15
hn1275	43.24	14.66	0.998	2939622	165481	8995	2.15
hn1276	44.86	15.21	0.9905	2942635	166592	10657	2.15
hn1277	40.03	13.59	0.9904	2934198	160625	9313	2.15
hn1278	36.12	12.26	0.9973	2923369	155208	9017	2.15
hn1279	41.96	14.26	0.9906	2941919	163863	9621	2.15
hn1280	36.11	12.27	0.9975	2934585	155457	8672	2.15
hn1281	37.74	12.83	0.9901	2934207	156848	9459	2.15
hn1282	37.55	12.75	0.9971	2941271	158563	9440	2.15
hn1283	43.34	14.73	0.9978	2931634	164963	9125	2.15
hn1284	39.22	13.34	0.9976	2945139	162437	9726	2.15
hn1285	38.06	12.95	0.9906	2935794	157737	8668	2.15
hn1286	35.5	12.07	0.9971	2923905	154767	8458	2.15
hn1287	32.93	11.2	0.9972	2922830	147927	8886	2.15
hn1288	30.35	10.31	0.9899	2894428	139840	7712	2.16
hn1289	36.39	12.36	0.9975	2939095	156318	8513	2.15
hn1290	37	12.57	0.9903	2909068	154303	9001	2.15
hn1291	43.81	14.88	0.9906	2936739	164511	9040	2.15
hn1292	38.57	13.08	0.9977	2934074	158127	10258	2.15
hn1293	40.59	13.79	0.9905	2934366	161785	9403	2.15
hn1294	42.86	14.57	0.9976	2934394	164815	9191	2.15
hn1295	36.08	12.26	0.9974	2922053	155082	9004	2.15
hn1296	46.4	15.74	0.991	2939088	167738	10388	2.15
hn1297	37.79	12.84	0.9975	2937180	157809	9849	2.15
hn1298	40.05	13.6	0.9976	2951813	163154	11285	2.15
hn1299	40.91	13.89	0.9977	2928840	160701	9499	2.15
hn1300	45.21	15.34	0.9978	2936003	166877	10323	2.15
hn1301	44.67	15.17	0.9905	2923263	164540	10304	2.15
hn1302	36.4	12.38	0.9903	2943645	156359	8792	2.15
hn1303	41.36	14.05	0.9903	2930163	162108	9133	2.15
hn1304	35.35	12.02	0.9901	2918420	152211	10423	2.15
hn1305	40.88	13.87	0.9976	2939662	162439	9583	2.15
hn1306	39.41	13.38	0.9974	2925146	159529	9854	2.15
hn1307	46.77	15.84	0.9978	2927307	167592	9526	2.15
hn1308	41.06	13.96	0.9905	2936738	161998	8890	2.15
hn1309	39.56	13.44	0.9976	2940880	161669	9420	2.15
hn1310	36.99	12.57	0.9976	2945432	158730	9410	2.15
hn1311	44.66	15.16	0.9901	2931623	165962	9542	2.15
hn1312	41.32	14.01	0.9978	2931561	162072	9692	2.15
hn1313	39.88	13.54	0.9976	2937294	161013	8750	2.15
hn1314	37.05	12.58	0.9902	2932876	154657	9139	2.15
hn1315	44.36	15.04	0.9978	2945454	166603	9348	2.15
hn1316	40.93	13.86	0.9976	2930463	161769	9179	2.15
hn1317	39.4	13.36	0.9904	2929698	158595	8711	2.15
hn1318	40.65	13.82	0.9976	2946639	163515	9136	2.15
hn1319	37.74	12.84	0.9976	2918909	158199	9256	2.15
hn1320	47.39	16.09	0.9979	2936378	169242	9094	2.15
hn1321	37.99	12.9	0.9976	2933638	158776	10004	2.15
hn1322	32.19	10.95	0.9971	2920330	147330	8429	2.15
hn1323	34.96	11.89	0.9974	2920978	153077	10820	2.15
hn1324	38.64	13.12	0.9975	2925482	158614	8732	2.15
hn1325	40.73	13.83	0.9974	2942534	163043	14772	2.15
hn1326	35.51	11.98	0.9974	2927073	152371	9397	2.15
hn1327	36.98	12.56	0.9973	2931087	156338	9555	2.15
hn1328	36.93	12.53	0.9974	2904089	154373	8263	2.15
hn1329	40.35	13.71	0.9905	2945995	160172	9398	2.15
hn1330	36.1	12.26	0.9975	2925133	154128	9050	2.15
hn1331	35.75	12.14	0.99	2932486	152639	8695	2.15
hn1332	36.43	12.39	0.9902	2939533	156262	8587	2.15
hn1333	48.79	16.5	0.9981	2958953	172015	9585	2.15
hn1334	41.99	14.24	0.9979	2932397	161033	9061	2.15
hn1335	39.69	13.47	0.9901	2929591	158333	9288	2.15
hn1336	37.11	12.6	0.9904	2941099	155742	8383	2.15
hn1337	40.67	13.8	0.9976	2940113	160717	8594	2.15
hn1338	37.06	12.57	0.9973	2935889	154518	8916	2.15
hn1339	36.37	12.34	0.9901	2941381	153541	8251	2.15
hn1340	41.57	14.1	0.9979	2941733	162632	9400	2.15
hn1341	40.52	13.72	0.9977	2936675	160755	8639	2.15
hn1342	45.68	15.48	0.9976	2944726	167602	9447	2.15
hn1343	36.48	12.35	0.9973	2921218	153501	8729	2.15
hn1344	37.79	12.83	0.99	2932852	155807	9644	2.15
hn1345	42.75	14.5	0.9976	2925521	163184	9043	2.15
hn1346	46.42	15.73	0.998	2940022	167981	9041	2.15
hn1347	43.77	14.83	0.9976	2920710	163745	9695	2.15
hn1348	37.76	12.82	0.9904	2924367	155586	9244	2.15
hn1349	41.13	13.96	0.9977	2920351	161639	9937	2.15
hn1350	35.36	12	0.9975	2939991	154112	8557	2.15
hn1351	37.37	12.67	0.9975	2930625	155322	8366	2.15
hn1352	37.64	12.77	0.9974	2933088	156203	9278	2.15
hn1353	42.77	14.5	0.9905	2924137	162244	8960	2.15
hn1354	38.89	13.2	0.9905	2939416	158591	8848	2.16
hn1355	35.76	12.15	0.9905	2920764	151578	9790	2.15
hn1356	36.31	12.31	0.9975	2920376	154212	9184	2.15
hn1357	44.32	15.05	0.9905	2931850	164826	9911	2.15
hn1358	41.26	13.98	0.9976	2931211	161161	8644	2.15
hn1359	40.03	13.6	0.9904	2930733	158430	9795	2.15
hn1360	37.31	12.67	0.9897	2932608	155020	9957	2.15
hn1361	40.66	13.81	0.9903	2926536	159407	9163	2.15
hn1362	37.15	12.59	0.9976	2887805	152222	9836	2.15
hn1363	36.93	12.52	0.9973	2935673	156176	9163	2.15
hn1364	43.85	14.9	0.9904	2950695	166764	9803	2.15
hn1365	39.91	13.56	0.9904	2924231	159005	8114	2.15
hn1366	47.16	15.99	0.9979	2928608	168074	9810	2.15
hn1367	38.33	12.99	0.9977	2931840	157765	8664	2.15
hn1368	40.74	13.84	0.9901	2922008	159427	8585	2.16
hn1369	45.19	15.3	0.9977	2941598	166370	9141	2.15
hn1370	45.76	15.52	0.9908	2949208	167273	9387	2.15
hn1371	38.71	13.12	0.9974	2921878	156578	8474	2.15
hn1372	36.17	12.26	0.9973	2928316	153568	8180	2.15
hn1373	39.13	13.26	0.9977	2947851	160413	12648	2.15
hn1374	37.54	12.71	0.9977	2928925	155636	8463	2.15
hn1375	39.04	13.23	0.9977	2927091	157556	9098	2.15
hn1376	36.95	12.54	0.9972	2929037	156483	9170	2.15
hn1377	41.03	13.91	0.9977	2936902	160884	9052	2.15
hn1378	38	12.89	0.9975	2914031	156243	9368	2.15
hn1379	36.61	12.42	0.9903	2922653	153964	9305	2.15
hn1380	35.43	12.01	0.9974	2927486	153752	9639	2.15
hn1381	44.35	15.04	0.9973	2928534	164640	8960	2.15
hn1382	43.85	14.88	0.9904	2920893	161930	9695	2.15
hn1383	41.95	14.22	0.9976	2932168	161784	9148	2.15
hn1384	37.42	12.7	0.9902	2920621	154121	9668	2.15
hn1385	39.16	13.26	0.9976	2939320	159562	9398	2.15
hn1386	36.56	12.38	0.9975	2947301	154337	8474	2.15
hn1387	36.39	12.35	0.9905	2916807	152527	9831	2.15
hn1388	41.12	13.9	0.9976	2923555	160927	9171	2.15
hn1389	37.84	12.82	0.9975	2930331	157594	8722	2.15
hn1390	48.3	16.38	0.9907	2934816	167972	9513	2.15
hn1391	37.63	12.77	0.9901	2925046	154874	9259	2.15
hn1392	40.83	13.83	0.9978	2944333	161847	9336	2.15
hn1393	44.86	15.18	0.998	2931771	165560	9750	2.15
hn1394	42.71	14.5	0.9906	2936953	163125	10806	2.15
hn1395	38.5	13.06	0.9975	2931034	157539	9205	2.15
hn1396	38.6	13.1	0.9973	2926084	158582	8426	2.15
hn1397	44.01	14.93	0.9977	2937345	165749	9319	2.15
hn1398	37.65	12.8	0.9976	2943814	157138	9619	2.15
hn1399	42.27	14.36	0.9902	2934860	162509	9471	2.15
hn1400	38.14	12.99	0.9904	2937674	157343	9472	2.15
hn1401	45.62	15.46	0.9978	2927705	165849	9188	2.15
hn1402	40.82	13.86	0.9975	2932840	162246	10307	2.15
hn1403	38.74	13.15	0.9904	2939843	158363	9280	2.15
hn1404	36.86	12.51	0.9905	2933173	154831	8902	2.15
hn1405	45.95	15.57	0.9973	2944340	167738	9209	2.15
hn1406	41.17	13.98	0.9977	2930364	160440	9032	2.15
hn1407	40.53	13.77	0.9905	2943312	160040	9326	2.15
hn1408	38.93	13.22	0.9974	2934909	158836	9122	2.15
hn1409	45.54	15.45	0.998	2936430	166683	9232	2.15
hn1410	39.98	13.57	0.9976	2930419	158438	9266	2.15
hn1411	40.33	13.67	0.9978	2936423	161554	8714	2.15
hn1412	42.16	14.33	0.9906	2929292	162159	11439	2.15
hn1413	40.87	13.85	0.9977	2925572	161023	9049	2.15
hn1414	50.05	16.97	0.9908	2945928	170735	9907	2.15
hn1415	39.95	13.57	0.9905	2930183	158877	8494	2.15
hn1416	42.98	14.61	0.9908	2936161	162388	9398	2.15
hn1417	46.99	15.94	0.9979	2950384	168240	9731	2.15
hn1418	36.62	12.44	0.9895	2932019	155509	9157	2.15
hn1419	38.17	12.97	0.9902	2925985	156617	8620	2.16
hn1420	31.41	10.67	0.9901	2913549	143728	8710	2.15
hn1421	33.6	11.43	0.99	2922927	149457	8407	2.16
hn1422	33.94	11.5	0.9903	2930539	150057	8774	2.15
hn1423	39.32	13.35	0.9977	2927967	159449	9143	2.15
hn1424	36.15	12.3	0.9901	2940495	155881	9401	2.15
hn1425	35.42	12.03	0.9903	2926346	152644	8666	2.15
hn1426	35.49	12.03	0.9974	2924720	154261	8755	2.15
hn1427	41.4	14.07	0.9903	2926295	160919	9848	2.15
hn1428	37.96	12.89	0.9904	2910225	155196	8945	2.15
hn1429	37.04	12.57	0.9975	2937136	156363	9565	2.15
hn1430	36.09	12.23	0.9975	2920239	153728	9257	2.15
hn1431	39.32	13.37	0.9902	2937694	159460	8773	2.15
hn1432	36.56	12.38	0.9974	2922372	154418	8948	2.15
hn1433	36.6	12.41	0.9901	2920287	154702	11914	2.15
hn1434	40.74	13.84	0.9903	2942272	161915	8456	2.15
hn1435	37.72	12.79	0.9902	2937799	157143	9741	2.15
hn1436	47.24	16.01	0.9977	2918743	167988	9302	2.15
hn1437	37.44	12.7	0.9974	2939324	157300	9558	2.15
hn1438	37.93	12.87	0.9963	2938855	158458	10392	2.15
hn1439	45.33	15.35	0.9979	2931599	166396	10996	2.15
hn1440	46.48	15.77	0.9904	2930538	167625	9468	2.15
hn1441	42.22	14.33	0.9904	2940677	164223	10232	2.15
hn1442	36.09	12.26	0.99	2945707	156595	7844	2.15
hn1443	39.33	13.35	0.9975	2945002	161444	8901	2.15
hn1444	33.94	11.54	0.99	2922029	149526	8535	2.15
hn1445	35.62	12.08	0.9973	2912509	153418	9045	2.15
hn1446	34.46	11.71	0.9972	2936207	153289	8826	2.15
hn1447	43	14.59	0.9904	2942801	164434	9776	2.15
hn1448	37.29	12.64	0.9973	2929460	157216	9260	2.15
hn1449	34.43	11.7	0.9899	2937114	152133	8638	2.15
hn1450	33.85	11.51	0.9899	2914199	150384	9151	2.15
hn1451	41.28	14.03	0.9906	2908553	159928	8878	2.15
hn1452	37.1	12.58	0.9972	2937365	155912	8538	2.15
hn1453	38.34	13	0.9973	2932273	158079	9102	2.15
hn1454	34.44	11.69	0.9897	2919070	149266	8176	2.15
hn1455	40.04	13.58	0.9903	2920604	158913	8330	2.15
hn1456	36.25	12.3	0.9902	2935509	152765	8703	2.15
hn1457	36.1	12.26	0.9976	2937096	155728	9022	2.15
hn1458	39.46	13.42	0.9902	2892730	158020	8600	2.15
hn1459	35.45	12.04	0.9972	2914985	154126	9181	2.15
hn1460	45.91	15.58	0.9904	2946064	166946	11481	2.15
hn1461	35.67	12.09	0.9975	2924942	153926	11688	2.15
hn1462	37.73	12.82	0.9901	2943864	157583	8873	2.15
hn1463	42.4	14.37	0.9978	2931871	163236	8419	2.15
hn1464	42.54	14.4	0.9977	2936906	164157	9124	2.15
hn1465	39.51	13.39	0.9977	2925209	159270	9445	2.15
hn1466	38.16	12.93	0.9978	2917677	157603	13226	2.15
hn1467	38.32	12.98	0.9974	2929615	158740	8563	2.15
hn1468	31.21	10.59	0.9971	2910804	145063	11472	2.15
hn1469	37.69	12.8	0.9902	2936910	157567	8918	2.15
hn1470	33.68	11.45	0.9902	2934091	150741	9467	2.15
hn1471	44.16	14.99	0.998	2920257	165145	9760	2.15
hn1472	37.32	12.68	0.9904	2947685	157858	9540	2.15
hn1473	34.4	11.69	0.9903	2909208	150120	8536	2.15
hn1474	33.71	11.46	0.9901	2911949	149872	8348	2.15
hn1475	42.23	14.31	0.9979	2951267	164329	9056	2.15
hn1476	38.93	13.21	0.9901	2914632	157036	8777	2.15
hn1477	36.61	12.43	0.9904	2940571	154877	8325	2.15
hn1478	35.86	12.18	0.9901	2921322	152967	8302	2.15
hn1479	40.08	13.57	0.9979	2929374	160822	8462	2.15
hn1480	34.24	11.63	0.9902	2917658	149603	8997	2.15
hn1481	34.72	11.79	0.9976	2919482	152418	8001	2.15
hn1482	39.98	13.57	0.9976	2951528	162690	9020	2.15
hn1483	36.5	12.39	0.9973	2927752	156606	8416	2.15
hn1484	45.31	15.36	0.9979	2930883	167852	9264	2.15
hn1485	34.49	11.71	0.9971	2940823	153992	9129	2.15
hn1486	38.03	12.92	0.9903	2926355	157012	8745	2.15
hn1487	45.17	15.31	0.998	2935472	167419	9075	2.15
hn1488	43.1	14.63	0.9905	2935518	164260	9052	2.15
hn1489	41.21	13.96	0.9976	2939302	163777	8765	2.15
hn1490	35.89	12.17	0.997	2920533	154773	8620	2.15
hn1491	39.04	13.25	0.9902	2929473	159234	9192	2.15
hn1492	31.89	10.83	0.99	2922488	145988	8584	2.15
hn1493	35.97	12.18	0.9972	2934077	155327	8146	2.15
hn1494	34.71	11.81	0.9901	2922344	152837	8799	2.15
hn1495	41.77	14.15	0.9976	2950097	164433	9789	2.15
hn1496	37.62	12.79	0.9901	2946055	158480	9018	2.15
hn1497	33.5	11.39	0.9901	2922427	150475	8929	2.15
hn1498	32.95	11.22	0.9898	2922456	149222	8409	2.15
hn1499	43.76	14.84	0.9902	2947871	165918	9807	2.15
hn1500	35.61	12.09	0.9973	2930621	154321	8885	2.15
hn1501	36.69	12.43	0.9978	2933182	156009	9055	2.15
hn1502	36.07	12.25	0.9901	2927801	153552	9365	2.15
hn1503	42.37	14.39	0.9904	2933560	162839	9480	2.15
hn1504	37.05	12.57	0.9902	2932208	154447	9391	2.15
hn1505	35.58	12.08	0.9973	2943866	155957	8628	2.15
hn1506	38.33	13.01	0.9972	2936594	159743	8741	2.15
hn1507	35.54	12.07	0.9904	2930505	154315	10852	2.15
hn1508	45.84	15.55	0.9903	2938355	166902	9053	2.15
hn1509	35.73	12.11	0.9903	2926581	152840	10094	2.15
hn1510	40.23	13.66	0.9904	2929135	160412	8900	2.15
hn1511	41.78	14.19	0.9904	2938327	162777	9536	2.15
hn1512	34.23	11.6	0.9973	2923523	152085	8588	2.15
hn1513	30.58	10.39	0.9897	2912208	143587	7781	2.15
hn1514	34.12	11.49	0.9903	2922283	150199	8728	2.15
hn1515	33.81	11.49	0.9899	2922570	150516	8773	2.15
hn1516	33.17	11.25	0.9973	2920390	149796	8709	2.15
hn1517	33.04	11.22	0.9971	2929349	151065	8611	2.15
hn1518	30.56	10.41	0.99	2893481	143567	7973	2.15
hn1519	34.22	11.61	0.9899	2926292	152379	9751	2.15
hn1520	33.45	11.21	0.9973	2916261	148665	8388	2.15
hn1521	38	12.72	0.9977	2929556	156968	9048	2.15
hn1522	32.51	10.92	0.9901	2906502	145281	8426	2.15
hn1523	34.93	11.73	0.9972	2930388	152079	9209	2.15
hn1524	30.67	10.31	0.9967	2905651	143812	9472	2.15
hn1525	39.64	13.29	0.9903	2938291	157968	8835	2.15
hn1526	34.63	11.63	0.9903	2920273	151237	10523	2.15
hn1527	35.24	11.84	0.9902	2900783	150548	8582	2.15
hn1528	33.34	11.31	0.997	2933023	152225	8619	2.15
hn1529	33.02	11.22	0.997	2942062	151157	8040	2.15
hn1530	40.87	13.86	0.9977	2940055	162652	9755	2.15
hn1531	32.36	10.99	0.9898	2919001	147085	12054	2.15
hn1532	38.76	13.14	0.9903	2925127	156803	8752	2.15
hn1533	43.8	14.85	0.9905	2938838	163074	9562	2.15
hn1534	32.99	11.21	0.9901	2908013	148555	8401	2.15
hn1535	30.37	10.3	0.9967	2901751	142736	8023	2.15
hn1536	34.43	11.71	0.9901	2923465	150436	8592	2.15
hn1537	39.65	13.46	0.9975	2903211	157590	8858	2.15
hn1538	35.05	11.9	0.9973	2916905	150772	8263	2.15
hn1539	35.39	11.95	0.9972	2919569	153156	8979	2.15
hn1540	39.11	13.21	0.9975	2942237	160019	9125	2.15
hn1541	33.34	11.27	0.99	2910796	147280	8024	2.15
hn1542	35.8	12.09	0.9973	2914054	152526	8871	2.15
hn1543	35.13	11.87	0.9973	2934755	153618	8756	2.15
hn1544	41.52	14.03	0.9955	2934829	162427	9711	2.15
hn1545	37.87	12.8	0.9974	2939458	159130	8971	2.15
hn1546	37.14	12.54	0.9903	2933145	155739	9441	2.15
hn1547	34.61	11.7	0.9972	2918111	152715	8802	2.15
hn1548	42.87	14.49	0.9906	2929724	162456	9113	2.15
hn1549	39.77	13.39	0.9976	2937443	158912	9556	2.15
hn1550	38.61	13.05	0.9903	2922467	155841	8792	2.15
hn1551	39.42	13.33	0.9904	2933985	158985	8720	2.15
hn1552	42.7	14.41	0.9904	2942477	164694	9888	2.15
hn1553	37.49	12.63	0.9974	2923770	154442	8779	2.15
hn1554	38.93	13.1	0.9976	2927780	158135	8877	2.15
hn1555	39.02	13.17	0.9978	2951016	160259	9042	2.15
hn1556	36.96	12.5	0.9902	2930631	156082	8707	2.15
hn1557	44.91	15.15	0.9904	2940044	166174	10025	2.15
hn1558	36.39	12.3	0.9901	2937188	153971	8832	2.15
hn1559	39.65	13.38	0.9905	2934740	158890	8287	2.15
hn1560	43.72	14.76	0.9979	2921683	163176	13990	2.15
hn1561	45	15.18	0.998	2950383	167547	8973	2.15
hn1562	41.32	13.94	0.9976	2920635	161763	8539	2.15
hn1563	37.47	12.64	0.9973	2924086	156119	8238	2.15
hn1564	39.49	13.33	0.9903	2929002	158991	9588	2.15
hn1565	34.72	11.73	0.9972	2918817	150522	9533	2.15
hn1566	35.5	11.97	0.9901	2922471	151047	8458	2.15
hn1567	35.17	11.9	0.9903	2924847	152437	10945	2.15
hn1568	41.81	14.12	0.9978	2939584	163578	9109	2.15
hn1569	37.05	12.55	0.9901	2940565	157430	8393	2.15
hn1570	36.68	12.39	0.9974	2917938	155962	10397	2.15
hn1571	36.56	12.37	0.99	2929258	155572	9032	2.15
hn1572	42.85	14.46	0.9974	2950144	166857	10192	2.15
hn1573	38.93	13.15	0.9903	2942333	158152	8204	2.15
hn1574	37.17	12.57	0.9971	2920733	155648	9280	2.15
hn1575	35.87	12.12	0.9974	2921396	153024	8967	2.15
hn1576	40.71	13.75	0.9903	2938784	160930	9643	2.15
hn1577	39.89	13.44	0.9903	2921299	158089	9025	2.15
hn1578	37.64	12.58	0.9903	2922724	154367	9040	2.15
hn1579	39.74	13.4	0.9975	2931928	161736	10530	2.15
hn1580	35.82	12.11	0.9901	2905085	152641	8551	2.15
hn1581	43.94	14.82	0.9906	2945876	166017	10683	2.15
hn1582	35.25	11.91	0.9901	2940994	152519	8094	2.15
hn1583	37.67	12.73	0.9901	2930000	155656	10175	2.15
hn1584	44.46	14.98	0.9979	2959356	167698	12496	2.15
hn1585	43.09	14.57	0.9905	2946492	163701	9034	2.15
hn1586	40.82	13.76	0.9978	2938583	162518	8611	2.15
hn1587	31.94	10.79	0.9967	2914639	147012	9618	2.15
hn1588	38.34	12.93	0.9901	2885519	153552	8701	2.15
hn1589	38.16	12.86	0.9905	2923091	157101	10013	2.15
hn1590	39.14	13.21	0.9904	2918235	157669	8104	2.15
hn1591	35.73	12.09	0.9903	2940032	154223	8775	2.15
hn1592	42.77	14.41	0.9978	2941143	164646	8731	2.15
hn1593	34.56	11.67	0.9973	2918574	150954	8675	2.15
hn1594	44.16	14.91	0.9977	2937521	166200	9829	2.15
hn1595	42.94	14.52	0.9906	2935117	162671	9752	2.15
hn1596	33.87	11.35	0.99	2927146	151001	8988	2.15
hn1597	38.22	12.78	0.9905	2944053	158666	8419	2.15
hn1598	33.13	11.07	0.99	2914536	147366	8921	2.15
hn1599	35.76	11.97	0.9903	2919114	153569	10315	2.15
hn1600	36.19	12.13	0.9903	2930371	154885	8628	2.15
hn1601	41.35	13.82	0.9975	2936802	163376	9740	2.15
hn1602	37.9	12.73	0.9904	2933648	156910	9072	2.15
hn1603	36.86	12.32	0.9976	2919609	155587	8522	2.15
hn1604	32.35	10.83	0.9901	2924065	147980	8302	2.15
hn1605	41.49	13.87	0.9977	2942907	162721	9122	2.15
hn1606	38.53	12.84	0.9976	2935290	158498	8647	2.15
hn1607	37.67	12.61	0.9904	2926101	156009	8147	2.15
hn1608	35.16	11.77	0.9973	2924792	152269	8212	2.15
hn1609	39.59	13.24	0.9903	2934958	160378	10241	2.15
hn1610	36.08	12.02	0.9975	2935079	153921	9246	2.15
hn1611	35.15	11.68	0.9901	2923562	151410	7851	2.15
hn1612	36.45	12.18	0.9976	2942134	157341	10164	2.15
hn1613	31.78	10.63	0.99	2921218	146600	7835	2.15
hn1614	43.71	14.59	0.9979	2940737	166388	9489	2.15
hn1615	33.95	11.32	0.9973	2927588	150222	8360	2.15
hn1616	39.26	13.11	0.9975	2939119	160329	9353	2.15
hn1617	46.62	15.51	0.9979	2951363	168718	9468	2.15
hn1618	35.47	12.03	0.9973	2939443	154081	10150	2.15
hn1619	37.89	12.88	0.9902	2938468	158402	9931	2.15
hn1620	32.73	11.11	0.9899	2912280	144698	8371	2.15
hn1621	36.31	12.32	0.997	2936718	155361	8778	2.15
hn1622	35.74	12.13	0.9901	2940614	155240	8802	2.15
hn1623	43.14	14.61	0.9904	2942187	163979	9860	2.15
hn1624	37.05	12.57	0.9976	2940687	158452	9064	2.15
hn1625	37.96	12.89	0.9972	2855378	154136	8007	2.15
hn1626	32.4	11.02	0.99	2921471	148671	8257	2.15
hn1627	39.97	13.57	0.9902	2926066	158683	8552	2.15
hn1628	34.72	11.79	0.9903	2931096	149938	9091	2.15
hn1629	36.81	12.51	0.9902	2932163	154928	8772	2.15
hn1630	36.46	12.28	0.9903	2918984	151735	9594	2.15
hn1631	39.78	13.5	0.9904	2921376	158020	9020	2.15
hn1632	35.13	11.93	0.9899	2938460	151595	8450	2.15
hn1633	35.96	12.22	0.9902	2921386	152865	8347	2.15
hn1634	37.03	12.56	0.9975	2933059	156655	9697	2.15
hn1635	35.04	11.91	0.9901	2931197	152385	9609	2.15
hn1636	42.37	14.39	0.9905	2935035	162707	10302	2.15
hn1637	35.51	12.05	0.9974	2939334	153051	12371	2.15
hn1638	38.84	13.17	0.9902	2930710	158173	9929	2.15
hn1639	43.58	14.78	0.9904	2947343	166047	12698	2.15
hn1640	43.33	14.69	0.9976	2938366	163735	8624	2.15
hn1641	42.48	14.42	0.9903	2943355	162259	9197	2.15
hn1642	33.08	11.26	0.99	2922163	148911	8914	2.15
hn1643	36.36	12.36	0.9974	2927289	156208	9617	2.15
hn1644	30.52	10.38	0.9898	2911875	142574	7889	2.15
hn1645	36.09	12.25	0.9974	2921563	153938	8777	2.15
hn1646	34.68	11.79	0.9973	2931354	153845	8755	2.15
hn1647	41.09	13.94	0.9977	2949289	163609	9557	2.15
hn1648	35.27	11.98	0.9975	2932716	154267	8163	2.15
hn1649	38.29	13	0.9972	2893244	156319	8676	2.15
hn1650	31.68	10.78	0.99	2914691	145961	8483	2.15
hn1651	41.45	14.06	0.9978	2941453	163359	9560	2.15
hn1652	36.67	12.44	0.9904	2936989	153258	9785	2.15
hn1653	39.19	13.3	0.9902	2920253	156879	8749	2.15
hn1654	37.03	12.57	0.9975	2940209	156951	10478	2.15
hn1655	43.17	14.61	0.9977	2944959	166409	14020	2.15
hn1656	35.47	12.03	0.9974	2941710	152374	8417	2.15
hn1657	39.12	13.29	0.9901	2928335	159708	9777	2.15
hn1658	35.68	12.13	0.9901	2928143	153915	8570	2.15
hn1659	35.02	11.9	0.9903	2937030	152856	8716	2.15
hn1660	41.84	14.18	0.9976	2935380	163094	8385	2.15
hn1661	36.11	12.25	0.9973	2926926	154134	8709	2.16
hn1662	38.79	13.15	0.9977	2879768	156170	9885	2.15
hn1663	43.39	14.73	0.9902	2947335	165567	9308	2.15
hn1664	43.1	14.63	0.9905	2950365	165493	9510	2.15
hn1665	42.1	14.29	0.9905	2939124	162539	9293	2.15
hn1666	32.31	10.98	0.9901	2922639	147012	9066	2.15
hn1667	37.24	12.65	0.9976	2931473	158674	9643	2.15
hn1668	31.13	10.57	0.9898	2915808	142762	7882	2.15
hn1669	36.61	12.42	0.9901	2938275	155504	8768	2.15
hn1670	37.75	12.82	0.9977	2927150	155614	8180	2.15
hn1671	37.8	12.82	0.9974	2920656	155507	9200	2.15
hn1672	44.06	14.94	0.9979	2941348	165000	8566	2.15
hn1673	40.07	13.61	0.9905	2929636	159797	8984	2.15
hn1674	38.94	13.22	0.9904	2924285	156951	11977	2.15
hn1675	35.28	11.97	0.9974	2920404	152432	9218	2.15
hn1676	43.09	14.64	0.9903	2935900	162034	8841	2.15
hn1677	38.62	13.12	0.9902	2932082	156284	8763	2.15
hn1678	37.77	12.85	0.9902	2930599	154732	9449	2.15
hn1679	36.86	12.51	0.9975	2932618	155081	8346	2.15
hn1680	41.97	14.25	0.9905	2931833	160790	9742	2.15
hn1681	37.04	12.57	0.9904	2916343	152340	9262	2.15
hn1682	37.88	12.83	0.9974	2944393	157152	8288	2.15
hn1683	42.53	14.44	0.9902	2935109	162388	9907	2.15
hn1684	38.76	13.17	0.9905	2936111	158078	9041	2.15
hn1685	44.57	15.14	0.9905	2932536	164254	9143	2.15
hn1686	34.9	11.86	0.9902	2922187	149864	8561	2.15
hn1687	38.06	12.92	0.9904	2938708	156706	9347	2.15
hn1688	42.68	14.48	0.9906	2945762	162286	9045	2.15
hn1689	44.61	15.11	0.9976	2938405	165417	10071	2.15
hn1690	42.55	14.43	0.9904	2935779	161300	9230	2.15
hn1691	36.23	12.31	0.9904	2913708	152921	8486	2.15
hn1692	40.05	13.6	0.9904	2942200	160556	9718	2.15
hn1693	34.31	11.67	0.9902	2912594	149416	8999	2.15
hn1694	36.63	12.45	0.9901	2924371	153664	9128	2.15
hn1695	35.95	12.21	0.9972	2934614	155367	8662	2.15
hn1696	41.58	14.1	0.9977	2942126	163058	10122	2.15
hn1697	37.15	12.63	0.99	2926632	156044	8835	2.15
hn1698	38.01	12.89	0.9901	2896390	155258	8759	2.15
hn1699	36.47	12.09	0.9975	2933662	154801	7471	2.15
hn1700	42.71	14.51	0.9904	2926728	161929	9388	2.15
hn1701	38.77	13.17	0.9904	2935024	156264	8970	2.15
hn1702	38.72	13.14	0.9904	2924702	157209	10333	2.15
hn1703	36.05	12.24	0.9903	2940807	154952	9095	2.15
hn1704	41.57	14.12	0.9902	2943355	162098	8933	2.15
hn1705	37.41	12.69	0.9901	2930803	154938	9170	2.15
hn1706	40.09	13.58	0.9978	2948371	161480	10029	2.15
hn1707	40.25	13.67	0.9904	2934759	160151	9724	2.15
hn1708	38.86	13.21	0.9901	2931913	158362	9338	2.15
hn1709	46.4	15.74	0.9978	2943407	167790	9354	2.15
hn1710	35.8	12.15	0.9974	2925870	153745	8943	2.15
hn1711	38.08	12.92	0.9903	2864339	152383	8950	2.15
hn1712	45.03	15.29	0.9906	2947415	167236	10277	2.15
hn1713	46.06	15.64	0.9903	2944190	168051	9197	2.15
hn1714	43.6	14.8	0.9904	2949139	165030	9617	2.15
hn1715	36.1	12.27	0.9899	2924254	153421	9166	2.15
hn1716	41.56	14.1	0.9977	2934947	161317	10969	2.15
hn1717	35.49	12.06	0.9902	2923001	151095	9099	2.15
hn1718	38.78	13.14	0.9976	2940649	158511	10172	2.15
hn1719	36.91	12.53	0.9973	2926888	155144	9544	2.15
hn1720	42	14.26	0.9978	2948506	163076	9189	2.15
hn1721	38.7	13.15	0.9978	2934042	158626	8899	2.16
hn1722	37.16	12.59	0.9974	2913543	154571	8221	2.15
hn1723	37.68	12.8	0.9974	2936669	157730	8972	2.15
hn1724	46.51	15.75	0.9979	2916117	165631	9650	2.15
hn1725	41.06	13.89	0.9979	2948175	160495	9573	2.15
hn1726	41.43	14.06	0.9979	2942331	162139	9567	2.15
hn1727	38.84	13.15	0.9976	2901793	155948	8612	2.15
hn1728	41.98	14.2	0.9978	2938570	162597	13387	2.15
hn1729	38.31	13.01	0.9905	2931953	155207	8941	2.15
hn1730	37.98	12.89	0.9976	2942178	157526	10294	2.15
hn1731	39.64	13.47	0.9902	2887139	155864	8965	2.15
hn1732	37.87	12.87	0.9904	2938672	156389	8819	2.15
hn1733	46.76	15.85	0.9906	2936539	165541	8889	2.15
hn1734	36.66	12.45	0.9901	2925279	152944	9266	2.15
hn1735	38.94	13.23	0.9903	2934658	157364	9076	2.15
hn1736	41.34	14.06	0.9905	2922807	158671	9019	2.15
hn1737	36.71	12.41	0.99	2935375	160912	12931	2.15
hn1738	40.28	13.58	0.9979	2938544	164363	12952	2.15
hn1739	29.97	9.56	0.9877	2853985	123496	6367	2.15
hn1740	30.21	10.03	0.9898	2904711	145796	8832	2.15
hn1741	31.56	10.64	0.9899	2901662	145271	7894	2.15
hn1742	36.87	11.31	0.99	2886009	145635	6738	2.16
hn1743	35.45	11.05	0.9962	2899467	150332	7241	2.15
hn1744	34.09	11.47	0.9974	2931764	150369	11740	2.15
hn1745	36.17	12.14	0.9903	2938347	157740	8785	2.15
hn1746	33.69	10.68	0.9899	2897246	148193	5307	2.15
hn1747	35.51	11.18	0.9901	2902938	153803	7554	2.15
hn1748	33.67	11.36	0.9972	2932861	151364	10185	2.15
hn1749	36.54	12.33	0.9902	2916710	154266	8000	2.15
hn1750	41.23	13.89	0.9978	2943951	164231	10023	2.15
hn1751	44.74	15.05	0.9905	2924982	156791	9303	2.15
hn1752	44.21	14.81	0.997	2864481	152617	8708	2.15
hn1753	43.98	14.81	0.9978	2948977	170014	9026	2.15
hn1754	44.91	15.16	0.9905	2943027	169224	9745	2.15
hn1755	40.21	13.58	0.9903	2932332	161772	9706	2.15
hn1756	41.54	14.05	0.9904	2924619	162453	9256	2.15
hn1757	38.53	13.03	0.9903	2943447	160993	9084	2.15
hn1758	47.91	16.15	0.9975	2943577	170640	9489	2.15
hn1759	43.29	14.64	0.9906	2935433	166406	9739	2.15
hn1760	43.22	14.6	0.9904	2934977	167841	9096	2.15
hn1761	41.21	13.9	0.9974	2926820	162887	8955	2.15
hn1762	50.9	17.18	0.9905	2939890	175759	9060	2.15
hn1763	44.38	14.96	0.9979	2942741	170665	10616	2.15
hn1764	42.62	14.4	0.9906	2954414	166706	9395	2.15
hn1765	42.29	14.29	0.9905	2945715	167823	9598	2.15
hn1766	44.39	14.94	0.9978	2936699	170799	13973	2.15
hn1767	42.95	14.48	0.9975	2938590	161093	9072	2.15
hn1768	42.29	14.23	0.9904	2940760	167042	10528	2.15
hn1769	45.83	15.44	0.9979	2939525	170691	9269	2.15
hn1770	41.34	13.98	0.9904	2930495	163080	9353	2.15
hn1771	50.36	16.99	0.9907	2938707	172788	9440	2.15
hn1772	38.44	12.95	0.9904	2945648	159573	9261	2.15
hn1773	45.63	15.37	0.9905	2922053	169907	9033	2.15
hn1774	48.22	16.29	0.9905	2936789	174168	10707	2.15
hn1775	37.93	12.68	0.9974	2917965	154088	8464	2.15
hn1776	39.34	13.16	0.9974	2934161	156597	8890	2.15
hn1777	34.69	11.64	0.9901	2912603	147707	8480	2.15
hn1778	37.1	12.44	0.9969	2922188	153393	12603	2.15
hn1779	35.7	11.99	0.9903	2914762	148610	8575	2.15
hn1780	41.89	14.06	0.9906	2908085	157061	8690	2.15
hn1781	36.77	12.33	0.9901	2933330	151800	8338	2.15
hn1783	36.89	12.37	0.9903	2938284	153152	9295	2.15
hn1784	44.18	14.79	0.9978	2948860	164006	10344	2.15
hn1785	38.78	12.97	0.9903	2939412	154977	8480	2.15
hn1786	39.32	13.15	0.9976	2939715	157555	9924	2.15
hn1787	35.6	11.91	0.9974	2923449	149905	8043	2.15
hn1788	40.24	13.45	0.9972	2930640	157652	9173	2.15
hn1789	37.64	12.56	0.9972	2921650	152360	8397	2.15
hn1790	39.41	13.16	0.9976	2927115	155905	8909	2.15
hn1791	42.79	14.24	0.9976	2927787	162742	9286	2.15
hn1792	37.15	12.38	0.9902	2915204	151413	7503	2.15
hn1793	43.96	14.69	0.9906	2922252	160952	8657	2.15
hn1794	35.56	11.8	0.9972	2920572	150230	8541	2.15
hn1795	37.76	12.62	0.9905	2919689	152765	8256	2.15
hn1796	42.79	14.25	0.9977	2937923	160697	9083	2.15
hn1797	43.85	14.62	0.9977	2929211	162596	9648	2.15
hn1798	41.55	13.84	0.9977	2921138	158429	8751	2.15
hn1799	37.87	12.66	0.9976	2936713	156146	11993	2.15
hn1800	40.64	13.58	0.9976	2917928	157303	8503	2.15
hn1801	33.45	11.2	0.99	2909304	143945	8442	2.16
hn1802	34.59	11.59	0.9903	2865418	144602	7382	2.15
hn1803	35.29	11.84	0.9903	2923939	149187	8905	2.15
hn1804	42.44	14.21	0.9975	2921550	159903	8680	2.15
hn1805	38.27	12.84	0.9902	2932334	154790	8839	2.15
hn1806	37.96	12.71	0.9974	2917098	153786	9675	2.15
hn1807	38.15	12.77	0.9973	2925961	155272	8693	2.15
hn1808	42.37	14.17	0.9977	2933964	160194	8529	2.15
hn1809	39.23	13.09	0.9903	2927041	155113	8589	2.15
hn1810	39.11	13.11	0.9904	2939966	155176	8736	2.15
hn1811	34.96	11.73	0.99	2914412	146917	8413	2.15
hn1812	40.61	13.52	0.9975	2940849	158576	8192	2.15
hn1813	39.14	13.11	0.9902	2921064	154251	9197	2.15
hn1814	39.54	13.25	0.9902	2928474	156083	9064	2.15
hn1815	39.77	13.26	0.9902	2934554	157744	10896	2.15
hn1816	36.31	12.14	0.9971	2939342	153596	8477	2.15
hn1817	45.73	15.25	0.9977	2937693	166309	8435	2.15
hn1818	37.62	12.53	0.9973	2928956	154045	8362	2.15
hn1819	38.31	12.84	0.9905	2938288	155068	8238	2.15
hn1820	43.15	14.42	0.9979	2945241	161205	9870	2.15
hn1821	46.12	15.44	0.998	2938056	164608	10011	2.15
hn1822	41.11	13.76	0.9905	2924778	157433	9560	2.15
hn1823	36.94	12.36	0.9974	2930868	152970	8666	2.15
hn1824	39.04	13.07	0.9975	2933747	155948	8635	2.15
hn1825	34.53	11.56	0.9902	2934323	148458	8314	2.15
hn1826	36.94	12.4	0.9972	2935646	153206	10041	2.15
hn1827	34.57	11.61	0.99	2919320	147310	7894	2.15
hn1828	44.01	14.75	0.9978	2948537	163160	9796	2.15
hn1829	41.87	14.04	0.9904	2943812	160090	9293	2.15
hn1830	38.8	13	0.9976	2926993	155679	8891	2.15
hn1831	38.43	12.9	0.9975	2926744	155818	9304	2.15
hn1832	44	14.74	0.9905	2943079	161922	9410	2.15
hn1833	37.1	12.43	0.9901	2927411	151572	9022	2.15
hn1834	37.33	12.5	0.9903	2928251	151064	8565	2.15
hn1835	35.18	11.79	0.9899	2905550	146592	7564	2.15
hn1836	38.69	12.94	0.9902	2924614	154061	8431	2.15
hn1837	38.05	12.73	0.9904	2921948	152571	8975	2.16
hn1838	37.46	12.55	0.9904	2914352	151945	9646	2.15
hn1839	37.19	12.39	0.9901	2922458	152121	8361	2.15
hn1840	38.18	12.67	0.9974	2915903	153432	8218	2.15
hn1841	42.76	14.31	0.9976	2928853	160352	8467	2.15
hn1842	36.17	12.11	0.9902	2929416	151117	8843	2.15
hn1843	41.63	14.01	0.9904	2931914	158865	9530	2.15
hn1844	44.38	14.91	0.9904	2932522	161887	8895	2.15
hn1845	46.55	15.6	0.9905	2940220	165065	10487	2.15
hn1846	43.88	14.69	0.9975	2925906	161539	9594	2.15
hn1847	37.84	12.7	0.9973	2924289	154834	11411	2.15
hn1848	40.62	13.61	0.9975	2920260	157228	10251	2.15
hn1849	31.33	10.53	0.9897	2917634	141802	7709	2.15
hn1850	36.64	12.33	0.9902	2921889	150959	9185	2.15
hn1851	35.77	12.01	0.997	2913545	151280	8499	2.15
hn1852	43.69	14.69	0.9907	2948999	162643	9231	2.15
hn1853	39.78	13.37	0.9974	2928886	158160	9175	2.15
hn1854	36.16	12.12	0.9903	2925126	151008	8268	2.15
hn1855	36.39	12.23	0.9972	2912659	152026	8586	2.15
hn1856	45.36	15.19	0.9981	2922364	163268	9230	2.15
hn1857	37.52	12.58	0.9905	2914992	150779	8133	2.15
hn1858	36.97	12.39	0.9973	2918022	151714	10134	2.15
hn1859	35.25	11.83	0.9971	2918083	149468	8336	2.15
hn1860	40.83	13.64	0.9976	2936213	159219	8958	2.15
hn1861	38.13	12.76	0.9975	2920226	153247	8516	2.15
hn1862	39.46	13.2	0.9905	2932540	156348	8929	2.15
hn1863	40.77	13.58	0.9902	2929663	157943	8525	2.15
hn1864	37.17	12.41	0.9975	2926758	153687	8639	2.15
hn1865	41.25	13.78	0.9976	2931806	158242	9032	2.15
hn1866	33.64	11.2	0.9971	2912061	146006	8294	2.16
hn1867	42.62	14.25	0.9975	2938028	162870	8847	2.15
hn1868	45.21	15.12	0.9905	2941278	162691	8664	2.15
hn1869	36.43	12.32	0.9903	2934261	153903	9179	2.15
hn1870	38.25	12.93	0.9902	2934019	156414	8930	2.15
hn1871	44.74	15.06	0.998	2938693	165967	9388	2.15
hn1872	42.65	14.4	0.9903	2934221	163329	13907	2.15
hn1873	37.88	12.79	0.9902	2939511	157078	9155	2.15
hn1874	34.41	11.6	0.9974	2916527	151142	8327	2.15
hn1875	30.05	10.16	0.9897	2907322	140425	9733	2.15
hn1876	39.3	13.28	0.9902	2957790	160623	8602	2.15
hn1877	33.18	11.23	0.99	2924492	149214	7247	2.15
hn1878	37.92	12.8	0.9975	2919743	156445	9238	2.15
hn1879	38.71	13.07	0.9975	2922900	158181	9828	2.15
hn1880	37.41	12.65	0.9902	2921101	155994	8874	2.15
hn1881	40.56	13.71	0.9902	2867296	156502	8582	2.15
hn1882	43.69	14.72	0.9979	2949555	166420	10137	2.15
hn1883	36.85	12.45	0.9902	2938968	154322	9091	2.15
hn1884	40.85	13.76	0.9977	2937173	161884	9560	2.15
hn1885	34.44	11.63	0.9903	2919456	149889	9932	2.15
hn1886	35.73	12.05	0.9976	2936047	154414	8478	2.15
hn1887	35.69	12.03	0.9975	2929310	152142	8570	2.15
hn1888	39.53	13.34	0.9977	2937045	160342	9910	2.15
hn1889	45.19	15.22	0.9905	2916291	164601	9922	2.15
hn1890	36.31	12.26	0.9973	2928179	156273	8591	2.15
hn1891	43.64	14.72	0.9906	2933969	164891	8865	2.15
hn1892	39.68	13.35	0.9905	2935125	158452	9072	2.15
hn1893	36.2	12.23	0.9974	2929467	154613	8864	2.15
hn1894	38.55	13.03	0.9975	2932141	157723	8614	2.15
hn1895	45.34	15.32	0.9979	2942093	168305	9370	2.15
hn1896	46.31	15.62	0.9903	2935253	168725	10723	2.15
hn1897	39.25	13.27	0.9977	2925054	159353	9255	2.15
hn1898	39.83	13.45	0.9978	2934934	160702	8425	2.15
hn1899	35.04	11.82	0.9904	2927689	152322	10215	2.15
hn1900	42.18	14.22	0.9976	2933127	163926	8915	2.15
hn1901	35.09	11.84	0.9972	2928697	154094	12932	2.15
hn1902	38.78	13.09	0.9976	2951454	161260	9898	2.15
hn1903	39.17	13.22	0.9977	2938541	160935	11784	2.15
hn1904	40.11	13.54	0.9979	2936973	162749	9546	2.15
hn1905	33.57	11.35	0.9974	2936705	151570	8125	2.15
hn1906	42.61	14.39	0.9905	2935954	164207	9048	2.15
hn1907	38.16	12.88	0.9974	2937658	158244	8750	2.15
hn1908	35.88	12.11	0.9973	2925664	153677	8565	2.15
hn1909	36.84	12.44	0.9903	2922341	152449	8608	2.16
hn1910	39.05	13.19	0.9901	2933983	159012	10528	2.15
hn1911	39.34	13.26	0.9977	2937646	159256	9230	2.15
hn1912	35.28	11.93	0.9899	2832081	148774	7747	2.15
hn1913	42.93	14.47	0.9906	2925426	162886	8890	2.15
hn1914	34.34	11.62	0.9901	2914480	149752	8012	2.15
hn1915	44.41	14.99	0.9905	2952605	166563	9066	2.15
hn1916	37.67	12.68	0.9978	2927850	155627	9506	2.15
hn1917	37.03	12.51	0.9903	2922064	154905	8516	2.15
hn1918	40.03	13.48	0.9977	2932828	159846	9140	2.15
hn1919	48.54	16.39	0.9905	2940486	169253	9197	2.15
hn1920	42.94	14.51	0.9906	2928334	163570	10394	2.15
hn1921	38.83	13.09	0.9906	2933625	158054	9399	2.15
hn1922	37.45	12.64	0.9975	2925390	156875	7899	2.15
hn1923	31.97	10.8	0.997	2899449	144155	9044	2.15
hn1924	38.3	12.93	0.9905	2937394	156651	9290	2.15
hn1925	32.86	11.09	0.9901	2928204	147954	8120	2.15
hn1926	38.32	12.93	0.9976	2925512	157493	9378	2.15
hn1927	40.02	13.49	0.9977	2921038	159862	9070	2.15
hn1928	39.12	13.21	0.9904	2944503	160613	8799	2.15
hn1929	40.56	13.65	0.991	2896750	158137	10101	2.15
hn1930	39.48	13.34	0.9974	2930417	159306	8959	2.15
hn1931	36.79	12.4	0.9975	2927731	154329	8689	2.15
hn1932	41.82	14.1	0.9904	2935810	160795	9228	2.15
hn1933	34.31	11.59	0.9903	2921251	148898	8181	2.15
hn1934	36.59	12.34	0.9904	2923554	153331	8611	2.15
hn1935	41.11	13.84	0.9979	2932884	159660	8987	2.15
hn1936	41.52	14.01	0.9979	2942303	164027	8832	2.15
hn1937	44.4	14.94	0.9977	2944651	166720	9579	2.15
hn1938	33.9	11.43	0.9901	2929295	150661	8395	2.15
hn1939	42.66	14.41	0.9904	2932396	162927	9086	2.15
hn1940	36.84	12.42	0.9905	2937639	154858	9191	2.15
hn1941	37.67	12.73	0.9975	2937657	157469	8411	2.15
hn1942	41.72	14.07	0.9976	2949992	163967	9263	2.15
hn1943	39.61	13.4	0.9904	2942759	160270	7601	2.15
hn1944	41.83	14.17	0.9975	2928031	162951	9189	2.15
hn1945	35.28	11.96	0.9904	2914364	151132	7234	2.15
hn1946	37.57	12.73	0.9905	2927225	156099	9380	2.15
hn1947	37.91	12.85	0.9903	2921305	156222	8440	2.15
hn1948	42.7	14.46	0.9906	2930300	162043	9343	2.15
hn1949	36.77	12.47	0.9904	2913452	154121	8911	2.15
hn1950	35.59	12.06	0.9901	2932176	152708	10321	2.15
hn1951	36.67	12.42	0.9902	2921173	154118	8434	2.15
hn1952	44.34	15.01	0.9909	2940666	164777	9522	2.15
hn1953	39.59	13.4	0.9977	2938786	160117	9022	2.15
hn1954	38.81	13.15	0.9902	2926636	157446	8275	2.15
hn1955	36.19	12.25	0.9901	2929120	154273	8824	2.15
hn1956	41.3	13.96	0.9906	2938114	160879	9306	2.15
hn1957	37.15	12.57	0.9903	2921428	154602	9301	2.15
hn1958	38.36	13	0.9904	2932713	158251	9180	2.15
hn1959	42.38	14.27	0.9979	2944374	164364	9924	2.15
hn1960	35.89	12.14	0.9975	2918466	153849	8472	2.15
hn1961	43.37	14.65	0.9978	2933688	164288	9623	2.15
hn1962	36.54	12.32	0.9974	2936726	156562	8000	2.15
hn1963	38.58	13.08	0.9903	2926925	157923	11719	2.16
hn1964	42.14	14.29	0.9903	2938994	163571	9480	2.15
hn1965	43.23	14.63	0.998	2940187	165424	10525	2.15
hn1966	38.86	12.92	0.9977	2914651	156988	8517	2.15
hn1967	35.91	12.18	0.99	2922557	153412	8015	2.15
hn1968	40.69	13.76	0.9979	2935495	161649	9237	2.15
hn1969	34.57	11.7	0.9972	2930049	151870	8264	2.15
hn1970	37.28	12.63	0.9902	2938648	156960	9094	2.15
hn1971	36.44	12.35	0.9902	2933027	156038	8998	2.15
hn1972	41.59	14.08	0.9905	2938134	161108	10277	2.15
hn1973	36.01	12.22	0.9903	2935657	153789	8516	2.15
hn1974	36.53	12.35	0.9976	2931404	155316	13210	2.15
hn1975	36.81	12.47	0.9902	2930971	155595	9273	2.15
hn1976	43.04	14.57	0.9903	2934037	162618	10148	2.15
hn1977	38.85	13.16	0.9904	2934482	157494	8597	2.15
hn1978	39.29	13.32	0.9977	2939914	159689	8359	2.15
hn1979	38.44	12.99	0.9977	2932027	158018	9374	2.15
hn1980	40.08	13.56	0.9978	2920723	159528	9642	2.15
hn1981	35.37	11.99	0.9902	2937348	151990	8542	2.15
hn1982	37.22	12.62	0.99	2924500	154898	9483	2.15
hn1983	41.93	14.19	0.9978	2937436	163281	9103	2.15
hn1984	37.2	12.59	0.9973	2923396	156118	10841	2.15
hn1985	47.34	16.04	0.9903	2919097	166845	8962	2.15
hn1986	35.99	12.18	0.9901	2919908	151699	9611	2.15
hn1987	38.71	13.12	0.9976	2942888	158707	8950	2.15
hn1988	43.36	14.68	0.9906	2939625	163496	9295	2.15
hn1989	43.28	14.68	0.9904	2947267	163696	8869	2.15
hn1990	41.57	14.09	0.9905	2935564	160097	8246	2.15
hn1991	37.2	12.59	0.9974	2920684	155260	8672	2.15
hn1992	38.41	13.01	0.9974	2929496	158185	9020	2.15
hn1993	33.53	11.37	0.9899	2913551	148030	8707	2.15
hn1994	36.35	12.3	0.9972	2921220	154111	8301	2.15
hn1995	36.1	12.24	0.9901	2927492	154007	9451	2.15
hn1996	39.28	13.3	0.9977	2923990	158295	9983	2.15
hn1997	38.2	12.94	0.9973	2937699	159455	8571	2.15
hn1998	37.39	12.67	0.9903	2934034	156003	8804	2.15
hn1999	35.79	12.13	0.9903	2924124	154148	8726	2.15
hn2000	43.85	14.86	0.9906	2921800	164685	9339	2.15
hn2001	39.65	13.4	0.9976	2929078	159001	9105	2.15
hn2002	37.67	12.73	0.9976	2918090	155882	8736	2.15
hn2003	38.91	13.19	0.99	2925495	158524	10416	2.15
hn2004	41.05	13.87	0.9979	2940583	162906	8892	2.15
hn2005	38.59	13.03	0.9976	2919313	157336	8952	2.15
hn2006	39.65	13.41	0.9977	2947264	162041	8797	2.15
hn2007	41.32	13.99	0.9905	2948190	162613	9315	2.15
hn2008	38.14	12.9	0.9904	2940102	158991	8894	2.15
hn2009	45.75	15.48	0.9906	2945264	167425	9904	2.16
hn2010	38.03	12.86	0.9902	2938307	158455	10879	2.15
hn2011	38.33	12.97	0.9975	2934036	159430	8098	2.15
hn2012	42.46	14.4	0.9905	2924515	163291	13999	2.15
hn2013	44.77	15.13	0.9973	2930806	167197	8952	2.15
hn2014	43.54	14.72	0.9977	2948014	167413	8912	2.15
hn2015	37.28	12.6	0.9978	2934975	158081	9111	2.15
hn2016	48.23	16.25	0.9979	2931265	169963	9090	2.15
hn2017	43.38	14.66	0.9905	2930179	164231	10615	2.15
hn2018	44.79	15.12	0.9979	2936836	165960	12353	2.15
hn2019	41.46	14.03	0.9903	2937777	162224	8561	2.15
hn2020	46.04	15.55	0.9903	2936830	168496	9932	2.15
hn2021	43.92	14.8	0.9979	2929927	163625	9094	2.15
hn2022	44.73	15.1	0.9977	2943746	168004	9870	2.15
hn2023	49.81	16.81	0.998	2950427	173626	14528	2.15
hn2024	45.4	15.34	0.9976	2930000	166808	9455	2.15
hn2025	33.94	11.5	0.9972	2921986	150601	7861	2.15
hn2026	31.41	10.66	0.99	2928177	146496	9028	2.15
hn2027	43.13	14.59	0.9904	2932167	162831	9429	2.15
hn2028	38.07	12.86	0.9973	2942106	158089	9316	2.15
hn2029	32.93	11.15	0.9972	2906034	147668	8774	2.15
hn2030	34.25	11.62	0.9902	2914151	150482	8414	2.15
hn2031	48.92	16.47	0.9976	2935555	165140	9876	2.15
hn2032	47.01	15.82	0.998	2942832	166722	9820	2.15
hn2033	40.55	13.72	0.9906	2952625	163643	9585	2.15
[truncated: 2,482 more rows]

## Sheet: Table 3
Supplementary Table 3. Statistics of variants in 4,480 individuals
	MAF <0.5%	0.5%≤MAF≤5%	MAF >5%
Variants type
SNVs	66281114	2766031	5071046
Novel SNVs (not in dbSNP151)	29013665	1518	236
Novel SNVs (not in 1000G)	55455951	243662	121202
Indels	6177123	832944	370737
Novel INDELs (not in dbSNP151)	2345163	8184	379
Novel INDELs (not in 1000G)	5506283	631725	106124
Location
Exon	1158724	38332	54720
Intron	32377367	1616695	2323389
Splice-site	98264	4462	5564
UTR	1041464	47391	61493
Upstream	508527	23373	33849
Downsteam	499095	25464	35601
Intergenic	36774796	1843258	2927167
Function
Synonymous	307745	11172	17632
Missense	529851	13450	15372
Stoploss	658	21	16
Stopgain	13825	184	131
frameshift insertion	3687	96	48
frameshift deletion	8803	142	70
nonframeshift insertion	2503	132	53
nonframeshift deletion	6855	210	104
Disease-associated
SIFT:deleterious	249592	5142	3221
Polyphen2:probably damaging	321968	5542	2915
Polyphen2:possibly damaging	176566	3914	2760
MutationTaster:disease causing	314637	5380	567
ClinVar:Pathogenic	1273	19	14
ClinVar:Likely pathogenic	526	6	4
10bp from exon-intron boundary as splice variants

## Sheet: Table 4
Supplementary Table 4. Top 50 of phenotypes and number of variants of the allele frequency difference between WBBC and EUR in the NHGRI-EBI Catalog database
Phenotypes	Number of Variants
Body Height	915
Body Mass Index	671
Blood Protein Levels	602
Bone Mineral Density	537
Educational Attainment	525
Waist-hip Ratio	437
Mean Corpuscular Hemoglobin Concentration	408
Type II Diabetes Mellitus	380
Waist Circumference	365
Adolescent Idiopathic Scoliosis	360
Cognitive Ability	353
Mathematical Ability	336
Red Blood Cell Count	335
Systolic Blood Pressure	322
Schizophrenia	301
Alzheimer's Disease	295
Post Bronchodilator FEV/FEC Ratio	294
Lung Function	281
Eosinophil Counts	278
Asthma	273
Post Bronchodilator FEV1	273
Smoking Behavior	272
Gut Microbiota	265
Mean Corpuscular Volume	260
Red Cell Distribution Width	259
Male-pattern Baldness	256
High Density Lipoprotein Cholesterol Levels	242
Platelet Count	237
Triglyceride Levels	235
Low Density Lipoprotein Cholesterol Levels	231
Breast Cancer	223
Hemoglobin Levels	223
Reticulocyte Count	220
Neuroticism	212
Monocyte Count	203
Coronary Artery Disease	201
Mean Platelet Volume	198
Diastolic Blood Pressure	188
Intelligence	184
Leukocyte Count	184
Hair Color	177
Depression	172
Hematocrit	162
Lymphocyte Counts	154
Cognitive Performance	154
C-reactive Protein Levels	148
Sex Hormone-binding Globulin Levels	148
Dna Methylation	146
Neutrophil Count	145
Smoking Status Measurement	142

## Sheet: Table 5
Supplementary Table 5. Comparison of the difference of variants allele frequency between WBBC and 1000 Genome Project population
The shared rare variants in the WBBC (12,166,698)
	EAS	SAS	AMR	EUR	AFR
rare	11,556,634(94.99%)	10,352,619(85.09%)	10,282,449(84.51%)	10,314,265(84.77%)	10,525,766(86.51%)
low-frequency	608,234(5%)	1,393,982(11.46%)	1,415,701(11.64%)	1,238,452(10.18%)	903,261(7.42%)
common	1,830(0.02)	420,097(3.45)	468,548(3.85%)	613,981(5.05%)	737,671(6.06%)
The shared low-frequency variants in the WBBC (2,604,451)
	EAS	SAS	AMR	EUR	AFR
rare	334,858(12.86%)	1,637,774(62.88%)	1,598,951(61.39%)	1,762,361(67.67%)	1,744,173(66.97%)
low-frequency	2,173,037(83.44%)	409,497(15.72%)	476,300(18.29%)	346,297(13.3%)	275,224(10.57%)
common	96,556(3.71%)	557,180(21.39%)	529,200(20.32%)	495,793(19.04%)	585,054(22.46%)
The shared common variants in the WBBC (5,007,552)
	EAS	SAS	AMR	EUR	AFR
rare	274(0.01%)	137,658(2.75%)	161,678(3.23%)	290,003(5.79%)	342,004(6.83%)
low-frequency	84,000(1.68%)	384,057(7.67%)	398,816(7.96%)	496,470(9.91%)	531,629(10.62%)
common	4,923,278(98.32%)	4,485,837(89.58%)	4,447,058(88.81%)	4,221,079(84.29%)	4,133,919(82.55%)

## Sheet: Table 6
Supplementary Table 6. Comparison of the difference of variants allele frequency between WBBC and East Asian population
The shared rare variants in the WBBC (596,746)
	MNG	KOR	JPT	KHV
rare	463,467(77.67%)	500,582(83.89%)	502,053(84.13%)	449,431(75.31%)
low-frequency	124,230(20.82%)	96,035(16.09%)	91,323(15.3%)	147,196(24.67%)
common	9,049(1.52%)	129(0.02%)	3,370(0.56%)	119(0.02%)
The shared low-frequency variants in the WBBC (472,836)
	MNG	KOR	JPT	KHV
rare	173,360(36.66%)	98,704(20.87%)	197,454(41.76%)	86,904(18.38%)
low-frequency	230,074(48.66%)	344,940(72.95%)	232,312(49.13%)	343,714(72.69%)
common	69,402(14.68%)	29,192(6.17%)	43,070(9.11%)	42,218(8.93%)
The shared common variants in the WBBC (950,938)
	MNG	KOR	JPT	KHV
rare	514(0.05%)	188(0.02%)	928(0.1%)	72(0.01%)
low-frequency	53,970(5.68%)	29,330(3.08%)	47,752(5.02%)	32,414(3.41%)
common	896,454(94.27%)	921,420(96.9%)	902,258(94.88%)	918,452(96.58%)

## Sheet: Table 7
Supplementary Table 7. Average number of autosomal variants in each genome of four regions
	Han Chinese		North		Central		South		Lingnan
	(n = 1151,		(n = 213,		(n = 42,		(n = 845,		(n = 51,
	Depth = 16.65X)		Depth = 16.56X)		Depth = 16.67X)		Depth = 16.66X)		Depth = 16.89X)
Annotation	No.	Het/Hom	No.	Het/Hom	No.	Het/Hom	No.	Het/Hom	No.	Het/Hom
Type
SNVs	2936012	1.27	2942027	1.28	2935356	1.26	2934641	1.26	2934137	1.26
Novel SNVs (not in dbSNP151)	7855	346.65	8876	422.91	8544	392.03	7602	326.45	7212	361.04
Novel SNVs (not in 1000G)	222462	1.52	223170	1.54	222604	1.52	222298	1.51	222107	1.51
INDELs	191333	2.87	191636	2.86	191214	2.84	191212	2.87	192163	2.87
Novel INDELs (not in dbSNP151)	1453	82.6	1497	85.05	1486	85.07	1440	81.79	1452	83.74
Novel INDELs (not in 1000G)	79853	5.93	79342	5.86	79593	5.87	79953	5.95	80556	5.96
Location
Exon	31419	1.36	31480	1.38	31401	1.36	31408	1.36	31356	1.35
Intron	1335361	1.34	1337888	1.35	1334826	1.34	1334788	1.34	1334732	1.33
Splice-site	3221	1.44	3223	1.46	3212	1.43	3220	1.44	3219	1.44
UTR	35272	1.36	35355	1.38	35327	1.36	35247	1.35	35281	1.36
Upstream	19367	1.3	19412	1.32	19382	1.31	19356	1.3	19353	1.29
Downsteam	20326	1.37	20382	1.39	20369	1.37	20309	1.36	20330	1.36
Intergenic	1682380	1.31	1685921	1.33	1682052	1.31	1681525	1.31	1682029	1.3
Function
Synonymous	10209	1.34	10214	1.36	10182	1.34	10211	1.34	10184	1.34
Missense	8915	1.36	8938	1.38	8918	1.36	8910	1.35	8911	1.36
Stoploss	10	1.49	10	1.5	10	1.53	10	1.49	10	1.43
Stopgain	70	2.46	70	2.48	67	2.24	70	2.46	70	2.45
Frameshift insertion	24	2.22	25	2.24	25	2.3	24	2.21	24	2.21
Frameshift deletion	33	4.9	33	5.01	33	6.08	33	4.85	32	4.51
Non-frameshift insertion	25	1.88	26	1.92	26	2.01	25	1.87	26	1.87
Non-frameshift deletion	44	4.56	45	4.74	44	5.2	43	4.46	43	4.91
Disease-associated
SIFT:deleterious	1623	2.86	1625	2.9	1627	2.82	1623	2.85	1622	2.85
Polyphen2:probably damaging	956	3.32	958	3.38	958	3.25	955	3.31	951	3.22
Polyphen2:possibly damaging	758	2.92	761	2.96	758	2.88	757	2.92	756	2.91
MutationTaster:disease causing	8591	1.24	8617	1.26	8593	1.24	8585	1.24	8575	1.24
ClinVar:Pathogenic	11	1.9	11	1.75	11	2.58	11	1.9	11	2.08
10bp from exon-intron boundary as splice variants

## Sheet: Table 8
Supplementary Table 8. The pathogenic and likely pathogenic variants were recorded by Clinvar in the 1,151 healthy individuals
CHROM	POS_GRCh37	POS_GRCh38	ID	REF	ALT	Gene	NM	Exon	cDNA	Protein	Function	WBBC_AF	1KG_AF	gnomAD_AF	north(AC/AN)	central(AC/AN)	south(AC/AN)	lingnan(AC/AN)	SIFT	Polyphen2_HDIV	Polyphen2_HVAR	MutationTaster	Clinvar	Disease
chr1	1470999	1535619	rs1045410944	C	T	TMEM240	NM_001114748.1	exon3	c.343G>A	p.V115M	missense	0.000445534	0	0	1/426	.	1/4290	.	D	D	P	D	Pathogenic	Spinocerebellar_ataxia_21
chr1	2338019	2406580	rs61752093	CAG	C	PEX10	NM_153818.1	exon5	c.874_875del	p.L292Vfs*66	frameshift deletion	0.000445534	0.000196232	0	.	.	1/4290	.	.	.	.	.	Pathogenic	Peroxisome_biogenesis_disorders,_Zellweger_syndrome_spectrum|Peroxisome_biogenesis_disorder,_complementation_group_7|Peroxisome_biogenesis_disorder_6A|Peroxisome_biogenesis_disorder_6B|not_provided
chr1	5934602	5874542	rs373369949	G	A	NPHP4	NM_015102.4	exon22	c.3160C>T	p.R1054C	missense	0.0013366	0.00117739	0.0003	.	.	5/4290	.	D	D	D	D	Likely_pathogenic	not_provided
chr1	6528438	6468378	rs202191898	C	G	PLEKHG5	NM_001265592.1	exon21	c.2695G>C	p.G899R	missense	0.000111383	0	0	.	1/84	.	.	D	D	D	D	Pathogenic	Charcot-Marie-Tooth_disease,_recessive_intermediate_c
chr1	16375583	16049088	rs751608665	GA	G	CLCNKB	NM_001165945.2	exon1	c.118delA	p.R40Gfs*4	frameshift deletion	0.00211628	0	0	1/426	.	14/4290	.	.	.	.	.	Pathogenic	Bartter_syndrome_type_3
chr1	17708541	17382046	rs775156958	T	A	PADI6	NM_207421.4	exon6	c.633T>A	p.H211Q	missense	0.000111383	0.000196232	3.18e-05	.	.	1/4290	.	.	B	B	.	Pathogenic	Preimplantation_embryonic_lethality_2
chr1	20972133	20645640	rs28940285	T	C	PINK1	NM_032409.2	exon5	c.1040T>C	p.L347P	missense	0.00033415	0	3.19e-05	.	.	1/4290	.	D	D	D	A	Pathogenic	Parkinson_disease_6,_autosomal_recessive_early-onset
chr1	20975710	20649217	rs34208370	C	T	PINK1	NM_032409.2	exon7	c.1474C>T	p.R492X	stopgain	0.000556917	0	0	.	.	3/4290	1/102	.	.	.	D	Pathogenic	Parkinson_disease_6,_autosomal_recessive_early-onset|not_provided
chr1	24669202	24342712	rs770938921	C	T	GRHL3	NM_198174.2	exon10	c.1225C>T	p.R409C	missense	0.000111383	0	9.56e-05	1/426	.	.	.	D	D	D	D	Likely_pathogenic	Van_der_Woude_syndrome
chr1	27240265	26913774	rs540387719	CAGGTGCGATG	C	NR0B2	NM_021969.2	exon1	c.157_166del	p.H53Afs*50	frameshift deletion	0.00111383	0	0	.	.	7/4290	.	.	.	.	.	Likely_pathogenic	APC-mutation_negative_familial_colorectal_cancer
chr1	27240332	26913841	rs74315349	G	A	NR0B2	NM_021969.2	exon1	c.100C>T	p.R34X	stopgain	0.0006683	0	6.37e-05	.	.	4/4290	.	.	.	.	A	Pathogenic	Obesity,_mild,_early-onset
chr1	35250860	34785259	rs121908851	A	G	GJB3	NM_024009.2	exon2	c.497A>G	p.N166S	missense	0.00033415	0	3.19e-05	.	.	2/4290	.	T	B	B	A	Pathogenic	Deafness,_digenic,_GJB2/GJB3
chr1	40756542	40290870	rs137854889	G	GT	ZMPSTE24	NM_005857.4	exon9	c.1077dupT	p.L362Ffs*19	frameshift insertion	0.000556917	0	6.37e-05	2/426	.	3/4290	.	.	.	.	.	Pathogenic	Lethal_tight_skin_contracture_syndrome|Mandibuloacral_dysplasia_with_type_B_lipodystrophy|ZMPSTE24-Related_Disorders|not_provided
chr1	41284190	40818518	rs80358273	C	G	KCNQ4	NM_004700.3	exon4	c.546C>G	p.F182L	missense	0.00545779	0	0	5/426	.	26/4290	1/102	T	B	B	A	Pathogenic	DFNA_2_Nonsyndromic_Hearing_Loss
chr1	43803817	43338146	rs148434485	C	T	MPL	NM_005373.2	exon2	c.127C>T	p.R43X	stopgain	0.000111383	0	0.0004	.	.	1/4290	.	.	.	.	A	Pathogenic	MPL-Related_Disorders|Congenital_amegakaryocytic_thrombocytopenia
chr1	45407181	44941509	rs748937918	CT	C	EIF2B3	NM_020365.4	exon4	c.450delA	p.A151Qfs*57	frameshift deletion	0.000222767	0	0.0087	.	.	2/4290	.	.	.	.	.	Likely_pathogenic	not_provided
chr1	45797972	45332300	rs786203115	G	A	MUTYH	NM_001128425.1	exon10	c.799C>T	p.Q267X	stopgain	0.00033415	0	3.19e-05	1/426	.	1/4290	.	.	.	.	A	Pathogenic	Hereditary_cancer-predisposing_syndrome|MYH-associated_polyposis
chr1	45798117	45332445	rs140342925	C	T	MUTYH	NM_001128425.1	exon9	c.734G>A	p.R245H	missense	0.000111383	0	6.37e-05	.	.	1/4290	.	D	D	D	D	Pathogenic/Likely_pathogenic	Neoplasm_of_stomach|Pilomatrixoma|Hereditary_cancer-predisposing_syndrome|MYH-associated_polyposis|MUTYH-associated_polyposis|not_provided
chr1	45798130	45332458	rs34126013	G	A	MUTYH	NM_001128425.1	exon9	c.721C>T	p.R241W	missense	0.000222767	0	0	.	.	1/4290	.	D	D	D	D	Pathogenic/Likely_pathogenic	Hereditary_cancer-predisposing_syndrome|MYH-associated_polyposis|not_provided
chr1	45798627	45332955	rs762307622	C	T	MUTYH	NM_001128425.1	exon6	c.467G>A	p.W156X	stopgain	0.0006683	0.000196232	0.0001	.	.	4/4290	.	.	.	.	A	Pathogenic/Likely_pathogenic	Hereditary_cancer-predisposing_syndrome|MYH-associated_polyposis|not_provided
chr1	45808796	45343124	rs750266350	C	T	TOE1	NM_025077.3	exon8	c.955C>T	p.H319Y	missense	0.000779684	0.000196232	9.56e-05	.	.	4/4290	.	D	D	D	D	Likely_pathogenic	Pontocerebellar_hypoplasia,_type_7
chr1	45966084	45500412	rs546099787	A	G	MMACHC	NM_015506.2	exon1	c.80A>G	p.Q27R	missense	0.00033415	0	0	.	.	2/4290	.	T	B	B	D	Pathogenic	Methylmalonic_acidemia_with_homocystinuria
chr1	45974647	45508975	rs587776889	G	A	MMACHC	NM_015506.2	exon4	c.609G>A	p.W203X	stopgain	0.000779684	0	0	1/426	.	5/4290	.	.	.	.	D	Pathogenic	Methylmalonic_acidemia_with_homocystinuria|not_provided
chr1	45974693	45509021	rs398124296	CAGA	C	MMACHC	NM_015506.2	exon4	c.656_658del	p.K220del	nonframeshift deletion	0.000891067	0	0	4/426	.	3/4290	.	.	.	.	.	Pathogenic	Methylmalonic_acidemia_with_homocystinuria|not_provided
chr1	46657846	46192174	rs766382416	C	T	POMGNT1	NM_001243766.1	exon17	c.1463G>A	p.R488Q	missense	0.000111383	0.000196232	0	.	.	1/4290	.	D	D	D	D	Likely_pathogenic	Muscle_eye_brain_disease|Congenital_muscular_dystrophy-dystroglycanopathy_with_mental_retardation,_type_B3|Limb-girdle_muscular_dystrophy-dystroglycanopathy,_type_C3|Retinitis_pigmentosa_76|not_provided
chr1	46976625	46510953	rs730882203	C	T	DMBX1	NM_147192.2	exon3	c.367C>T	p.R123W	missense	0.000111383	0.000196232	6.37e-05	1/426	.	.	.	D	D	D	D	Likely_pathogenic	Hearing_impairment|Strabismus|Hypermetropia|Seizures|Muscular_hypotonia|Global_developmental_delay
chr1	53676333	53210661	.	C	CT	CPT2	NM_000098.2	exon4	c.988dupT	p.I332Hfs*2	frameshift insertion	0.000111383	0	6.37e-05	.	.	.	1/102	.	.	.	.	Likely_pathogenic	Carnitine_palmitoyltransferase_II_deficiency,_infantile
chr1	74716455	74250771	rs762721434	T	C	FPGT-TNNI3K	NM_001112808.2	intron6	c.675+2T>C		splicing	0.000111383	0	0	.	.	1/4290	.	.	.	.	D	Pathogenic	Cardiac_conduction_disease_with_or_without_dilated_cardiomyopathy
chr1	76200533	75734848	rs786204642	ATGAC	A	ACADM	NM_001286043.1	exon7	c.545_548del	p.T183Rfs*4	frameshift deletion	0.0006683	0	0	1/426	.	1/4290	.	.	.	.	.	Pathogenic	Medium-chain_acyl-coenzyme_A_dehydrogenase_deficiency|not_provided
chr1	76211508	75745823	rs200724875	G	A	ACADM	NM_001286043.1	exon9	c.716G>A	p.R239H	missense	0.000222767	0	3.19e-05	.	.	1/4290	.	D	D	P	D	Pathogenic/Likely_pathogenic	Medium-chain_acyl-coenzyme_A_dehydrogenase_deficiency|not_provided
chr1	76215103	75749418	rs1057516644	G	A	ACADM	NM_001286043.1	intron9	c.808-1G>A		splicing	0.000111383	0.00451334	0.0109	.	.	1/4290	.	.	.	.	D	Likely_pathogenic	Medium-chain_acyl-coenzyme_A_dehydrogenase_deficiency
chr1	91404897	90939340	rs387907109	T	C	ZNF644	NM_201269.2	exon3	c.2014A>G	p.S672G	missense	0.00033415	0.000392465	0.0002	1/426	.	1/4290	.	D	P	B	D	Pathogenic	Myopia_21,_autosomal_dominant
chr1	92479770	92014213	rs754258809	G	A	BRDT	NM_001242806.2	exon19	c.2795G>A	p.G932D	missense	0.00033415	0.000392465	6.37e-05	.	.	1/4290	.	D	D	P	D	Pathogenic	SPERMATOGENIC_FAILURE_21
chr1	94463583	93998027	rs61750658	A	G	ABCA4	NM_000350.2	exon48	c.6563T>C	p.F2188S	missense	0.000556917	0.000196232	3.19e-05	.	.	5/4290	.	D	P	B	D	Pathogenic	Stargardt_disease|not_provided
chr1	94471025	94005469	rs148460146	C	T	ABCA4	NM_000350.2	exon44	c.6119G>A	p.R2040Q	missense	0.00256182	0	0	2/426	.	8/4290	.	D	D	D	D	Likely_pathogenic	Stargardt_disease_1|not_provided
chr1	94476424	94010868	rs752160946	C	T	ABCA4	NM_000350.2	exon40	c.5646G>A	p.M1882I	missense	0.000111383	0	0	.	.	1/4290	.	D	P	B	D	Likely_pathogenic	not_provided
chr1	94495002	94029446	rs281865377	T	TG	ABCA4	NM_000350.2	exon30	c.4537dupC	p.Q1513Pfs*42	frameshift insertion	0.000111383	0	3.19e-05	.	.	1/4290	.	.	.	.	.	Pathogenic	Cone-rod_degeneration|Retinitis_pigmentosa|Macular_dystrophy|Stargardt_disease_1|Cone-rod_dystrophy_3|Retinitis_pigmentosa_19|not_provided
chr1	94508976	94043420	rs61750061	C	T	ABCA4	NM_000350.2	exon21	c.3106G>A	p.E1036K	missense	0.000222767	0	6.37e-05	1/426	.	.	1/102	T	B	B	A	Pathogenic	Stargardt_disease_1|not_provided
chr1	94528132	94062576	rs61752401	C	T	ABCA4	NM_000350.2	intron13	c.1937+1G>A		splicing	0.000111383	0	0	1/426	.	.	.	.	.	.	D	Pathogenic	Stargardt_disease_1|not_provided
chr1	94546253	94080697	rs794727903	G	A	ABCA4	NM_000350.2	exon8	c.C880T	p.Q294X	stopgain	0.000222767	0	0	.	.	2/4290	.	.	.	.	A	Pathogenic	not_provided
chr1	94564355	94098799	rs62645952	G	A	ABCA4	NM_000350.2	exon6	c.763C>T	p.R255C	missense	0.00111383	0	0	.	.	8/4290	.	D	D	P	D	Pathogenic	Cone-rod_dystrophy_3
chr1	100353565	99888009	.	AATCAG	A	AGL	NM_000028.2	exon21	c.2714_2718del	p.Q906Pfs*5	frameshift deletion	0.000111383	0	0	.	.	1/4290	.	.	.	.	.	Pathogenic	Glycogen_storage_disease_type_III
chr1	109801573	109258951	rs561330579	C	T	CELSR2	NM_001408.2	exon2	c.3830C>T	p.P1277L	missense	0.00111383	0	0.0001	.	.	4/4290	.	D	D	P	D	Likely_pathogenic	Intellectual_disability|Global_developmental_delay
chr1	116283388	115740767	rs775663612	G	A	CASQ2	NM_001232.3	exon3	c.381C>T	p.G127G	synonymous	0.000111383	0	0.0001	.	.	1/4290	.	.	.	.	.	Likely_pathogenic	Ventricular_tachycardia,_catecholaminergic_polymorphic,_2
chr1	120298049	119755426	rs764706394	C	G	HMGCS2	NM_005518.3	intron6	c.1187+1G>C		splicing	0.000779684	0	0	.	.	5/4290	.	.	.	.	D	Likely_pathogenic	mitochondrial_3-hydroxy-3-methylglutaryl-CoA_synthase_deficiency
chr1	150529772	150557296	rs368482584	C	T	ADAMTSL4	NM_001288608.1	exon13	c.2077C>T	p.R693X	stopgain	0.000111383	0	0	.	.	1/4290	.	.	.	.	A	Pathogenic	Ectopia_lentis,_isolated_autosomal_recessive
chr1	150991126	151018650	rs773618224	G	A	PRUNE1	NM_021222.3	exon3	c.316G>A	p.D106N	missense	0.000111383	0	0	1/426	.	.	.	D	D	D	D	Pathogenic/Likely_pathogenic	Abnormality_of_brain_morphology|Neurodevelopmental_disorder_with_microcephaly,_hypotonia,_and_variable_brain_anomalies
chr1	151262329	151289853	rs148402804	C	G	ZNF687	NM_001304763.1	exon7	c.2810C>G	p.P937R	missense	0.00122522	0	0	.	.	6/4290	.	D	B	B	D	Pathogenic	Paget_disease_of_bone_6
chr1	152275727	152303251	rs546871592	G	A	FLG	NM_002016.1	exon3	c.11635C>T	p.R3879X	stopgain	0.000111383	0	0	.	.	1/4290	.	.	.	.	D	Likely_pathogenic	not_provided
chr1	152280023	152307547	rs138726443	G	A	FLG	NM_002016.1	exon3	c.7339C>T	p.R2447X	stopgain	0.000111383	0.000784929	9.56e-05	.	.	1/4290	.	.	.	.	D	Pathogenic	Ichthyosis_vulgaris|Dermatitis,_atopic,_2|not_provided
chr1	152280098	152307622	rs374588791	C	A	FLG	NM_002016.1	exon3	c.7264G>T	p.E2422X	stopgain	0.00289597	0	6.38e-05	1/426	.	11/4290	2/102	.	.	.	D	Pathogenic	not_provided
chr1	152280113	152307637	rs528722713	G	A	FLG	NM_002016.1	exon3	c.7249C>T	p.Q2417X	stopgain	0.0020049	0	0	.	.	11/4290	.	.	.	.	D	Pathogenic	not_provided
chr1	152280404	152307928	rs578184315	CATGGGATG	C	FLG	NM_002016.1	exon3	c.6950_6957del	p.S2317*	stopgain	0.00423257	0	3.19e-05	.	.	17/4290	1/102	.	.	.	.	Pathogenic	not_provided
chr1	152281521	152309045	rs748135905	C	T	FLG	NM_002016.1	exon3	c.5841G>A	p.W1947X	stopgain	0.0006683	0	0	1/426	.	3/4290	.	.	.	.	D	Pathogenic	not_provided
chr1	152283457	152310981	rs754812742	G	T	FLG	NM_002016.1	exon3	c.3905C>A	p.S1302X	stopgain	0.00100245	0	3.19e-05	.	1/84	2/4290	.	.	.	.	D	Pathogenic	Ichthyosis_vulgaris|not_provided
chr1	152284040	152311564	rs200519781	CT	C	FLG	NM_002016.1	exon3	c.3321delA	p.G1109Efs*13	frameshift deletion	0.0130319	0	0	6/426	2/84	48/4290	1/102	.	.	.	.	Pathogenic	Ichthyosis_vulgaris|Dermatitis,_atopic,_2,_susceptibility_to|not_provided
chr1	152284136	152311660	rs745915174	CCTCA	C	FLG	NM_002016.1	exon3	c.3222_3225del	p.S1074Rfs*47	frameshift deletion	0.00111383	0	9.56e-05	1/426	.	5/4290	.	.	.	.	.	Pathogenic	not_provided
chr1	152286113	152313637	rs763225328	A	AC	FLG	NM_002016.1	exon3	c.1248dupG	p.S417Vfs*2	frameshift insertion	0.00155937	0	0	.	.	7/4290	.	.	.	.	.	Pathogenic	not_provided
chr1	154246356	154273880	rs770288337	T	TG	HAX1	NM_006118.3	exon3	c.424dupG	p.V144Gfs*5	frameshift insertion	0.000556917	0	3.19e-05	.	1/84	1/4290	.	.	.	.	.	Pathogenic	Severe_congenital_neutropenia_3,_autosomal_recessive
chr1	155207370	155237579	.	C	G	GBA	NM_001005741.2	intron8	c.762-1G>C		splicing	0.000222767	0.000196232	0	.	.	1/4290	.	.	.	.	D	Pathogenic	Gaucher_disease|Parkinson_disease,_late-onset
chr1	155207965	155238174	rs409652	C	T	GBA	NM_001005741.2	exon7	c.721G>A	p.G241R	missense	0.000445534	0	0	.	.	.	1/102	T	P	B	D	Pathogenic	Gaucher_disease|Acute_neuronopathic_Gaucher's_disease|Subacute_neuronopathic_Gaucher's_disease|Gaucher_disease_type_3C|Gaucher's_disease,_type_1|not_provided
chr1	156108325	156138534	rs57830985	G	A	LMNA	NM_170707.3	exon11	c.1745G>A	p.R582H	missense	0.000111383	0	0	.	.	1/4290	.	D	D	D	A	Pathogenic	Familial_partial_lipodystrophy_2|not_provided
chr1	156851346	156881554	rs756981419	C	T	NTRK1	NM_002529.3	exon17	c.2303C>T	p.P768L	missense	0.000222767	0	0	1/426	.	1/4290	.	D	D	D	D	Pathogenic	Charcot-Marie-Tooth_disease|Hereditary_insensitivity_to_pain_with_anhidrosis
chr1	159175494	159205704	rs34599082	C	T	ACKR1	NM_001122951.2	exon2	c.271C>T	p.R91C	missense	0.00122522	0	6.37e-05	.	.	3/4290	.	T	D	P	A	Pathogenic	DUFFY_BLOOD_GROUP_SYSTEM,_FY(bwk)_PHENOTYPE
chr1	168074093	168104855	rs200635937	A	T	GPR161	NM_001267609.1	exon3	c.56T>A	p.L19Q	missense	0.000111383	0	9.56e-05	.	.	.	1/102	D	D	P	D	Likely_pathogenic	Pituitary_stalk_interruption_syndrome|not_provided
chr1	169446685	169477447	rs28937595	C	T	SLC19A2	NM_006996.2	exon2	c.515G>A	p.G172D	missense	0.000111383	0.000588697	9.56e-05	1/426	.	.	.	D	D	D	A	Pathogenic	Megaloblastic_anemia,_thiamine-responsive,_with_diabetes_mellitus_and_sensorineural_deafness|not_provided
chr1	169487691	169518453	rs118203910	G	A	F5	NM_000130.4	exon23	c.6304C>T	p.R2102C	missense	0.00033415	0	0	.	.	1/4290	.	D	D	D	A	Likely_pathogenic	Factor_V_deficiency
chr1	169524538	169555300	rs118203905	T	C	F5	NM_000130.4	exon7	c.1000A>G	p.R334G	missense	0.00579194	0	0	.	1/84	24/4290	.	D	D	P	A	Pathogenic	Factor_V_Hong_Kong
chr1	171077323	171108182	rs3832024	CTG	C	FMO3	NM_001002294.2	exon5	c.589_590del	p.C197*	stopgain	0.00300735	0	0	2/426	1/84	11/4290	.	.	.	.	.	Pathogenic	Trimethylaminuria
chr1	171083479	171114339	rs72549331	G	A	FMO3	NM_001002294.2	exon7	c.1160G>A	p.R387H	missense	0.00100245	0.0243328	0.0479	1/426	.	5/4290	.	D	P	B	D	Likely_pathogenic	not_provided
chr1	171086457	171117317	rs72549334	C	T	FMO3	NM_001002294.2	exon9	c.1474C>T	p.R492W	missense	0.000222767	0	0	.	.	1/4290	1/102	D	D	D	A	Likely_pathogenic	Trimethylaminuria
chr1	173880989	173911851	.	T	C	SERPINC1	NM_000488.3	exon3	c.572A>G	p.Q191R	missense	0.0006683	0	0.0001	.	.	2/4290	.	D	D	D	D	Likely_pathogenic	not_provided
chr1	179521740	179552605	rs74315348	G	A	NPHS2	NM_014625.3	exon7	c.871C>T	p.R291W	missense	0.000556917	0	0	.	.	4/4290	.	D	D	D	A	Pathogenic/Likely_pathogenic	Nephrotic_syndrome,_idiopathic,_steroid-resistant|not_provided
chr1	183184602	183215467	rs80356683	C	T	LAMC2	NM_005562.2	exon3	c.283C>T	p.R95X	stopgain	0.000111383	0	6.38e-05	1/426	.	.	.	.	.	.	A	Pathogenic	Junctional_epidermolysis_bullosa_gravis_of_Herlitz
chr1	183546796	183577661	rs374402066	G	A	NCF2	NM_000433.3	exon3	c.304C>T	p.R102X	stopgain	0.000222767	0	0	.	.	2/4290	.	.	.	.	A	Pathogenic	Chronic_granulomatous_disease,_autosomal_recessive_cytochrome_b-positive,_type_2
chr1	197062385	197093255	rs587783287	G	A	ASPM	NM_018136.4	exon21	c.9091C>T	p.R3031X	stopgain	0.000111383	0	0.0004	.	.	1/4290	.	.	.	.	A	Pathogenic	Primary_autosomal_recessive_microcephaly_5
chr1	197297735	197328605	.	G	A	CRB1	NM_201253.2	exon2	c.254G>A	p.C85Y	missense	0.000111383	0	0	.	.	1/4290	.	D	D	D	D	Likely_pathogenic	Retinal_dystrophy
chr1	197297936	197328806	.	G	A	CRB1	NM_201253.2	exon2	c.455G>A	p.C152Y	missense	0.000111383	0	0	.	.	1/4290	.	D	D	D	D	Likely_pathogenic	Leber_congenital_amaurosis
chr1	197411423	197442293	rs890453675	G	A	CRB1	NM_201253.2	intron11	c.4005+1G>A		splicing	0.000111383	0	0	.	.	1/4290	.	.	.	.	D	Pathogenic	Leber_congenital_amaurosis
chr1	214818825	214645482	rs757531591	C	CA	CENPF	NM_016343.3	exon13	c.5913dupA	p.T1974Nfs*9	frameshift insertion	0.000222767	0	3.19e-05	.	.	1/4290	.	.	.	.	.	Pathogenic	Stromme_syndrome
chr1	216051224	215877882	rs397518039	T	C	USH2A	NM_206933.2	intron42	c.8559-2A>G		splicing	0.000779684	0	9.57e-05	.	.	4/4290	.	.	.	.	D	Pathogenic	Retinitis_pigmentosa|Usher_syndrome|Usher_syndrome,_type_2A|Retinitis_pigmentosa_39|not_provided|Rare_genetic_deafness
chr1	216419934	216246592	rs201527662	A	C	USH2A	NM_206933.2	exon13	c.2802T>G	p.C934W	missense	0.00300735	0	0	.	1/84	11/4290	.	D	D	D	D	Pathogenic/Likely_pathogenic	Retinitis_pigmentosa|Usher_syndrome_type_2|Usher_syndrome,_type_2A|Retinitis_pigmentosa_39|not_provided
chr1	216462717	216289375	rs534534437	G	A	USH2A	NM_206933.2	exon11	c.1876C>T	p.R626X	stopgain	0.000111383	0	0	.	.	1/4290	.	.	.	.	A	Pathogenic	not_provided|Rare_genetic_deafness
chr1	216498882	216325540	rs371777049	C	T	USH2A	NM_206933.2	exon6	c.908G>A	p.R303H	missense	0.000111383	0	0	1/426	.	.	.	D	D	D	D	Pathogenic	Hearing_impairment|Retinitis_pigmentosa_39|not_provided
chr1	216595579	216422237	rs141672841	G	GA	USH2A	NM_206933.2	exon2	c.99_100insT	p.R34Sfs*41	frameshift insertion	0.00033415	0	0	1/426	.	1/4290	.	.	.	.	.	Pathogenic	Inborn_genetic_diseases
chr1	225591096	225403394	rs573510559	C	T	LBR	NM_002296.3	exon14	c.1757G>A	p.R586H	missense	0.000445534	0	0.0002	.	.	3/4290	.	D	D	D	D	Pathogenic	PELGER-HUET_ANOMALY_WITH_MILD_SKELETAL_ANOMALIES
chr1	235564859	235401544	rs758937799	AAG	A	TBCE	NM_001287801.1	exon3	c.143_144del	p.K48Tfs*2	frameshift deletion	0.00033415	0	0	1/426	.	1/4290	.	.	.	.	.	Likely_pathogenic	Kenny-Caffey_syndrome_type_1|Hypoparathyroidism_retardation_dysmorphism_syndrome
chr1	237015878	236852578	rs121913580	C	T	MTR	NM_000254.2	exon17	c.1753C>T	p.R585X	stopgain	0.000111383	0	3.19e-05	.	.	1/4290	.	.	.	.	A	Pathogenic	METHYLCOBALAMIN_DEFICIENCY,_cblG_TYPE
chr1	237494239	237330939	rs1060500142	C	T	RYR2	NM_001035.2	exon3	c.230C>T	p.A77V	missense	0.000111383	0	0.0001	.	.	1/4290	.	D	D	D	D	Pathogenic	Catecholaminergic_polymorphic_ventricular_tachycardia
chr1	237947538	237784238	rs794728828	G	A	RYR2	NM_001035.2	exon90	c.12526G>A	p.V4176M	missense	0.000111383	0	9.56e-05	.	.	1/4290	.	D	D	P	D	Likely_pathogenic	not_provided
chr1	240656738	240493438	rs373941682	G	A	GREM2	NM_022469.3	exon2	c.38C>T	p.A13V	missense	0.0020049	0	0	1/426	.	8/4290	1/102	T	B	B	D	Pathogenic	Tooth_agenesis,_selective,_9
chr10	15726034	15684035	rs748467820	G	T	ITGA8	NM_003638.2	exon4	c.537C>A	p.S179R	missense	0.000445534	0	0.0003	.	.	2/4290	.	T	D	D	D	Pathogenic	Renal_hypodysplasia/aplasia_1
chr10	17083159	17041160	rs121434430	G	A	CUBN	NM_001081.3	exon27	c.3890C>T	p.P1297L	missense	0.000111383	0	0	.	.	1/4290	.	D	D	D	A	Pathogenic/Likely_pathogenic	Megaloblastic_anemia_1,_Finnish_type|Megaloblastic_anemia_due_to_inborn_errors_of_metabolism
chr10	54531235	52771475	rs1800450	C	T	MBL2	NM_000242.2	exon1	c.161G>A	p.G54D	missense	0.166073	0	0	66/426	18/84	684/4290	11/102	D	D	D	P	Pathogenic	Mannose-binding_protein_deficiency
chr10	73122094	71362337	rs397515429	G	A	SLC29A3	NM_018344.5	exon6	c.1157G>A	p.R386Q	missense	0.000111383	0	3.22e-05	.	.	1/4290	.	D	D	D	D	Pathogenic	Histiocytosis-lymphadenopathy_plus_syndrome
chr10	73574856	71815099	rs372388344	G	A	CDH23	NM_022124.5	exon68	c.9886G>A	p.D3296N	missense	0.000222767	0.000588697	0.0004	1/426	.	.	.	D	D	D	D	Pathogenic	PITUITARY_ADENOMA_5,_MULTIPLE_TYPES
chr10	81930608	80170852	.	T	C	ANXA11	NM_001278408.1	exon5	c.119A>G	p.D40G	missense	0.000111383	0	0	1/426	.	.	.	T	D	P	D	Pathogenic	AMYOTROPHIC_LATERAL_SCLEROSIS_23
chr10	90697868	88938111	rs886038978	G	A	ACTA2	NM_001141945.1	exon8	c.940C>T	p.R314X	stopgain	0.000111383	0	0	.	.	1/4290	.	.	.	.	D	Pathogenic	Cardiovascular_phenotype
chr10	95262942	93503185	rs141458677	C	T	CEP55	NM_018131.4	exon3	c.256C>T	p.R86X	stopgain	0.000111383	0	0	.	.	1/4290	.	.	.	.	A	Pathogenic	Hydranencephaly_with_renal_aplasia-dysplasia
chr10	96826970	95067213	rs398088095	GT	G	CYP2C8	NM_000770.3	exon3	c.475delA	p.T159Pfs*19	frameshift deletion	0.00100245	0	0	.	.	5/4290	.	.	.	.	.	Pathogenic	DRUG_METABOLISM,_ALTERED,_CYP2C8-RELATED
chr10	97366676	95606919	rs762271422	G	C	ALDH18A1	NM_002860.3	exon18	c.2231C>G	p.S744W	missense	0.000111383	0	0.0001	1/426	.	.	.	D	D	P	D	Likely_pathogenic	Spastic_paraplegia_5A
chr10	99361682	97601925	rs267606764	T	G	HOGA1	NM_138413.3	exon6	c.769T>G	p.C257G	missense	0.000891067	0	0.0001	.	.	4/4290	.	T	D	D	N	Likely_pathogenic	Primary_hyperoxaluria,_type_III|not_provided
chr10	99361747	97601990	rs770050262	G	A	HOGA1	NM_138413.3	exon6	c.834G>A	p.A278A	synonymous	0.0006683	0	6.38e-05	.	.	4/4290	.	.	.	.	.	Pathogenic	Primary_hyperoxaluria,_type_III|not_provided
chr10	99361748	97601991	rs749315029	G	T	HOGA1	NM_138413.3	intron6	c.834+1G>T		splicing	0.00100245	0	0	.	.	2/4290	.	.	.	.	D	Likely_pathogenic	Primary_hyperoxaluria,_type_III
chr10	99371339	97611582	rs149150736	C	T	HOGA1	NM_138413.3	exon7	c.907C>T	p.R303C	missense	0.000111383	0	3.19e-05	1/426	.	.	.	D	D	D	D	Pathogenic	Primary_hyperoxaluria,_type_III
chr10	102546770	100787013	rs747453876	T	C	PAX2	NM_003990.3	intron6	c.685+2T>C		splicing	0.000111383	0.000392465	0.0002	.	.	.	1/102	.	.	.	D	Pathogenic	not_provided
chr10	102750661	100990904	rs753386843	G	A	TWNK	NM_021830.2	exon4	c.1628G>A	p.R543Q	missense	0.000111383	0.00156986	0.0004	.	.	1/4290	.	D	D	D	D	Likely_pathogenic	Mitochondrial_DNA_depletion_syndrome_7_(hepatocerebral_type)
chr10	103827269	102067512	.	C	T	HPS6	NM_024747.5	exon1	c.2038C>T	p.Q680X	stopgain	0.000111383	0	3.18e-05	.	.	1/4290	.	.	.	.	D	Pathogenic	Hermansky-Pudlak_syndrome_6
chr10	104590518	102830761	rs756135168	TGAAAGAGTC	T	CYP17A1	NM_000102.3	exon8	c.1459_1467del	p.D487_F489del	nonframeshift deletion	0.000222767	0	3.42e-05	.	.	1/4290	.	.	.	.	.	Pathogenic	Deficiency_of_steroid_17-alpha-monooxygenase|not_provided
chr10	124221527	122462011	.	G	A	HTRA1	NM_002775.4	exon1	c.359G>A	p.G120D	missense	0.000111383	0.000196232	6.42e-05	.	.	1/4290	.	D	D	D	D	Likely_pathogenic	Cerebral_arteriopathy,_autosomal_dominant,_with_subcortical_infarcts_and_leukoencephalopathy,_type_2
chr10	124812613	123053097	rs201877440	A	G	ACADSB	NM_001609.3	exon10	c.1165A>G	p.M389V	missense	0.00367565	0	0	.	.	8/4290	.	T	P	P	D	Pathogenic	Deficiency_of_2-methylbutyryl-CoA_dehydrogenase
chr11	2187990	2166760	.	C	T	TH	NM_199292.2	exon9	c.943G>A	p.G315S	missense	0.000222767	0	0	.	.	1/4290	.	D	D	D	D	Likely_pathogenic	Segawa_syndrome,_autosomal_recessive
chr11	2189135	2167905	rs80338892	C	T	TH	NM_199292.2	exon6	c.698G>A	p.R233H	missense	0.000222767	0	0	.	.	1/4290	.	D	D	D	A	Pathogenic	Dystonia|Segawa_syndrome,_autosomal_recessive|not_provided
chr11	2189139	2167909	rs1057517423	G	A	TH	NM_199292.2	exon6	c.694C>T	p.Q232X	stopgain	0.000222767	0	3.19e-05	.	.	1/4290	.	.	.	.	A	Pathogenic	Segawa_syndrome,_autosomal_recessive
chr11	2189844	2168614	rs771610752	G	A	TH	NM_199292.2	exon4	c.457C>T	p.R153X	stopgain	0.000222767	0	0	.	.	1/4290	.	.	.	.	A	Pathogenic	Dystonia|Segawa_syndrome,_autosomal_recessive|not_provided
chr11	2549253	2528023	rs397508111	G	A	KCNQ1	NM_000218.2	intron2	c.477+5G>A		splicing	0.000111383	0	0	.	1/84	.	.	.	.	.	.	Pathogenic	Long_QT_syndrome|Romano-Ward_syndrome|Long_QT_syndrome_1|not_specified|not_provided
chr11	2797286	2776056	.	T	C	KCNQ1	NM_000218.2	intron13	c.1685+2T>C		splicing	0.000111383	0	3.19e-05	1/426	.	.	.	.	.	.	D	Pathogenic	Long_QT_syndrome_1
chr11	2930440	2909210	rs78838117	G	A	SLC22A18	NM_183233.2	exon4	c.257G>A	p.R86H	missense	0.060147	0	0	10/426	2/84	266/4290	10/102	T	B	B	D	Pathogenic	Rhabdomyosarcoma,_somatic
chr11	5246931	5225701	rs34484056	A	T	HBB	NM_000518.4	exon3	c.341T>A	p.V114E	missense	0.00033415	0	0	.	.	2/4290	.	D	D	D	D	Pathogenic	not_specified
chr11	5248200	5226970	rs33986703	T	A	HBB	NM_000518.4	exon1	c.52A>T	p.K18X	stopgain	0.000556917	0	0	.	.	1/4290	1/102	.	.	.	A	Pathogenic	Heinz_body_anemia|alpha_Thalassemia|Hb_SS_disease|beta_Thalassemia|beta^0^_Thalassemia|Fetal_hemoglobin_quantitative_trait_locus_1|Beta-thalassemia,_dominant_inclusion_body_type|Susceptibility_to_malaria|METHEMOGLOBINEMIA,_BETA_TYPE|Erythrocytosis_6,_familial|not_specified|not_provided
chr11	10521792	10500245	rs3741040	C	T	AMPD3	NM_000480.2	exon11	c.1744C>T	p.R582C	missense	0.00211628	0.000981162	0.0026	1/426	.	11/4290	.	D	D	D	A	Pathogenic	Erythrocyte_AMP_deaminase_deficiency
chr11	17409079	17387532	.	G	A	KCNJ11	NM_000525.3	exon1	c.560C>T	p.A187V	missense	0.000111383	0.000196232	3.19e-05	.	.	1/4290	.	D	D	D	D	Likely_pathogenic	Permanent_neonatal_diabetes_mellitus|Transient_neonatal_diabetes_mellitus_3|Islet_cell_hyperplasia
chr11	17415907	17394360	rs193922405	C	T	ABCC8	NM_001287174.1	exon37	c.4454G>A	p.G1485E	missense	0.000111383	0.00313972	0.0002	.	.	1/4290	.	D	D	D	D	Likely_pathogenic	Hyperinsulinemic_hypoglycemia,_familial,_1
chr11	17542493	17520946	.	C	T	USH1C	NM_153676.3	exon14	c.1134G>A	p.W378X	stopgain	0.000222767	0	0	2/426	.	.	.	.	.	.	A	Pathogenic	not_provided
chr11	17548299	17526752	.	C	G	USH1C	NM_153676.3	intron7	c.579+1G>C		splicing	0.000111383	0.000196232	0.0001	.	.	1/4290	.	.	.	.	D	Likely_pathogenic	Usher_syndrome,_type_1C|Deafness,_autosomal_recessive_18
chr11	17635243	17613696	rs397514608	C	T	OTOG	NM_001277269.1	exon38	c.6559C>T	p.R2187X	stopgain	0.000222767	0	3.19e-05	.	.	2/4290	.	.	.	.	A	Likely_pathogenic	Deafness,_autosomal_recessive_18b|not_provided
chr11	19207813	19186266	rs1057517870	G	A	CSRP3	NM_003476.4	exon4	c.364C>T	p.R122X	stopgain	0.000111383	0	0	.	.	.	1/102	.	.	.	A	Likely_pathogenic	Cardiomyopathy|not_provided
chr11	20657868	20636322	rs772652517	T	C	SLC6A5	NM_004211.3	exon11	c.1640T>C	p.F547S	missense	0.000222767	0	0	.	.	1/4290	1/102	D	D	D	D	Pathogenic/Likely_pathogenic	Hyperekplexia_3
chr11	34473759	34452212	rs761650208	G	A	CAT	NM_001752.3	intron4	c.480+5G>A		splicing	0.000111383	0	0	.	.	1/4290	.	.	.	.	.	Pathogenic	Acatalasemia,_japanese_type
chr11	34938005	34916458	.	AT	A	PDHX	NM_001135024.1	exon1	c.88delT	p.S30Pfs*16	frameshift deletion	0.000445534	0	0	.	1/84	1/4290	1/102	.	.	.	.	Likely_pathogenic	Pyruvate_dehydrogenase_E1-alpha_deficiency
chr11	45935882	45914331	rs1064794320	G	A	PEX16	NM_057174.2	exon7	c.679C>T	p.R227W	missense	0.000222767	0.348901	0.3416	.	.	2/4290	.	D	D	D	D	Likely_pathogenic	not_provided
chr11	48145375	48123823	rs1566734	A	C	PTPRJ	NM_002843.3	exon5	c.827A>C	p.Q276P	missense	0.267654	0	0	79/426	18/84	1129/4290	42/102	T	B	B	P	Pathogenic	Carcinoma_of_colon
chr11	60640687	60873214	rs587777362	TCCATTTTC	T	ZP1	NM_207341.3	exon7	c.1166_1173del	p.I390Tfs*16	frameshift deletion	0.000111383	0	0.0009	.	.	.	1/102	.	.	.	.	Pathogenic	Oocyte_maturation_defect_1
chr11	61161437	61393965	rs201108965	G	A	TMEM216	NM_001173991.2	exon3	c.218G>A	p.R73H	missense	0.00033415	0.00196232	0.0001	.	.	3/4290	.	D	P	P	D	Pathogenic	Joubert_syndrome_2|Meckel_syndrome_type_2
chr11	61724418	61956946	rs200277476	C	T	BEST1	NM_001139443.1	exon4	c.404C>T	p.A135V	missense	0.0013366	0	3.19e-05	.	.	2/4290	1/102	D	D	D	D	Likely_pathogenic	Retinal_dystrophy|Bestrophinopathy,_autosomal_recessive|not_provided
chr11	62382114	62614642	rs768652143	C	T	ROM1	NM_000327.3	exon3	c.859C>T	p.R287W	missense	0.000111383	0.00117739	0.0006	.	.	1/4290	.	D	D	D	D	Likely_pathogenic	Retinitis_pigmentosa
chr11	62458782	62691310	rs749890533	G	GC	BSCL2	NM_001122955.3	exon7	c.974dupG	p.I326Hfs*12	frameshift insertion	0.000222767	0	0	.	.	2/4290	.	.	.	.	.	Pathogenic	Congenital_generalized_lipodystrophy_type_2
chr11	64359297	64591825	rs121907896	G	A	SLC22A12	NM_144585.3	exon1	c.269G>A	p.R90H	missense	0.000556917	0.000392465	0	1/426	.	2/4290	1/102	T	D	P	A	Pathogenic	Familial_renal_hypouricemia|Hereditary_renal_hypouricemia
chr11	64367222	64599750	rs765990518	A	T	SLC22A12	NM_144585.3	exon7	c.1145A>T	p.Q382L	missense	0.0013366	0	3.18e-05	.	.	7/4290	.	D	D	D	D	Likely_pathogenic	Familial_renal_hypouricemia
chr11	64519456	64751984	rs377225525	G	A	PYGM	NM_005609.2	exon14	c.1708C>T	p.R570W	missense	0.000111383	0	0	.	.	1/4290	.	D	D	D	D	Likely_pathogenic	Glycogen_storage_disease,_type_V
chr11	67817250	68049783	rs371263807	C	T	TCIRG1	NM_006019.3	exon16	c.2008C>T	p.R670X	stopgain	0.000111383	0	3.19e-05	.	.	1/4290	.	.	.	.	A	Pathogenic	Osteopetrosis_autosomal_recessive_1|not_provided
chr11	68154098	68386630	rs80358308	C	T	LRP5	NM_002335.3	exon6	c.1330C>T	p.R444C	missense	0.000111383	0.000196232	3.19e-05	.	.	1/4290	.	D	P	B	A	Pathogenic	Exudative_vitreoretinopathy_4,_digenic
chr11	71148969	71437923	rs184297154	G	T	DHCR7	NM_001360.2	exon8	c.852C>A	p.F284L	missense	0.000556917	0	0	.	.	3/4290	.	D	D	P	D	Likely_pathogenic	Smith-Lemli-Opitz_syndrome
chr11	76914151	77203106	rs111033477	C	T	MYO7A	NM_000260.3	exon38	c.5215C>T	p.R1739X	stopgain	0.000111383	0	9.57e-05	.	.	1/4290	.	.	.	.	A	Pathogenic	not_provided
chr11	88911242	89178074	rs369291837	G	A	TYR	NM_000372.4	exon1	c.121G>A	p.G41R	missense	0.000445534	0	6.58e-05	.	.	2/4290	.	D	D	D	D	Likely_pathogenic	Oculocutaneous_albinism_type_1B|Tyrosinase-negative_oculocutaneous_albinism
chr11	88924446	89191278	rs61754375	G	A	TYR	NM_000372.4	exon2	c.896G>A	p.R299H	missense	0.000445534	0	0.0001	1/426	.	2/4290	.	D	D	D	A	Pathogenic	Tyrosinase-negative_oculocutaneous_albinism|Nonsyndromic_Oculocutaneous_Albinism|not_provided
chr11	89017955	89284787	rs62645916	G	T	TYR	NM_000372.4	exon4	c.1199G>T	p.W400L	missense	0.000779684	0	3.19e-05	1/426	.	4/4290	.	D	D	D	D	Pathogenic/Likely_pathogenic	Oculocutaneous_albinism_type_1B|Albinism,_ocular,_with_sensorineural_deafness|Skin/hair/eye_pigmentation,_variation_in,_3|Tyrosinase-negative_oculocutaneous_albinism|not_provided
chr11	94180442	94447276	rs774277300	G	A	MRE11	NM_005591.4	exon15	c.1726C>T	p.R576X	stopgain	0.000111383	0	6.37e-05	.	.	1/4290	.	.	.	.	A	Pathogenic	Hereditary_cancer-predisposing_syndrome|Ataxia-telangiectasia-like_disorder_1
chr11	94192628	94459462	.	CTG	C	MRE11	NM_005591.4	exon13	c.1444_1445del	p.Q482Afs*4	frameshift deletion	0.000111383	0	0.0003	.	.	1/4290	.	.	.	.	.	Pathogenic	Hereditary_cancer-predisposing_syndrome
chr11	95583005	95849841	rs121434403	C	A	MTMR2	NM_016156.5	exon9	c.826G>T	p.E276X	stopgain	0.000111383	0.000196232	6.37e-05	1/426	.	.	.	.	.	.	A	Pathogenic	Charcot-Marie-Tooth_disease,_type_4B1
chr11	102495949	102625218	rs587777516	C	T	MMP20	NM_004771.3	exon1	c.102G>A	p.W34X	stopgain	0.000111383	0	0	.	.	1/4290	.	.	.	.	A	Pathogenic	Amelogenesis_imperfecta,_hypomaturation_type,_IIA2
chr11	103006456	103135727	rs755883373	C	T	DYNC2H1	NM_001080463.1	exon17	c.2353C>T	p.R785X	stopgain	0.000111383	0	0.0003	.	.	1/4290	.	.	.	.	A	Likely_pathogenic	Short-rib_thoracic_dysplasia_3_with_or_without_polydactyly
chr11	103070876	103200147	rs770800903	G	T	DYNC2H1	NM_001080463.1	exon50	c.8190G>T	p.L2730F	missense	0.000222767	0	0	.	.	1/4290	.	D	D	D	D	Likely_pathogenic	Short-rib_thoracic_dysplasia_3_with_or_without_polydactyly
chr11	103124113	103253384	rs368631447	C	T	DYNC2H1	NM_001080463.1	exon67	c.10163C>T	p.P3388L	missense	0.000111383	0	0	.	.	1/4290	.	D	D	D	D	Likely_pathogenic	Jeune_thoracic_dystrophy|Short-rib_polydactyly_syndrome_type_III|not_specified
chr11	108017083	108146356	rs748303093	T	C	ACAT1	NM_000019.3	exon11	c.1160T>C	p.I387T	missense	0.000556917	0	0	.	1/84	2/4290	.	D	D	D	D	Likely_pathogenic	Deficiency_of_acetyl-CoA_acetyltransferase|not_provided
chr11	108121593	108250866	rs587781347	CAA	C	ATM	NM_000051.3	exon10	c.1402_1403del	p.K468Efs*18	frameshift deletion	0.000222767	0.000196232	3.19e-05	.	.	2/4290	.	.	.	.	.	Pathogenic/Likely_pathogenic	Ataxia-telangiectasia_syndrome|Hereditary_cancer-predisposing_syndrome|not_provided
chr11	108137897	108267170	.	G	A	ATM	NM_000051.3	intron17	c.2467-1G>A		splicing	0.000111383	0	0.0004	.	.	1/4290	.	.	.	.	D	Likely_pathogenic	Ataxia-telangiectasia_syndrome
chr11	108196079	108325352	.	G	A	ATM	NM_000051.3	exon46	c.6615G>A	p.W2205X	stopgain	0.000111383	0	0	.	.	1/4290	.	.	.	.	D	Pathogenic	Ataxia-telangiectasia_syndrome|Familial_cancer_of_breast|Hereditary_cancer-predisposing_syndrome
chr11	108213967	108343240	rs876659872	C	T	ATM	NM_000051.3	exon57	c.8287C>T	p.R2763X	stopgain	0.000111383	0	0	.	.	1/4290	.	.	.	.	D	Pathogenic	Ataxia-telangiectasia_syndrome|Hereditary_cancer-predisposing_syndrome
chr11	112103901	112233178	rs104894276	C	T	PTS	NM_000317.2	exon5	c.259C>T	p.P87S	missense	0.000779684	0	0	.	.	1/4290	.	T	P	P	A	Pathogenic	6-pyruvoyl-tetrahydropterin_synthase_deficiency
chr11	116691634	116820918	rs5110	C	A	APOA4	NM_000482.3	exon3	c.1140G>T	p.Q380H	missense	0.000111383	0	6.37e-05	.	1/84	.	.	T	B	B	N	Pathogenic	APOLIPOPROTEIN_A-IV_POLYMORPHISM,_APOA4*1/APOA4*2
chr11	116701353	116830637	rs76353203	C	T	APOC3	NM_000040.1	exon2	c.55C>T	p.R19X	stopgain	0.000111383	0	3.2e-05	.	.	1/4290	.	.	.	.	A	Pathogenic	Coronary_heart_disease|Hyperalphalipoproteinemia_2|not_provided
chr11	117860269	117989554	rs368287711	C	T	IL10RA	NM_001558.3	exon3	c.301C>T	p.R101W	missense	0.000445534	0	3.19e-05	1/426	.	2/4290	.	D	D	D	D	Pathogenic	Inflammatory_bowel_disease_28
chr11	118220582	118349867	rs779726987	T	TA	CD3G	NM_000073.2	exon3	c.205dupA	p.W72Mfs*6	frameshift insertion	0.000222767	0	0	1/426	.	.	.	.	.	.	.	Pathogenic	Immunodeficiency_17
chr11	118895980	119025270	rs80356491	CAG	C	SLC37A4	NM_001164278.1	exon11	c.1108_1109del	p.L370Vfs*53	frameshift deletion	0.000111383	0	3.19e-05	.	.	1/4290	.	.	.	.	.	Pathogenic/Likely_pathogenic	Inborn_genetic_diseases|Glycogen_storage_disease|Glucose-6-phosphate_transport_defect|Phosphate_transport_defect|not_provided
chr11	120998579	121127870	.	C	A	TECTA	NM_005422.2	exon8	c.1893C>A	p.C631X	stopgain	0.000222767	0	0	.	.	1/4290	.	.	.	.	A	Pathogenic	not_provided
chr12	5155040	5045874	rs121908592	C	T	KCNA5	NM_002234.3	exon1	c.1727C>T	p.A576V	missense	0.000891067	0	0	.	.	2/4290	.	T	B	B	A	Pathogenic	Atrial_fibrillation,_familial,_7
chr12	6153596	6044430	rs772203447	C	T	VWF	NM_000552.3	exon18	c.2303G>A	p.R768Q	missense	0.000556917	0	6.38e-05	1/426	.	1/4290	.	T	B	B	D	Likely_pathogenic	von_Willebrand_disorder
chr12	21349909	21196975	rs183501729	C	T	SLCO1B1	NM_006446.4	exon8	c.757C>T	p.R253X	stopgain	0.00178213	0	0	2/426	1/84	8/4290	.	.	.	.	A	Pathogenic	Rotor_syndrome|not_provided
chr12	21627807	21474873	rs376037221	A	C	RECQL	NM_002907.3	exon11	c.1323T>G	p.Y441X	stopgain	0.000111383	0	6.39e-05	1/426	.	.	.	.	.	.	A	Likely_pathogenic	not_provided
chr12	21630808	21477874	rs572725483	G	A	RECQL	NM_002907.3	exon7	c.796C>T	p.Q266X	stopgain	0.00033415	0	0	.	.	2/4290	.	.	.	.	A	Likely_pathogenic	Hereditary_cancer-predisposing_syndrome
chr12	21644546	21491612	rs771968849	C	CT	RECQL	NM_002907.3	exon3	c.120dupA	p.V41Sfs*14	frameshift insertion	0.000222767	0	3.2e-05	.	.	2/4290	.	.	.	.	.	Pathogenic	Hereditary_cancer-predisposing_syndrome
chr12	32974457	32821523	rs762753884	G	A	PKP2	NM_004572.3	exon10	c.1978C>T	p.Q660X	stopgain	0.000111383	0	0	.	.	1/4290	.	.	.	.	A	Pathogenic	Arrhythmogenic_right_ventricular_cardiomyopathy,_type_9
chr12	33049514	32896580	rs397516997	ACTGT	A	PKP2	NM_004572.3	exon1	c.148_151del	p.T50Sfs*61	frameshift deletion	0.000111383	0	6.37e-05	.	.	1/4290	.	.	.	.	.	Pathogenic	Cardiomyopathy|Arrhythmogenic_right_ventricular_cardiomyopathy|Arrhythmogenic_right_ventricular_cardiomyopathy,_type_9|not_provided
chr12	49312166	48918383	.	C	T	CCDC65	NM_033124.4	exon5	c.718C>T	p.R240X	stopgain	0.000111383	0	0	.	.	1/4290	.	.	.	.	D	Pathogenic	Ciliary_dyskinesia,_primary,_27
chr12	49360262	48966479	rs766021478	C	T	WNT10B	NM_003394.3	exon5	c.786G>A	p.W262X	stopgain	0.000779684	0	0	.	.	5/4290	.	.	.	.	D	Pathogenic	Tooth_agenesis,_selective,_8
chr12	56115253	55721469	rs774122562	G	A	RDH5	NM_001199771.1	exon2	c.285G>A	p.W95X	stopgain	0.000222767	0	0	.	.	1/4290	.	.	.	.	A	Pathogenic	Pigmentary_retinal_dystrophy|Fundus_albipunctatus,_autosomal_recessive|not_provided
chr12	58160653	57766870	rs763437121	G	GC	CYP27B1	NM_000785.3	exon1	c.171dupG	p.L58Afs*275	frameshift insertion	0.000111383	0	0	.	.	1/4290	.	.	.	.	.	Pathogenic	not_provided
chr12	58190032	57796249	rs376562033	C	T	TSFM	NM_001172696.1	exon7	c.707C>T	p.S236F	missense	0.000111383	0	0	1/426	.	.	.	D	D	D	D	Likely_pathogenic	not_provided
chr12	76740374	76346594	rs759682922	G	C	BBS10	NM_024685.3	exon2	c.1391C>G	p.S464X	stopgain	0.000222767	0	0	.	.	2/4290	.	.	.	.	D	Likely_pathogenic	Bardet-Biedl_syndrome_10
chr12	80645498	80251718	rs368844341	C	T	OTOGL	NM_173591.3	exon11	c.1051C>T	p.R351X	stopgain	0.000111383	0	3.19e-05	.	.	1/4290	.	.	.	.	A	Likely_pathogenic	Rare_genetic_deafness
chr12	88452645	88058868	rs760540562	C	T	CEP290	NM_025114.3	exon49	c.6798G>A	p.W2266X	stopgain	0.00033415	0.00215856	0.0029	.	.	1/4290	.	.	.	.	A	Pathogenic	Nephronophthisis|Joubert_syndrome|Meckel-Gruber_syndrome|not_provided
chr12	88454772	88060995	rs766670248	C	T	CEP290	NM_025114.3	intron46	c.6358-1G>A		splicing	0.000111383	0	0	.	.	1/4290	.	.	.	.	D	Likely_pathogenic	Nephronophthisis|Joubert_syndrome|Meckel-Gruber_syndrome
chr12	88476856	88083079	rs764309755	CTT	C	CEP290	NM_025114.3	exon37	c.4962_4963del	p.E1656Nfs*3	frameshift deletion	0.000111383	0	3.2e-05	.	.	1/4290	.	.	.	.	.	Pathogenic	Nephronophthisis|Joubert_syndrome|Meckel-Gruber_syndrome|not_provided
chr12	88512304	88118527	rs769761100	A	AT	CEP290	NM_025114.3	exon17	c.1666dupA	p.I556Nfs*20	frameshift insertion	0.0013366	0	0	2/426	.	7/4290	1/102	.	.	.	.	Pathogenic	Joubert_syndrome_5|Joubert_syndrome_1
chr12	88512304	88118527	rs747983279	AT	A	CEP290	NM_025114.3	exon17	c.1666delA	p.I556Ffs*17	frameshift deletion	0.000779684	0	0.0004	1/426	.	6/4290	.	.	.	.	.	Pathogenic	Nephronophthisis|Joubert_syndrome|Leber_congenital_amaurosis|Meckel-Gruber_syndrome|Joubert_syndrome_5|Joubert_syndrome_1
chr12	102122887	101729109	rs769825641	A	G	SYCP3	NM_001177949.1	exon8	c.657T>C	p.T219T	synonymous	0.000222767	0	6.38e-05	1/426	.	.	.	.	.	.	.	Pathogenic	Spermatogenesis_arrest
chr12	102147187	101753409	rs137852897	G	A	GNPTAB	NM_024312.4	exon19	c.3565C>T	p.R1189X	stopgain	0.000111383	0	0.0002	1/426	.	.	.	.	.	.	A	Pathogenic	Pseudo-Hurler_polydystrophy|I_cell_disease|not_provided
chr12	102157979	101764201	rs281865031	C	T	GNPTAB	NM_024312.4	intron13	c.2715+1G>A		splicing	0.00033415	0	0	1/426	.	.	.	.	.	.	D	Pathogenic	Pseudo-Hurler_polydystrophy|I_cell_disease
chr12	103234192	102840414	rs199475659	G	T	PAH	NM_000277.1	exon12	c.1301C>A	p.A434D	missense	0.000111383	0.000392465	3.19e-05	.	.	1/4290	.	D	D	D	D	Likely_pathogenic	Phenylketonuria|not_provided
chr12	103237484	102843706	rs62642937	G	A	PAH	NM_000277.1	exon11	c.1139C>T	p.T380M	missense	0.000222767	0	3.18e-05	.	.	2/4290	.	D	D	D	A	Pathogenic	Hyperphenylalaninemia,_non-pku|Phenylketonuria|Marfanoid_habitus_and_intellectual_disability|not_provided
chr12	103246591	102852813	rs62514955	A	T	PAH	NM_000277.1	intron7	c.842+2T>A		splicing	0.000111383	0	0	.	.	1/4290	.	.	.	.	D	Pathogenic	Phenylketonuria|not_provided
chr12	103246597	102852819	rs62508698	C	T	PAH	NM_000277.1	exon7	c.838G>A	p.E280K	missense	0.000222767	0	9.56e-05	.	.	1/4290	.	D	D	D	D	Pathogenic	Phenylketonuria|not_provided
chr12	103246653	102852875	rs5030849	C	T	PAH	NM_000277.1	exon7	c.782G>A	p.R261Q	missense	0.000222767	0	0	1/426	.	1/4290	.	D	D	D	D	Pathogenic	Phenylketonuria|not_provided
chr12	103246708	102852930	rs5030846	G	A	PAH	NM_000277.1	exon7	c.727C>T	p.R243X	stopgain	0.000222767	0.000196232	3.19e-05	.	.	1/4290	.	.	.	.	A	Pathogenic	Phenylketonuria|not_provided
chr12	103246714	102852936	rs76687508	G	A	PAH	NM_000277.1	exon7	c.721C>T	p.R241C	missense	0.00111383	0	0	1/426	.	5/4290	.	D	D	D	D	Pathogenic	Phenylketonuria|not_provided
chr12	103248932	102855154	rs62516152	C	T	PAH	NM_000277.1	exon6	c.688G>A	p.V230I	missense	0.000111383	0	0	1/426	.	.	.	T	B	B	D	Likely_pathogenic	Phenylketonuria|not_provided
chr12	103249009	102855231	rs62514927	T	C	PAH	NM_000277.1	exon6	c.611A>G	p.Y204C	missense	0.00033415	0	0	1/426	.	1/4290	.	D	P	P	A	Pathogenic	Phenylketonuria|not_provided
chr12	103249093	102855315	rs74486803	C	T	PAH	NM_000277.1	exon6	c.527G>A	p.R176Q	missense	0.000111383	0.000588697	9.56e-05	.	.	1/4290	.	D	B	B	N	Likely_pathogenic	Phenylketonuria|not_provided
chr12	103249104	102855326	rs192592111	C	A	PAH	NM_000277.1	exon6	c.516G>T	p.Q172H	missense	0.0006683	0	0	.	.	3/4290	.	D	D	D	D	Pathogenic	Phenylketonuria
chr12	103288534	102894756	rs76296470	G	A	PAH	NM_000277.1	exon3	c.331C>T	p.R111X	stopgain	0.000445534	0	0.0002	.	.	1/4290	.	.	.	.	A	Pathogenic	Phenylketonuria|not_provided
chr12	103288545	102894767	rs542645236	T	C	PAH	NM_000277.1	exon3	c.320A>G	p.H107R	missense	0.000445534	0.000196232	0	.	1/84	3/4290	.	T	B	B	D	Pathogenic/Likely_pathogenic	Phenylketonuria
chr12	112910785	112472981	rs376607329	G	A	PTPN11	NM_002834.3	exon7	c.794G>A	p.R265Q	missense	0.000111383	0	0	1/426	.	.	.	D	D	P	D	Pathogenic	PTPN11-related_disorder|Noonan_syndrome|Inborn_genetic_diseases|Metachondromatosis|Noonan_syndrome_1|Rasopathy|not_provided
chr12	121174900	120737097	rs117356004	G	A	ACADS	NM_000017.3	exon3	c.322G>A	p.G108S	missense	0.000111383	0	0	.	.	1/4290	.	T	D	D	D	Likely_pathogenic	not_provided
chr12	121416600	120978797	rs774637975	C	T	HNF1A	NM_000545.6	exon1	c.29C>T	p.T10M	missense	0.00033415	0	0.0002	.	.	1/4290	.	D	D	B	D	Likely_pathogenic	Maturity-onset_diabetes_of_the_young,_type_3
chr12	123741471	123256924	rs397514539	C	T	C12orf65	NM_001194995.1	exon3	c.394C>T	p.R132X	stopgain	0.000111383	0	0	.	.	1/4290	.	.	.	.	D	Pathogenic	Spastic_paraplegia_55,_autosomal_recessive|not_provided
chr13	20763209	20189070	rs773528125	G	GCGTT	GJB2	NM_004004.5	exon2	c.511_512insAACG	p.A171Efs*40	frameshift insertion	0.000111383	0	9.56e-05	.	.	1/4290	.	.	.	.	.	Pathogenic/Likely_pathogenic	Deafness,_autosomal_recessive_1A|not_provided
chr13	20763420	20189281	rs111033204	CAT	C	GJB2	NM_004004.5	exon2	c.299_300del	p.H100Rfs*14	frameshift deletion	0.00167075	0.000196232	0.0001	1/426	.	8/4290	.	.	.	.	.	Pathogenic	Deafness,_autosomal_recessive_1A|Deafness,_autosomal_recessive_1b|not_specified|not_provided|Rare_genetic_deafness
chr13	20763485	20189346	rs80338943	AG	A	GJB2	NM_004004.5	exon2	c.235delC	p.L79Cfs*3	frameshift deletion	0.00779684	0	9.55e-05	2/426	1/84	40/4290	.	.	.	.	.	Pathogenic	Hearing_impairment|Deafness,_autosomal_recessive_1A|Deafness,_digenic,_GJB2/GJB3|Deafness,_autosomal_recessive_1b|Deafness,_autosomal_dominant_3a|Hearing_loss|Nonsyndromic_hearing_loss_and_deafness|not_specified|not_provided|Rare_genetic_deafness
chr13	20763491	20189352	rs104894395	C	T	GJB2	NM_004004.5	exon2	c.230G>A	p.W77X	stopgain	0.000111383	0	0	.	.	1/4290	.	.	.	.	A	Pathogenic/Likely_pathogenic	Deafness,_autosomal_recessive_1A|Rare_genetic_deafness
chr13	20763529	20189390	rs750188782	GCACACGTTCTTGCAGC	G	GJB2	NM_004004.5	exon2	c.176_191del	p.G59Afs*18	frameshift deletion	0.00033415	0	0	.	.	2/4290	.	.	.	.	.	Pathogenic	Deafness,_autosomal_recessive_1A|not_specified|not_provided
chr13	20763612	20189473	rs72474224	C	T	GJB2	NM_004004.5	exon2	c.109G>A	p.V37I	missense	0.0976832	0	0	10/426	5/84	425/4290	14/102	T	D	D	A	Pathogenic	Hearing_impairment|Keratitis-ichthyosis-deafness_syndrome,_autosomal_dominant|Mutilating_keratoderma|Knuckle_pads,_deafness_AND_leukonychia_syndrome|Keratoderma_palmoplantar_deafness|Deafness,_X-linked_2|Hystrix-like_ichthyosis_with_deafness|Deafness,_autosomal_recessive_1A|Deafness,_autosomal_recessive_1b|Deafness,_autosomal_dominant_3a|Nonsyndromic_hearing_loss_and_deafness|not_specified|not_pr…
chr13	20797501	20223362	rs780320724	G	A	GJB6	NM_001110219.2	exon5	c.119C>T	p.A40V	missense	0.000111383	0	0	.	.	.	1/102	D	D	D	D	Pathogenic	Deafness,_autosomal_dominant_3b
chr13	23898596	23324457	rs780348174	CTG	C	SGCG	NM_000231.2	exon8	c.793_794del	p.C267Sfs*51	frameshift deletion	0.000111383	0	0	.	.	1/4290	.	.	.	.	.	Likely_pathogenic	Severe_autosomal_recessive_muscular_dystrophy_of_childhood_-_North_African_type
chr13	23907325	23333186	rs779338945	TAAAG	T	SACS	NM_014363.5	exon10	c.10686_10689del	p.F3562Lfs*8	frameshift deletion	0.000111383	0.000588697	3.18e-05	.	.	.	1/102	.	.	.	.	Likely_pathogenic	Spastic_ataxia_Charlevoix-Saguenay_type
chr13	23915108	23340969	.	ACTGT	A	SACS	NM_014363.5	exon10	c.2903_2906del	p.D968Vfs*13	frameshift deletion	0.000111383	0	0	.	.	1/4290	.	.	.	.	.	Pathogenic	Spastic_paraplegia|Spastic_ataxia_Charlevoix-Saguenay_type
chr13	32907420	32333283	rs80359307	GA	G	BRCA2	NM_000059.3	exon10	c.1806delA	p.I605Yfs*9	frameshift deletion	0.000222767	0	0	.	.	2/4290	.	.	.	.	.	Pathogenic	Hereditary_breast_and_ovarian_cancer_syndrome|Hereditary_cancer-predisposing_syndrome|Breast-ovarian_cancer,_familial_2|not_provided
chr13	32913836	32339699	rs80358757	C	T	BRCA2	NM_000059.3	exon11	c.5344C>T	p.Q1782X	stopgain	0.000111383	0.000392465	0.0002	.	.	1/4290	.	.	.	.	A	Pathogenic	Hereditary_breast_and_ovarian_cancer_syndrome|Breast-ovarian_cancer,_familial_2
chr13	32920978	32346841	rs80358920	C	T	BRCA2	NM_000059.3	exon13	c.6952C>T	p.R2318X	stopgain	0.000111383	0	0	1/426	.	.	.	.	.	.	A	Pathogenic	Medulloblastoma|Malignant_tumor_of_prostate|Neoplasm_of_the_breast|Ovarian_Neoplasms|Hereditary_breast_and_ovarian_cancer_syndrome|Familial_cancer_of_breast|Hereditary_cancer-predisposing_syndrome|Fanconi_anemia,_complementation_group_D1|Breast-ovarian_cancer,_familial_2|Glioma_susceptibility_3|Pancreatic_cancer_2|Wilms_tumor_1|not_provided
chr13	37453700	36879563	rs397514715	T	C	SMAD9	NM_001127217.2	exon2	c.127A>G	p.K43E	missense	0.000222767	0.000392465	0.0003	1/426	.	.	.	D	D	D	D	Pathogenic	Primary_pulmonary_hypertension_2
chr13	41383712	40809576	rs121908535	C	T	SLC25A15	NM_014252.3	exon7	c.815C>T	p.T272I	missense	0.000222767	0.000588697	0.0004	.	.	2/4290	.	D	D	D	A	Likely_pathogenic	Hyperornithinemia-hyperammonemia-homocitrullinuria_syndrome
chr13	42385421	41811285	rs138075452	C	T	VWA8	NM_015058.1	exon17	c.2003G>A	p.R668Q	missense	0.000222767	0	0.0002	.	.	1/4290	.	D	D	D	D	Likely_pathogenic	Nonsyndromic_cleft_lip_palate
chr13	50126317	49552181	rs777630688	GT	G	RCBTB1	NM_018191.3	exon7	c.707delA	p.N236Tfs*11	frameshift deletion	0.000222767	0	0	.	.	2/4290	.	.	.	.	.	Likely_pathogenic	Exudative_retinopathy
chr13	52509739	51935603	rs755584106	G	A	ATP7B	NM_000053.3	exon20	c.4114C>T	p.Q1372X	stopgain	0.00033415	0	0	.	1/84	1/4290	.	.	.	.	D	Pathogenic	Wilson_disease
chr13	52520472	51946336	rs775055397	G	A	ATP7B	NM_000053.3	exon13	c.3008C>T	p.A1003V	missense	0.000111383	0	3.19e-05	.	.	1/4290	.	D	D	D	D	Likely_pathogenic	Wilson_disease
chr13	52520505	51946369	rs201038679	G	A	ATP7B	NM_000053.3	exon13	c.2975C>T	p.P992L	missense	0.00189352	0	0	1/426	.	9/4290	.	D	D	D	D	Pathogenic	Wilson_disease|not_provided
chr13	52523908	51949772	rs121907993	G	C	ATP7B	NM_000053.3	exon12	c.2755C>G	p.R919G	missense	0.000556917	0	0	.	.	3/4290	.	D	P	B	D	Pathogenic	Wilson_disease
chr13	52532469	51958333	rs28942074	C	A	ATP7B	NM_000053.3	exon8	c.2333G>T	p.R778L	missense	0.00178213	0	0	.	.	13/4290	.	D	D	D	A	Pathogenic	Wilson_disease|not_provided
chr13	52532497	51958361	rs587779354	TG	T	ATP7B	NM_000053.3	exon8	c.2304delC	p.M769Cfs*38	frameshift deletion	0.000111383	0	0	.	.	1/4290	.	.	.	.	.	Pathogenic	Wilson_disease
chr13	52532497	51958361	rs137853287	T	TG	ATP7B	NM_000053.3	exon8	c.2304dupC	p.M769Hfs*26	frameshift insertion	0.000222767	0	3.19e-05	.	.	2/4290	.	.	.	.	.	Pathogenic	Inborn_genetic_diseases|Wilson_disease
chr13	52532508	51958372	.	T	C	ATP7B	NM_000053.3	exon8	c.2294A>G	p.D765G	missense	0.000445534	0	0	.	.	3/4290	.	D	D	D	D	Pathogenic/Likely_pathogenic	Wilson_disease
chr13	52544640	51970504	.	G	A	ATP7B	NM_000053.3	exon3	c.1531C>T	p.Q511X	stopgain	0.000111383	0	9.66e-05	.	.	1/4290	.	.	.	.	A	Pathogenic	Wilson_disease
chr13	52549234	51975098	rs201738967	T	C	ATP7B	NM_000053.3	exon2	c.122A>G	p.N41S	missense	0.000222767	0	0	1/426	.	1/4290	.	D	D	D	D	Likely_pathogenic	Wilson_disease|not_provided
chr13	73409497	72835359	rs17089782	G	A	PIBF1	NM_006346.2	exon9	c.1214G>A	p.R405Q	missense	0.0498998	0	0	31/426	3/84	203/4290	3/102	D	D	D	D	Likely_pathogenic	Joubert_syndrome|JOUBERT_SYNDROME_33
chr13	77569310	76995175	rs386833971	C	T	CLN5	NM_006493.2	exon2	c.286C>T	p.R96X	stopgain	0.000111383	0.000196232	0	.	.	1/4290	.	.	.	.	A	Likely_pathogenic	Ceroid_lipofuscinosis_neuronal_5
chr13	77581682	77007547	rs764008859	TA	T	FBXL3	NM_012158.2	exon5	c.884delT	p.L295Yfs*25	frameshift deletion	0.000556917	0	0	1/426	.	4/4290	.	.	.	.	.	Pathogenic	Mental_retardation,_short_stature,_facial_anomalies,_and_joint_dislocations
chr13	78477673	77903538	rs781214034	C	T	EDNRB	NM_001201397.1	exon3	c.823G>A	p.V275M	missense	0.000222767	0	3.25e-05	.	.	1/4290	.	T	D	D	D	Likely_pathogenic	Hearing_impairment|Total_intestinal_aganglionosis
chr13	108862341	108209993	rs772226399	CTCTTT	C	LIG4	NM_002312.3	exon2	c.1271_1275del	p.K424Rfs*20	frameshift deletion	0.00033415	0.000196232	3.19e-05	.	.	3/4290	.	.	.	.	.	Pathogenic	Lig4_syndrome|LIG4-Related_Disorders|not_provided
chr13	113771190	113116876	rs769452933	G	T	F7	NM_000131.4	intron7	c.681+1G>T		splicing	0.000222767	0.000196232	6.38e-05	.	.	1/4290	.	.	.	.	D	Likely_pathogenic	Factor_VII_deficiency
chr13	113771827	113117513	.	C	A	F7	NM_000131.4	exon8	c.722C>A	p.T241N	missense	0.00100245	0	9.56e-05	.	.	5/4290	.	D	P	P	N	Likely_pathogenic	Factor_VII_deficiency
chr13	113772768	113118454	rs779589651	C	T	F7	NM_000131.4	exon9	c.847C>T	p.R283W	missense	0.000222767	0	0	.	.	2/4290	.	D	D	D	N	Pathogenic	Abnormality_of_coagulation
chr13	113773086	113118772	rs121964934	T	G	F7	NM_000131.4	exon9	c.1165T>G	p.C389G	missense	0.000222767	0	0.0001	.	.	.	1/102	D	D	D	D	Pathogenic	Factor_VII_deficiency
chr13	113773145	113118831	rs121964936	T	G	F7	NM_000131.4	exon9	c.1224T>G	p.H408Q	missense	0.0006683	0	0	1/426	.	4/4290	.	D	D	D	D	Pathogenic	Factor_VII_deficiency
chr14	20916116	20447957	rs773173317	C	T	OSGEP	NM_017807.3	exon8	c.740G>A	p.R247Q	missense	0.000111383	0	0	.	.	1/4290	.	D	D	D	D	Pathogenic	GALLOWAY-MOWAT_SYNDROME_3
chr14	21789416	21321257	rs751342895	A	G	RPGRIP1	NM_020366.3	intron11	c.1468-2A>G		splicing	0.000222767	0	0	.	.	1/4290	.	.	.	.	D	Pathogenic	not_provided
chr14	23249134	22779925	rs386833822	C	T	SLC7A7	NM_001126106.2	intron4	c.625+1G>A		splicing	0.000445534	0.000196232	6.37e-05	1/426	.	2/4290	.	.	.	.	D	Pathogenic/Likely_pathogenic	Lysinuric_protein_intolerance
chr14	23896042	23426833	rs371898076	C	T	MYH7	NM_000257.3	exon18	c.1988G>A	p.R663H	missense	0.000111383	0	0	.	.	1/4290	.	D	P	P	D	Pathogenic	Hypertrophic_cardiomyopathy|Primary_familial_hypertrophic_cardiomyopathy|Congenital_myopathy_with_fiber_type_disproportion|Dilated_cardiomyopathy_1S|Myosin_storage_myopathy|Myopathy,_myosin_storage,_autosomal_recessive|Familial_hypertrophic_cardiomyopathy_1|Myopathy,_distal,_1|Scapuloperoneal_myopathy,_MYH7-related|not_specified|Cardiovascular_phenotype|not_provided
chr14	24624888	24155679	rs377035972	G	A	RNF31	NM_017999.4	exon14	c.2480G>A	p.R827H	missense	0.000111383	0	6.37e-05	.	.	1/4290	.	T	D	D	D	Likely_pathogenic	Short_stature
chr14	24730989	24261783	rs139208806	T	C	TGM1	NM_000359.2	exon3	c.420A>G	p.I140M	missense	0.00111383	0	0	.	1/84	2/4290	.	D	D	D	D	Likely_pathogenic	not_provided
chr14	50768850	50302132	rs267607206	T	C	L2HGDH	NM_024884.2	exon3	c.293A>G	p.H98R	missense	0.000222767	0	0	.	.	2/4290	.	D	D	D	D	Likely_pathogenic	L-2-hydroxyglutaric_aciduria|not_provided
chr14	51378873	50912155	rs113993982	C	T	PYGL	NM_002863.4	intron14	c.1768+1G>A		splicing	0.00033415	0	0	1/426	.	.	.	.	.	.	A	Pathogenic	Glycogen_storage_disease,_type_VI
chr14	58934551	58467833	rs1064793157	C	T	KIAA0586	NM_001244189.1	exon18	c.2512C>T	p.R838X	stopgain	0.000111383	0	0	.	1/84	.	.	.	.	.	A	Pathogenic	not_provided
chr14	68191285	67724568	rs766631462	C	T	RDH12	NM_152443.2	exon4	c.164C>T	p.T55M	missense	0.000222767	0	6.37e-05	1/426	.	1/4290	.	D	D	D	D	Pathogenic/Likely_pathogenic	Leber_congenital_amaurosis|Leber_congenital_amaurosis_13
chr14	68192801	67726084	rs202126574	C	T	RDH12	NM_152443.2	exon6	c.377C>T	p.A126V	missense	0.000111383	0	3.19e-05	1/426	.	.	.	D	D	D	A	Pathogenic	Retinitis_pigmentosa|Retinitis_pigmentosa_53
chr14	74533476	74066773	rs781767219	G	A	ALDH6A1	NM_005589.3	exon9	c.1156C>T	p.R386X	stopgain	0.000111383	0	0	.	1/84	.	.	.	.	.	D	Likely_pathogenic	Methylmalonate_semialdehyde_dehydrogenase_deficiency
chr14	74969614	74502911	rs137854860	C	T	LTBP2	NM_000428.2	exon34	c.4912G>A	p.V1638M	missense	0.000111383	0	0	.	.	1/4290	.	D	D	D	D	Likely_pathogenic	Primary_open_angle_glaucoma
chr14	75470068	75003365	rs397514648	T	A	EIF2B2	NM_014239.3	exon2	c.254T>A	p.V85E	missense	0.0006683	0.00196232	0.0003	1/426	.	1/4290	.	D	D	D	D	Pathogenic	Leukoencephalopathy_with_vanishing_white_matter
chr14	76455273	75988930	rs140366557	G	A	IFT43	NM_052873.2	exon2	c.100G>A	p.E34K	missense	0.000891067	0	3.19e-05	1/426	.	3/4290	.	T	D	P	N	Likely_pathogenic	Retinitis_pigmentosa_81
chr14	81609751	81143407	rs189261858	G	A	TSHR	NM_000369.2	exon10	c.1349G>A	p.R450H	missense	0.00122522	0	6.38e-05	1/426	.	7/4290	.	D	D	D	D	Pathogenic	Congenital_hypothyroidism|Hypothyroidism,_congenital,_nongoitrous,_1|not_provided
chr14	88401093	87934749	rs200607029	C	T	GALC	NM_000153.3	exon17	c.2041G>A	p.V681M	missense	0.0006683	0	0	4/426	.	2/4290	.	D	D	D	D	Likely_pathogenic	Galactosylceramide_beta-galactosidase_deficiency
chr14	88406259	87939915	rs138577661	A	G	GALC	NM_000153.3	exon16	c.1901T>C	p.L634S	missense	0.00980174	0	0	7/426	2/84	41/4290	.	D	D	D	D	Pathogenic/Likely_pathogenic	Galactosylceramide_beta-galactosidase_deficiency
chr14	88411975	87945631	rs200378205	C	T	GALC	NM_000153.3	exon14	c.1592G>A	p.R531H	missense	0.000779684	0	0	.	.	4/4290	1/102	D	D	D	D	Pathogenic/Likely_pathogenic	Galactosylceramide_beta-galactosidase_deficiency|not_provided
chr14	88434678	87968334	rs750524447	C	T	GALC	NM_000153.3	intron8	c.908+1G>A		splicing	0.000111383	0	3.19e-05	1/426	.	.	.	.	.	.	D	Likely_pathogenic	Galactosylceramide_beta-galactosidase_deficiency
chr14	88883138	88416794	rs80044281	C	T	SPATA7	NM_018418.4	exon5	c.322C>T	p.R108X	stopgain	0.000111383	0.000981162	0	.	.	1/4290	.	.	.	.	A	Likely_pathogenic	Leber_congenital_amaurosis_3|SPATA7-Related_Disorders
chr15	28230247	27985101	rs121918166	C	T	OCA2	NM_000275.2	exon13	c.1327G>A	p.V443I	missense	0.000779684	0	0	.	.	4/4290	1/102	D	D	D	A	Pathogenic	Inborn_genetic_diseases|Tyrosinase-positive_oculocutaneous_albinism|Skin/hair/eye_pigmentation,_variation_in,_1|not_provided
chr15	32929343	32637142	rs555387669	CAT	C	ARHGAP11A	NM_014783.4	exon12	c.2370_2371del	p.C791*	stopgain	0.000556917	0	3.19e-05	.	.	4/4290	.	.	.	.	.	Likely_pathogenic	Inborn_genetic_diseases
chr15	40710389	40418190	rs773560012	A	G	IVD	NM_002225.3	exon12	c.1199A>G	p.Y400C	missense	0.000556917	0	0	.	.	2/4290	.	D	D	P	D	Pathogenic/Likely_pathogenic	Isovaleryl-CoA_dehydrogenase_deficiency
chr15	42702630	42410432	rs200379491	A	G	CAPN3	NM_000070.2	exon20	c.2120A>G	p.D707G	missense	0.0013366	0	0	1/426	.	8/4290	.	T	D	D	D	Pathogenic/Likely_pathogenic	Limb-girdle_muscular_dystrophy,_type_2A|not_provided
chr15	43022830	42730632	rs80338696	G	A	CDAN1	NM_138477.2	exon14	c.2140C>T	p.R714W	missense	0.0006683	0	6.37e-05	.	.	5/4290	.	D	D	P	A	Likely_pathogenic	Congenital_dyserythropoietic_anemia,_type_I
chr15	43552349	43260151	rs112292549	C	A	TGM5	NM_201631.3	exon3	c.337G>T	p.G113C	missense	0.000111383	0.000196232	6.37e-05	.	.	1/4290	.	D	D	D	A	Pathogenic	Inborn_genetic_diseases|Peeling_skin_syndrome_2|not_provided
chr15	44905697	44613499	rs312262752	C	CT	SPG11	NM_025137.3	exon17	c.3075dupA	p.E1026Rfs*4	frameshift insertion	0.000111383	0	0.0003	.	.	1/4290	.	.	.	.	.	Pathogenic	Spastic_paraplegia_11,_autosomal_recessive
chr15	44949427	44657229	rs312262720	CAT	C	SPG11	NM_025137.3	exon4	c.733_734del	p.M245Vfs*2	frameshift deletion	0.00033415	0.000196232	0	.	.	2/4290	.	.	.	.	.	Pathogenic	Hereditary_spastic_paraplegia|Spastic_paraplegia_11,_autosomal_recessive|Amyotrophic_lateral_sclerosis_type_5|not_provided
chr15	45391934	45099736	rs748194265	AG	A	DUOX2	NM_014080.4	exon25	c.3340delC	p.L1114Sfs*56	frameshift deletion	0.000111383	0	3.19e-05	.	.	1/4290	.	.	.	.	.	Likely_pathogenic	Thyroid_dyshormonogenesis_6|not_provided
chr15	45391946	45099748	rs368488511	C	T	DUOX2	NM_014080.4	exon25	c.3329G>A	p.R1110Q	missense	0.00300735	0	0	3/426	.	12/4290	.	D	D	P	D	Pathogenic	not_provided
chr15	45398525	45106327	rs748793969	G	T	DUOX2	NM_014080.4	exon17	c.1946C>A	p.A649E	missense	0.000222767	0	0	.	.	1/4290	.	D	D	P	D	Likely_pathogenic	Nongoitrous_Euthyroid_Hyperthyrotropinemia|Thyroid_dyshormonogenesis_6
chr15	45399648	45107450	rs180671269	T	A	DUOX2	NM_014080.4	exon14	c.1588A>T	p.K530X	stopgain	0.0154823	0	0	2/426	1/84	61/4290	3/102	.	.	.	A	Pathogenic	Thyroid_dyshormonogenesis_6|not_provided
chr15	45400357	45108159	rs191759494	C	T	DUOX2	NM_014080.4	exon13	c.1462G>A	p.G488R	missense	0.00033415	0	0.0003	.	.	3/4290	.	D	D	D	D	Pathogenic/Likely_pathogenic	Nongoitrous_Euthyroid_Hyperthyrotropinemia|Thyroid_dyshormonogenesis_6|Familial_thyroid_dyshormonogenesis
chr15	45408785	45116587	rs1085307064	T	TA	DUOXA2	NM_207581.3	exon4	c.413dupA	p.Y138*	stopgain	0.00311874	0	0	1/426	1/84	13/4290	.	.	.	.	.	Pathogenic	Thyroglobulin_synthesis_defect
chr15	45409472	45117274	rs4774518	C	G	DUOXA2	NM_207581.3	exon5	c.738C>G	p.Y246X	stopgain	0.00256182	0.30416	0.2737	2/426	.	14/4290	.	.	.	.	D	Pathogenic	Thyroglobulin_synthesis_defect
chr15	48434399	48142202	rs886037644	C	CT	SLC24A5	NM_205850.2	exon9	c.1355dupT	p.L454Ffs*33	frameshift insertion	0.000222767	0	0	1/426	.	.	.	.	.	.	.	Pathogenic	Albinism,_oculocutaneous,_type_VI
chr15	53907881	53615684	rs768446132	A	T	WDR72	NM_182758.3	exon15	c.2522T>A	p.L841Q	missense	0.000445534	0	0	.	.	3/4290	.	D	D	D	D	Pathogenic	Renal_tubular_acidosis,_distal,_with_hemolytic_anemia
chr15	68501974	68209636	rs796052356	C	T	CLN6	NM_017882.2	intron6	c.665+1G>A		splicing	0.000111383	0	0	.	.	.	1/102	.	.	.	D	Pathogenic	not_provided
chr15	72637803	72345462	rs28942071	G	A	HEXA	NM_000520.4	exon13	c.1510C>T	p.R504C	missense	0.000111383	0	0.0007	.	.	1/4290	.	D	D	D	A	Pathogenic/Likely_pathogenic	Tay-Sachs_disease|Gm2-gangliosidosis,_chronic|not_specified
chr15	80465431	80173089	rs80338898	C	T	FAH	NM_000137.2	exon9	c.782C>T	p.P261L	missense	0.000111383	0	0	.	.	2/4290	.	D	D	D	A	Pathogenic/Likely_pathogenic	Tyrosinemia_type_I|not_provided
chr15	89861968	89318737	rs201732356	G	A	POLG	NM_002693.2	exon21	c.3286C>T	p.R1096C	missense	0.000111383	0	6.39e-05	.	.	1/4290	.	D	P	B	D	Pathogenic/Likely_pathogenic	Progressive_sclerosing_poliodystrophy|Autosomal_dominant_progressive_external_ophthalmoplegia_with_mitochondrial_DNA_deletions_1|Sensory_ataxic_neuropathy,_dysarthria,_and_ophthalmoparesis|Mitochondrial_DNA_depletion_syndrome_4B,_MNGIE_type|Cerebellar_ataxia_infantile_with_progressive_external_ophthalmoplegia|Mitochondrial_DNA_depletion_syndrome_1_(MNGIE_type)|not_provided
chr15	90319895	89776664	rs71647808	G	T	MESP2	NM_001039958.1	exon1	c.307G>T	p.E103X	stopgain	0.000111383	0	3.19e-05	.	.	1/4290	.	.	.	.	A	Pathogenic	Spondylocostal_dysostosis_2|not_provided
chr15	91293265	90750035	rs367543013	ACT	A	BLM	NM_001287246.1	exon4	c.768_769del	p.L258Efs*7	frameshift deletion	0.000111383	0	0.0033	.	.	1/4290	.	.	.	.	.	Pathogenic/Likely_pathogenic	Bloom_syndrome
chr15	91304138	90760908	rs367543043	G	GA	BLM	NM_001287246.1	exon8	c.1536dupA	p.N515Kfs*2	frameshift insertion	0.000445534	0.000981162	6.39e-05	.	.	4/4290	.	.	.	.	.	Pathogenic	Bloom_syndrome|Hereditary_cancer-predisposing_syndrome
chr15	101438352	100898147	.	G	A	ALDH1A3	NM_000693.3	exon8	c.845G>A	p.G282E	missense	0.000111383	0.000588697	3.2e-05	1/426	.	.	.	D	D	D	D	Likely_pathogenic	not_provided
chr16	223597	173598	rs41464951	T	C	HBA2	NM_000517.4	exon3	c.427T>C	p.X143Q	stoploss	0.000445534	0.000981162	0.0002	.	.	.	1/102	.	.	.	N	Pathogenic	alpha_Thalassemia|Hemoglobin_constant_spring|Hemoglobin_H_disease,_nondeletional|not_specified|not_provided
chr16	624693	574693	rs730882240	C	T	PIGQ	NM_148920.2	exon2	c.619C>T	p.R207X	stopgain	0.000111383	0	0	.	.	1/4290	.	.	.	.	A	Pathogenic/Likely_pathogenic	Optic_atrophy|Global_developmental_delay|Intractable_seizure|EPILEPTIC_ENCEPHALOPATHY,_EARLY_INFANTILE,_77
chr16	1561138	1511137	rs559371453	A	G	IFT140	NM_014714.3	exon31	c.4196T>C	p.L1399P	missense	0.00033415	0	6.39e-05	.	.	2/4290	.	D	D	D	D	Pathogenic	Retinitis_pigmentosa_80
chr16	2546588	2496587	rs267607103	G	C	TBC1D24	NM_001199107.1	exon2	c.439G>C	p.D147H	missense	0.000111383	0.000392465	0.0002	.	.	1/4290	.	D	D	D	D	Pathogenic	Myoclonic_epilepsy,_familial_infantile
chr16	8905018	8811161	rs150719105	T	C	PMM2	NM_000303.2	exon5	c.430T>C	p.F144L	missense	0.00100245	0	3.19e-05	.	.	4/4290	.	D	B	B	D	Likely_pathogenic	Congenital_disorder_of_glycosylation,_type_Ia|not_provided
chr16	16248831	16154974	rs63750759	G	A	ABCC6	NM_001171.5	exon28	c.3940C>T	p.R1314W	missense	0.00033415	0	0.0001	.	.	3/4290	.	D	D	D	A	Pathogenic	Pseudoxanthoma_elasticum|Generalized_arterial_calcification_of_infancy_2|not_provided
chr16	16251579	16157722	rs72653749	G	A	ABCC6	NM_001171.5	exon27	c.3823C>T	p.R1275X	stopgain	0.000111383	0	0	.	.	1/4290	.	.	.	.	A	Pathogenic	Pseudoxanthoma_elasticum
chr16	16256866	16163009	rs72653744	G	A	ABCC6	NM_001171.5	exon24	c.3490C>T	p.R1164X	stopgain	0.000445534	0	0	.	.	1/4290	.	.	.	.	A	Pathogenic	Pseudoxanthoma_elasticum|not_provided
chr16	16263555	16169698	rs368465318	C	A	ABCC6	NM_001171.5	exon22	c.2943G>T	p.Q981H	missense	0.000445534	0.000784929	0.0006	.	.	1/4290	.	D	D	D	D	Pathogenic	Pseudoxanthoma_elasticum
chr16	16271422	16177565	rs72653798	A	G	ABCC6	NM_001171.5	exon19	c.2477T>C	p.L826P	missense	0.000779684	0.000392465	0.0004	2/426	.	3/4290	.	D	D	D	D	Pathogenic	Pseudoxanthoma_elasticum
chr16	16272776	16178919	rs67561842	C	T	ABCC6	NM_001171.5	exon18	c.2294G>A	p.R765Q	missense	0.000111383	0	3.19e-05	1/426	.	.	.	D	D	D	D	Pathogenic	Pseudoxanthoma_elasticum|Generalized_arterial_calcification_of_infancy_2
chr16	16272807	16178950	rs72653787	C	T	ABCC6	NM_001171.5	exon18	c.2263G>A	p.G755R	missense	0.000111383	0	0.0003	.	.	1/4290	.	D	D	D	D	Pathogenic	Pseudoxanthoma_elasticum
chr16	16276391	16182534	rs114303883	C	T	ABCC6	NM_001171.5	exon17	c.2125G>A	p.E709K	missense	0.00144798	0	0	.	.	5/4290	.	D	P	P	D	Pathogenic	Pseudoxanthoma_elasticum
chr16	16276744	16182887	rs72653780	C	T	ABCC6	NM_001171.5	exon16	c.1987G>A	p.G663S	missense	0.000222767	0.000196232	6.37e-05	.	.	1/4290	1/102	D	D	D	D	Pathogenic	Pseudoxanthoma_elasticum
chr16	16284116	16190259	rs59157279	C	T	ABCC6	NM_001171.5	exon12	c.1540G>A	p.V514I	missense	0.000111383	0.00156986	0.0003	1/426	.	.	.	T	B	B	D	Pathogenic	Pseudoxanthoma_elasticum
chr16	16313412	16219555	rs2606921	G	A	ABCC6	NM_001171.5	exon4	c.473C>T	p.A158V	missense	0.000222767	0.000392465	3.19e-05	.	.	1/4290	.	T	P	B	N	Pathogenic	Pseudoxanthoma_elasticum
chr16	21726337	21715016	rs200656442	G	A	OTOA	NM_144672.3	exon14	c.1352G>A	p.G451D	missense	0.000111383	0	0	.	.	1/4290	.	D	D	D	D	Pathogenic	Deafness,_autosomal_recessive_22
chr16	27356203	27344882	rs1805010	A	G	IL4R	NM_000418.3	exon5	c.223A>G	p.I75V	missense	0.480953	0	6.37e-05	232/426	41/84	2068/4290	40/102	T	B	B	P	Pathogenic,_protective	Acquired_immunodeficiency_syndrome,_slow_progression_to|Atopy,_resistance_to
chr16	30100451	30089130	rs202193096	G	A	TBX6	NM_004608.3	exon4	c.434C>T	p.P145L	missense	0.00300735	0	0	4/426	2/84	12/4290	.	D	D	D	D	Likely_pathogenic	Scoliosis|Spondylocostal_dysostosis_5
chr16	30764791	30753470	rs752961445	G	A	PHKG2	NM_000294.2	exon6	c.469G>A	p.E157K	missense	0.000445534	0	0	.	.	3/4290	.	D	D	D	D	Likely_pathogenic	Glycogen_storage_disease_IXc
chr16	47694459	47660548	.	C	T	PHKB	NM_000293.2	exon21	c.2014C>T	p.R672X	stopgain	0.000222767	0	6.37e-05	.	.	2/4290	.	.	.	.	A	Likely_pathogenic	not_provided
chr16	53656262	53622350	rs797045104	C	CGA	RPGRIP1L	NM_015272.3	exon23	c.3300_3301insTC	p.A1101Sfs*34	frameshift insertion	0.000779684	0	0	.	.	5/4290	.	.	.	.	.	Likely_pathogenic	Joubert_syndrome_7
chr16	56544770	56510858	rs773862084	C	A	BBS2	NM_031885.3	intron4	c.534+1G>T		splicing	0.000222767	0	0	.	.	1/4290	1/102	.	.	.	D	Pathogenic/Likely_pathogenic	Bardet-Biedl_syndrome|Bardet-Biedl_syndrome_2|Retinitis_pigmentosa_74
chr16	56899326	56865414	rs371443644	C	T	SLC12A3	NM_000339.2	exon1	c.179C>T	p.T60M	missense	0.000779684	0	3.19e-05	1/426	.	6/4290	.	D	D	D	D	Pathogenic	Familial_hypokalemia-hypomagnesemia|not_provided
chr16	56903640	56869728	rs201555148	G	A	SLC12A3	NM_000339.2	intron3	c.506-1G>A		splicing	0.000111383	0	0	1/426	.	.	.	.	.	.	D	Pathogenic	Familial_hypokalemia-hypomagnesemia|not_provided
chr16	56903674	56869762	rs146158333	C	A	SLC12A3	NM_000339.2	exon4	c.539C>A	p.T180K	missense	0.00033415	0	0	.	.	2/4290	.	D	P	B	N	Pathogenic	not_provided
chr16	70513133	70479230	rs199515460	A	C	FCSK	NM_145059.3	exon23	c.2980A>C	p.K994Q	missense	0.000891067	0	3.19e-05	.	.	6/4290	.	D	D	D	D	Pathogenic	Congenital_disorder_of_glycosylation_with_defective_fucosylation_2
chr16	70698034	70664131	rs531163149	G	A	MTSS2	NM_138383.3	exon15	c.1790C>T	p.T597M	missense	0.00167075	0	0	2/426	.	8/4290	.	D	D	D	D	Likely_pathogenic	Microcephaly|Intellectual_disability|Muscular_hypotonia|Global_developmental_delay|Iron_deposition_in_globus_pallidus
chr16	72055110	72021211	rs267606767	G	A	DHODH	NM_001361.4	exon5	c.605G>A	p.G202D	missense	0.000111383	0	0	.	.	1/4290	.	D	D	P	D	Pathogenic	Miller_syndrome
chr16	72156856	72122957	rs140352254	G	A	PMFBP1	NM_031293.2	exon19	c.2725C>T	p.R909X	stopgain	0.00189352	0.00451334	0.001	2/426	.	9/4290	1/102	.	.	.	A	Pathogenic	SPERMATOGENIC_FAILURE_31
chr16	88717415	88651007	rs104894511	G	A	CYBA	NM_000101.3	exon1	c.7C>T	p.Q3X	stopgain	0.000222767	0	9.56e-05	.	1/84	.	.	.	.	.	A	Pathogenic	Granulomatous_disease,_chronic,_autosomal_recessive,_cytochrome_b-negative
chr16	88721758	88655350	rs761991070	A	G	MVD	NM_002461.2	exon7	c.746T>C	p.F249S	missense	0.000556917	0	0	.	.	4/4290	.	D	D	D	D	Pathogenic	Porokeratosis_7,_multiple_types
chr16	88902151	88835743	rs761385192	C	T	GALNS	NM_000512.4	exon7	c.740G>A	p.G247D	missense	0.000111383	0	6.37e-05	.	.	.	1/102	T	P	P	D	Likely_pathogenic	Morquio_syndrome|not_provided
chr16	88904145	88837737	rs781439830	G	T	GALNS	NM_000512.4	exon5	c.451C>A	p.P151T	missense	0.000111383	0	3.19e-05	.	.	.	1/102	D	D	D	D	Likely_pathogenic	Mucopolysaccharidosis,_MPS-IV-A
chr16	89616953	89550545	rs72547551	C	T	SPG7	NM_003119.3	exon13	c.1715C>T	p.A572V	missense	0.000111383	0	0	.	.	.	1/102	T	D	P	D	Pathogenic/Likely_pathogenic	Spastic_paraplegia_7|not_provided
chr16	89845259	89778851	rs755104393	C	G	FANCA	NM_000135.2	intron19	c.1777-1G>C		splicing	0.000222767	0	0	.	.	1/4290	.	.	.	.	D	Likely_pathogenic	Fanconi_anemia,_complementation_group_A
chr16	89871683	89805275	rs759877008	C	T	FANCA	NM_000135.2	intron7	c.709+5G>A		splicing	0.000111383	0.0830063	0.0721	.	.	1/4290	.	.	.	.	.	Pathogenic/Likely_pathogenic	Fanconi_anemia|Fanconi_anemia,_complementation_group_A
chr17	3559997	3656703	rs113994207	G	A	CTNS	NM_001031681.2	exon9	c.589G>A	p.G197R	missense	0.000445534	0	6.37e-05	.	.	1/4290	.	D	D	D	A	Pathogenic/Likely_pathogenic	Nephropathic_cystinosis|Juvenile_nephropathic_cystinosis|Cystinosis,_ocular_nonnephropathic|not_provided
chr17	7123518	7220199	rs1057516817	T	C	ACADVL	NM_001270447.1	intron3	c.207+2T>C		splicing	0.000111383	0	0.0005	.	.	1/4290	.	.	.	.	D	Likely_pathogenic	Very_long_chain_acyl-CoA_dehydrogenase_deficiency
chr17	7127142	7223823	rs1057516519	G	A	ACADVL	NM_001270447.1	exon14	c.1349G>A	p.W450X	stopgain	0.000111383	0	0	.	.	1/4290	.	.	.	.	A	Likely_pathogenic	Very_long_chain_acyl-CoA_dehydrogenase_deficiency
chr17	7127303	7223984	rs118204016	G	A	ACADVL	NM_001270447.1	exon15	c.1418G>A	p.R473H	missense	0.000111383	0	3.18e-05	1/426	.	.	.	D	D	D	A	Pathogenic/Likely_pathogenic	Rhabdomyolysis|Abnormality_of_circulating_enzyme_level|Very_long_chain_acyl-CoA_dehydrogenase_deficiency|not_provided
chr17	7980043	8076725	rs397514527	G	A	ALOX12B	NM_001139.2	exon10	c.1294C>T	p.R432X	stopgain	0.000111383	0.0155024	0.0062	.	.	1/4290	.	.	.	.	A	Pathogenic/Likely_pathogenic	Autosomal_recessive_congenital_ichthyosis_2|not_provided
chr17	8013507	8110189	.	T	C	ALOXE3	NM_001165960.1	exon10	c.1604A>G	p.H535R	missense	0.000445534	0	0	.	.	2/4290	.	D	D	D	D	Likely_pathogenic	Autosomal_recessive_congenital_ichthyosis_2
chr17	8018941	8115623	rs370031870	G	A	ALOXE3	NM_001165960.1	exon4	c.814C>T	p.R272X	stopgain	0.000111383	0	0	1/426	.	.	.	.	.	.	A	Pathogenic	Ichthyosis|Autosomal_recessive_congenital_ichthyosis_3
chr17	10443244	10539927	rs1057518398	C	A	MYH2	NM_017534.5	intron12	c.1147+1G>T		splicing	0.000111383	0	0	1/426	.	.	.	.	.	.	D	Likely_pathogenic	not_provided
chr17	16843698	16940384	rs769165409	A	AT	TNFRSF13B	NM_012452.2	exon4	c.572dupA	p.D191Efs*46	frameshift insertion	0.000111383	0.000392465	3.19e-05	.	.	.	1/102	.	.	.	.	Pathogenic	Common_variable_immunodeficiency_2
chr17	18025637	18122323	rs766187994	C	CA	MYO15A	NM_016239.3	exon2	c.3524dupA	p.S1176Vfs*14	frameshift insertion	0.000222767	0	0	.	.	2/4290	.	.	.	.	.	Pathogenic	Deafness,_autosomal_recessive_3
chr17	19247109	19343796	rs369488112	G	A	B9D1	NM_015681.5	exon6	c.466C>T	p.R156W	missense	0.000222767	0	3.19e-05	.	.	1/4290	.	D	D	D	D	Pathogenic	Joubert_syndrome
chr17	19284408	19381095	rs147296805	G	A	MAPK7	NM_139033.2	exon4	c.886G>A	p.A296T	missense	0.00757407	0	0	1/426	.	37/4290	1/102	T	D	P	D	Pathogenic	Scoliosis,_isolated,_susceptibility_to,_1
chr17	19285376	19382063	rs758163506	C	T	MAPK7	NM_139033.2	exon5	c.1760C>T	p.P587L	missense	0.000111383	0	0	1/426	.	.	.	T	B	B	N	Pathogenic	Scoliosis,_isolated,_susceptibility_to,_1
chr17	19561059	19657746	rs72547566	C	T	ALDH3A2	NM_001031806.1	exon5	c.682C>T	p.R228C	missense	0.000111383	0	0	.	.	1/4290	.	D	D	D	D	Likely_pathogenic	Sj枚gren-Larsson_syndrome
chr17	19568310	19664997	rs72547575	A	G	ALDH3A2	NM_001031806.1	exon8	c.1157A>G	p.N386S	missense	0.000445534	0.000588697	0.0002	.	.	3/4290	.	D	D	D	A	Pathogenic/Likely_pathogenic	Sj枚gren-Larsson_syndrome|not_provided
chr17	27580801	29253783	rs775038545	G	A	CRYBA1	NM_005208.4	intron5	c.500+1G>A		splicing	0.00033415	0.00431711	0.0005	1/426	.	.	.	.	.	.	D	Likely_pathogenic	Cataract,_congenital_zonular,_with_sutural_opacities
chr17	29325923	30998905	rs724159978	AG	A	RNF135	NM_032322.3	exon5	c.1014delG	p.V339Sfs*42	frameshift deletion	0.00245043	0.000588697	6.37e-05	.	.	11/4290	.	.	.	.	.	Pathogenic	Autism_spectrum_disorder|Macrocephaly,_macrosomia,_facial_dysmorphism_syndrome
chr17	29556173	31229155	rs199474747	T	C	NF1	NM_001042492.2	exon21	c.2540T>C	p.L847P	missense	0.000111383	0	0	.	.	1/4290	.	D	D	D	D	Pathogenic/Likely_pathogenic	Hereditary_cancer-predisposing_syndrome|Neurofibromatosis,_type_1|Midaortic_syndrome|not_specified|not_provided
chr17	33434458	35107439	rs753862052	T	TTA	RAD51D	NM_001142571.1	exon4	c.331_332insTA	p.K111Ifs*13	frameshift insertion	0.000445534	0	6.37e-05	.	.	3/4290	.	.	.	.	.	Pathogenic/Likely_pathogenic	Hereditary_cancer-predisposing_syndrome|Breast-ovarian_cancer,_familial_4|not_provided
chr17	33902991	35575972	rs398123301	AAG	A	PEX12	NM_000286.2	exon3	c.888_889del	p.L297Tfs*12	frameshift deletion	0.000111383	0.000196232	0.0002	.	.	1/4290	.	.	.	.	.	Pathogenic	Peroxisome_biogenesis_disorders,_Zellweger_syndrome_spectrum|Infantile_Refsum's_disease|Peroxisome_biogenesis_disorder_3A|not_provided
chr17	38907213	40750961	rs766783183	A	G	KRT25	NM_181534.3	exon5	c.950T>C	p.L317P	missense	0.000111383	0	3.24e-05	1/426	.	.	.	D	D	D	D	Pathogenic	Hypotrichosis_8|Autosomal_recessive_woolly_hair_3
chr17	40001630	41845378	rs370756367	G	A	KLHL10	NM_152467.3	exon3	c.937G>A	p.A313T	missense	0.00033415	0	0	.	.	2/4290	.	T	B	B	D	Pathogenic	Spermatogenic_failure_11
chr17	41063017	42911000	rs80356484	G	T	G6PC	NM_000151.3	exon5	c.648G>T	p.L216L	synonymous	0.00100245	0	6.38e-05	1/426	.	4/4290	.	.	.	.	.	Pathogenic/Likely_pathogenic	Glycogen_storage_disease_type_1A|not_provided
chr17	42457372	44380004	rs137852906	G	A	ITGA2B	NM_000419.3	exon17	c.1750C>T	p.R584X	stopgain	0.000111383	0.000196232	6.52e-05	.	.	1/4290	.	.	.	.	A	Pathogenic	Glanzmann_thrombasthenia
chr17	45364434	47287068	rs749261962	A	G	ITGB3	NM_000212.2	intron6	c.778-2A>G		splicing	0.000556917	0	3.18e-05	.	.	3/4290	.	.	.	.	D	Likely_pathogenic	Glanzmann_thrombasthenia
chr17	46023253	47945887	rs796052872	ACTGC	A	PNPO	NM_018129.3	exon5	c.445_448del	p.P150Rfs*27	frameshift deletion	0.00033415	0.00117739	6.37e-05	.	.	2/4290	.	.	.	.	.	Pathogenic/Likely_pathogenic	Pyridoxal_5'-phosphate-dependent_epilepsy|not_provided
chr17	48247606	50170245	rs137852623	C	T	SGCA	NM_000023.2	exon7	c.850C>T	p.R284C	missense	0.000111383	0	0	1/426	.	.	.	D	D	D	D	Pathogenic/Likely_pathogenic	Sarcoglycanopathies|Limb-girdle_muscular_dystrophy,_type_2D|not_provided
chr17	48269187	50191826	rs72651642	G	A	COL1A1	NM_000088.3	exon31	c.2089C>T	p.R697X	stopgain	0.000111383	0	0	1/426	.	.	.	.	.	.	A	Pathogenic	Infantile_cortical_hyperostosis|Osteogenesis_imperfecta_type_I|Postmenopausal_osteoporosis|Osteogenesis_imperfecta,_recessive_perinatal_lethal|Osteogenesis_imperfecta_type_III|Osteogenesis_imperfecta_with_normal_sclerae,_dominant_form|Ehlers-Danlos_syndrome,_procollagen_proteinase_deficient|not_provided
chr17	56283904	58206543	rs762668200	T	TC	MKS1	NM_017777.3	exon16	c.1411dupG	p.E471Gfs*120	frameshift insertion	0.00033415	0	0	.	.	1/4290	.	.	.	.	.	Pathogenic	Joubert_syndrome|Meckel-Gruber_syndrome|Meckel_syndrome_type_1
chr17	59820496	61743135	rs1064793887	C	T	BRIP1	NM_032043.2	intron15	c.2258-1G>A		splicing	0.000111383	0.000196232	0	.	.	1/4290	.	.	.	.	D	Likely_pathogenic	Ovarian_Neoplasms|Familial_cancer_of_breast|Hereditary_cancer-predisposing_syndrome|Fanconi_anemia,_complementation_group_J|not_provided
chr17	59886112	61808751	rs779466229	CA	C	BRIP1	NM_032043.2	exon7	c.633delT	p.G212Afs*62	frameshift deletion	0.000111383	0.000196232	9.55e-05	.	.	1/4290	.	.	.	.	.	Pathogenic	Familial_cancer_of_breast|Hereditary_cancer-predisposing_syndrome|Fanconi_anemia,_complementation_group_J|not_provided
chr17	72860347	74864225	rs760030067	G	A	FDXR	NM_001258012.3	exon9	c.1054C>T	p.R352X	stopgain	0.000111383	0	3.19e-05	.	.	1/4290	.	.	.	.	A	Likely_pathogenic	not_provided
chr17	73836398	75840317	rs121434352	G	A	UNC13D	NM_199242.2	exon10	c.766C>T	p.R256X	stopgain	0.000111383	0	0	.	.	1/4290	.	.	.	.	A	Pathogenic	Hemophagocytic_lymphohistiocytosis,_familial,_3|not_provided
chr17	76120262	78124181	rs769471844	T	A	TMC6	NM_001127198.1	intron8	c.892-2A>T		splicing	0.000222767	0	6.37e-05	1/426	.	1/4290	.	.	.	.	D	Likely_pathogenic	EPIDERMODYSPLASIA_VERRUCIFORMIS,_SUSCEPTIBILITY_TO,_1
chr17	76991292	78995210	rs773215035	C	T	CANT1	NM_138793.3	exon3	c.643G>A	p.E215K	missense	0.000111383	0	0	.	.	1/4290	.	D	D	D	D	Likely_pathogenic	not_provided
chr17	78090815	80117016	rs1800312	G	C	GAA	NM_000152.3	exon16	c.2238G>C	p.W746C	missense	0.000445534	0	6.37e-05	.	.	2/4290	.	D	D	D	D	Pathogenic/Likely_pathogenic	Glycogen_storage_disease|Glycogen_storage_disease,_type_II|not_specified|not_provided
chr17	78092118	80118319	rs780321415	C	T	GAA	NM_000152.3	exon18	c.2608C>T	p.R870X	stopgain	0.000111383	0	0	.	.	1/4290	.	.	.	.	A	Pathogenic/Likely_pathogenic	Glycogen_storage_disease,_type_II|not_provided
chr17	78187645	80213846	rs753472891	C	T	SGSH	NM_000199.3	exon6	c.703G>A	p.D235N	missense	0.00033415	0	0	.	.	1/4290	.	D	D	D	D	Pathogenic/Likely_pathogenic	Mucopolysaccharidosis,_MPS-III-A
chr17	78358945	80385145	rs112735431	G	A	RNF213	NM_001256071.2	exon60	c.14429G>A	p.R4810K	missense	0.0006683	0	0	.	.	5/4290	.	T	P	B	N	Pathogenic	Moyamoya_disease_2
chr17	79892256	81934380	rs281875319	C	T	PYCR1	NM_001282281.1	exon7	c.824G>A	p.G275E	missense	0.000445534	0	0	.	.	1/4290	.	D	D	P	D	Pathogenic	Autosomal_recessive_cutis_laxa_type_3B|not_provided
chr18	3457570	3457572	rs121909068	A	G	TGIF1	NM_170695.3	exon3	c.838A>G	p.T280A	missense	0.000111383	0.00196232	0.0004	1/426	.	.	.	T	B	B	A	Pathogenic	Holoprosencephaly_4
chr18	20548818	22968855	rs373804633	C	T	RBBP8	NM_002894.2	exon5	c.298C>T	p.R100W	missense	0.000222767	0	0	.	.	2/4290	.	D	D	D	D	Pathogenic	Seckel_syndrome_2
chr18	21114444	23534480	rs200444084	C	T	NPC1	NM_000271.4	exon23	c.3557G>A	p.R1186H	missense	0.000111383	0	0	.	1/84	.	.	D	D	D	D	Pathogenic/Likely_pathogenic	Niemann-Pick_disease_type_C1|not_provided
chr18	28970675	31390712	rs267606775	T	C	DSG4	NM_001134453.1	exon6	c.574T>C	p.S192P	missense	0.00033415	0	0	.	.	2/4290	.	D	D	D	D	Pathogenic	Hypotrichosis_6
chr18	44102147	46522184	rs961865375	G	A	LOXHD1	NM_144612.6	exon32	c.5002C>T	p.R1668X	stopgain	0.000111383	0	0	1/426	.	.	.	.	.	.	A	Pathogenic/Likely_pathogenic	Deafness,_autosomal_recessive_77|not_provided|Rare_genetic_deafness
chr18	50866178	53339808	rs775565634	G	A	DCC	NM_005215.3	exon15	c.2260G>A	p.V754M	missense	0.00122522	0.000196232	3.19e-05	2/426	.	5/4290	.	T	B	B	D	Pathogenic	Corpus_callosum_agenesis
chr18	58039087	60371854	rs942758928	C	T	MC4R	NM_005912.2	exon1	c.496G>A	p.V166I	missense	0.00033415	0.000196232	6.38e-05	1/426	.	1/4290	.	D	P	B	D	Pathogenic	Obesity
chr18	59810539	62143306	rs587777187	C	T	PIGN	NM_176787.4	exon11	c.963G>A	p.Q321Q	synonymous	0.00033415	0	0	.	.	1/4290	.	.	.	.	.	Pathogenic	Multiple_congenital_anomalies-hypotonia-seizures_syndrome_1
chr18	61465904	63798670	rs672601344	C	CT	SERPINB7	NM_003784.3	exon6	c.522dupT	p.V175Cfs*46	frameshift insertion	0.00423257	0	3.18e-05	1/426	.	20/4290	2/102	.	.	.	.	Pathogenic	Palmoplantar_keratoderma,_nagashima_type|not_provided
chr18	61471522	63804288	rs142859678	C	T	SERPINB7	NM_003784.3	exon8	c.796C>T	p.R266X	stopgain	0.011918	0	3.18e-05	5/426	1/84	56/4290	1/102	.	.	.	D	Pathogenic	Palmoplantar_keratoderma,_nagashima_type|not_provided
chr19	1802540	1802541	rs568761860	G	A	ATP8B3	NM_138813.3	exon11	c.1009C>T	p.R337X	stopgain	0.000111383	0	0.4468	1/426	.	.	.	.	.	.	A	Likely_pathogenic	not_provided
chr19	5896463	5896452	rs1057517914	C	T	NDUFA11	NM_001193375.1	intron3	c.313+1G>A		splicing	0.000111383	0	0	.	.	1/4290	.	.	.	.	D	Likely_pathogenic	not_provided
chr19	11213441	11102765	rs750474121	G	A	LDLR	NM_000527.4	exon3	c.292G>A	p.G98S	missense	0.000556917	0	0	.	.	2/4290	.	D	B	B	D	Likely_pathogenic	Familial_hypercholesterolemia_1
chr19	11217357	11106681	rs749220643	G	A	LDLR	NM_000527.4	exon5	c.811G>A	p.V271I	missense	0.000445534	0	3.19e-05	1/426	.	3/4290	.	T	B	B	N	Likely_pathogenic	Familial_hypercholesterolemia_1
chr19	11323851	11213175	rs772543889	C	T	DOCK6	NM_020812.3	intron35	c.4491+1G>A		splicing	0.000222767	0	0.0003	1/426	1/84	.	.	.	.	.	D	Pathogenic	not_provided
chr19	13007120	12896306	rs754312389	C	T	GCDH	NM_000159.3	exon8	c.737C>T	p.S246L	missense	0.000111383	0.302786	0.2037	.	.	1/4290	.	D	D	B	D	Likely_pathogenic	Glutaric_aciduria,_type_1
chr19	13007763	12896949	rs761765983	G	A	GCDH	NM_000159.3	exon9	c.892G>A	p.A298T	missense	0.000222767	0	0	.	.	2/4290	.	T	D	P	D	Pathogenic	Glutaric_aciduria,_type_1|not_provided
chr19	13008220	12897406	rs768925619	G	A	GCDH	NM_000159.3	exon10	c.1060G>A	p.G354S	missense	0.000111383	0	6.37e-05	.	.	1/4290	.	D	D	D	D	Likely_pathogenic	Glutaric_aciduria,_type_1
chr19	13008224	12897410	rs748275416	G	A	GCDH	NM_000159.3	exon10	c.1064G>A	p.R355H	missense	0.000222767	0	0	.	.	1/4290	.	D	D	P	D	Pathogenic	Glutaric_aciduria,_type_1
chr19	15296182	15185371	rs1057519101	G	A	NOTCH3	NM_000435.2	exon14	c.2182C>T	p.R728C	missense	0.000111383	0	0	.	.	1/4290	.	D	D	D	D	Likely_pathogenic	not_provided
chr19	15298126	15187315	rs201118034	G	A	NOTCH3	NM_000435.2	exon11	c.1630C>T	p.R544C	missense	0.00100245	0	3.18e-05	1/426	.	4/4290	.	T	P	P	D	Pathogenic/Likely_pathogenic	Lehman_syndrome|Infantile_myofibromatosis_2|Cerebral_autosomal_dominant_arteriopathy_with_subcortical_infarcts_and_leukoencephalopathy_type_1|not_provided
chr19	15648391	15537580	rs776275777	G	A	CYP4F22	NM_173483.3	exon6	c.467G>A	p.R156H	missense	0.000111383	0	0	.	.	1/4290	.	D	D	D	D	Pathogenic	Autosomal_recessive_congenital_ichthyosis_5
chr19	15651317	15540506	rs118203937	G	A	CYP4F22	NM_173483.3	exon8	c.728G>A	p.R243H	missense	0.000111383	0.000196232	0	.	.	1/4290	.	D	D	D	A	Pathogenic	Autosomal_recessive_congenital_ichthyosis_5
chr19	33892768	33401862	rs121917721	C	T	PEPD	NM_000285.3	exon12	c.826G>A	p.D276N	missense	0.000111383	0	0	.	.	1/4290	.	D	D	D	A	Pathogenic	Prolidase_deficiency|not_provided
chr19	35617757	35126853	rs779232987	C	T	LGI4	NM_139284.2	exon7	c.793G>A	p.A265T	missense	0.000111383	0	0	.	.	1/4290	.	D	D	B	N	Pathogenic	Arthrogryposis_multiplex_congenita,_neurogenic,_with_myelin_defect
chr19	36339606	35848704	rs386833867	G	A	NPHS1	NM_004646.3	exon9	c.1103C>T	p.P368L	missense	0.000111383	0	0	.	.	1/4290	.	D	D	D	D	Likely_pathogenic	Finnish_congenital_nephrotic_syndrome
chr19	36574124	36083222	rs387907083	G	A	WDR62	NM_001083961.1	exon11	c.1531G>A	p.D511N	missense	0.000111383	0.000784929	0.0004	.	.	1/4290	.	D	P	B	D	Pathogenic	Primary_autosomal_recessive_microcephaly_2
chr19	38897643	38407003	rs201037487	C	T	FAM98C	NM_174905.3	exon7	c.844C>T	p.R282X	stopgain	0.000445534	0	3.19e-05	.	.	4/4290	.	.	.	.	A	Likely_pathogenic	Short-rib_thoracic_dysplasia_3_with_or_without_polydactyly
chr19	38945968	38455328	rs118192119	G	A	RYR1	NM_000540.2	exon14	c.1534G>A	p.E512K	missense	0.000111383	0	0	.	.	1/4290	.	T	D	D	D	Pathogenic	Myopathy,_Central_Core|not_provided
chr19	39907506	39416866	rs201201843	C	T	PLEKHG2	NM_022835.2	exon7	c.610C>T	p.R204W	missense	0.0006683	0	0.0009	1/426	.	3/4290	.	D	D	D	D	Pathogenic	Leukodystrophy_and_acquired_microcephaly_with_or_without_dystonia
chr19	40902869	40396962	rs574861276	G	A	PRX	NM_181882.2	exon7	c.1390C>T	p.R464X	stopgain	0.000111383	0	0	.	.	1/4290	.	.	.	.	D	Pathogenic	Charcot-Marie-Tooth_disease_type_4
chr19	45208901	44705631	rs746164064	C	T	CEACAM16	NM_001039213.3	exon5	c.703C>T	p.R235C	missense	0.000111383	0	0	.	.	1/4290	.	D	D	P	D	Pathogenic	Nonsyndromic_hearing_loss_and_deafness
chr19	45412041	44908784	rs121918397	G	A	APOE	NM_001302688.1	exon4	c.566G>A	p.R189H	missense	0.000111383	0	0	1/426	.	.	.	T	P	B	N	Pathogenic	Familial_type_3_hyperlipoproteinemia
chr19	48339518	47836261	rs771450991	G	A	CRX	NM_000554.4	exon3	c.119G>A	p.R40Q	missense	0.000111383	0	0	.	.	1/4290	.	D	D	D	D	Likely_pathogenic	Retinal_dystrophy
chr19	49206817	48703560	rs1800028	C	T	FUT2	NM_000511.5	exon2	c.604C>T	p.R202X	stopgain	0.00456672	0	0	2/426	.	18/4290	1/102	.	.	.	A	Pathogenic	Vitamin_b12_plasma_level_quantitative_trait_locus_1
chr19	51294940	50791683	rs202073531	C	T	ACP4	NM_033068.3	exon4	c.331C>T	p.R111C	missense	0.00033415	0.000196232	0	.	.	1/4290	.	D	D	D	D	Pathogenic	Amelogenesis_imperfecta,_type_IJ
chr19	51295037	50791780	rs546603773	C	T	ACP4	NM_033068.3	exon4	c.428C>T	p.T143M	missense	0.000222767	0	3.19e-05	.	.	1/4290	.	D	D	D	D	Pathogenic	Amelogenesis_imperfecta,_type_IJ
chr19	51856529	51353275	rs548046212	C	T	ETFB	NM_001014763.1	exon2	c.505G>A	p.A169T	missense	0.000111383	0	0	.	.	1/4290	.	D	D	D	D	Likely_pathogenic	not_provided
chr2	20212184	20012423	rs104893640	C	T	MATN3	NM_002381.4	exon1	c.209G>A	p.R70H	missense	0.00311874	0	0	.	.	13/4290	.	T	P	B	A	Pathogenic	Multiple_epiphyseal_dysplasia_5|Multiple_Epiphyseal_Dysplasia,_Dominant
chr2	21232203	21009331	rs146538280	G	A	APOB	NM_000384.2	exon26	c.7537C>T	p.R2513X	stopgain	0.000111383	0	0.0002	.	.	1/4290	.	.	.	.	A	Pathogenic	Familial_hypercholesterolemia_2|Hypobetalipoproteinemia,_familial,_1
chr2	26705384	26482516	rs80356585	G	T	OTOF	NM_194248.2	exon14	c.1469C>A	p.P490Q	missense	0.000111383	0.000392465	3.18e-05	.	.	1/4290	.	D	D	D	A	Pathogenic	Deafness,_autosomal_recessive_9
chr2	27720201	27497334	rs375836361	C	T	GCKR	NM_001486.3	exon2	c.151C>T	p.R51X	stopgain	0.000111383	0.000392465	0	.	.	1/4290	.	.	.	.	A	Likely_pathogenic	not_provided
chr2	27721143	27498276	rs146175795	G	A	GCKR	NM_001486.3	exon4	c.307G>A	p.V103M	missense	0.00634885	0.000196232	3.19e-05	4/426	1/84	28/4290	.	D	D	D	D	Likely_pathogenic	Fasting_plasma_glucose_level_quantitative_trait_locus_5
chr2	31751294	31526224	rs9332967	C	T	SRD5A2	NM_000348.3	exon5	c.737G>A	p.R246Q	missense	0.000556917	0	0	.	.	1/4290	.	.	D	P	.	Pathogenic	3-Oxo-5_alpha-steroid_delta_4-dehydrogenase_deficiency
chr2	31754468	31529398	rs9332961	C	T	SRD5A2	NM_000348.3	exon4	c.607G>A	p.G203S	missense	0.000556917	0	0	1/426	.	1/4290	1/102	.	D	D	.	Pathogenic	3-Oxo-5_alpha-steroid_delta_4-dehydrogenase_deficiency
chr2	31805954	31580885	rs9332960	G	A	SRD5A2	NM_000348.3	exon1	c.16C>T	p.Q6X	stopgain	0.000445534	0	0.0002	.	.	2/4290	.	.	.	.	.	Pathogenic	3-Oxo-5_alpha-steroid_delta_4-dehydrogenase_deficiency|not_provided
chr2	38298328	38071185	rs56010818	C	T	CYP1B1	NM_000104.3	exon3	c.1169G>A	p.R390H	missense	0.0006683	0.000588697	0.0008	.	.	4/4290	.	.	D	D	D	Pathogenic	not_provided
chr2	38301838	38074695	rs104893628	C	G	CYP1B1	NM_000104.3	exon2	c.694G>C	p.G232R	missense	0.000111383	0.000196232	3.19e-05	1/426	.	.	.	.	D	D	A	Pathogenic	Glaucoma_3,_primary_congenital,_A
chr2	44050063	43822924	rs199689137	G	A	ABCG5	NM_022436.2	exon10	c.1336C>T	p.R446X	stopgain	0.00111383	0	0	3/426	.	3/4290	1/102	.	.	.	A	Pathogenic	Sitosterolemia|SITOSTEROLEMIA_2
chr2	44051210	43824071	rs119480069	C	T	ABCG5	NM_022436.2	exon9	c.1166G>A	p.R389H	missense	0.00144798	0.000392465	3.19e-05	.	1/84	8/4290	.	T	D	D	A	Pathogenic	SITOSTEROLEMIA_2
chr2	44528214	44301075	.	C	G	SLC3A1	NM_000341.3	exon6	c.1084C>G	p.R362G	missense	0.000222767	0	0.0003	.	.	2/4290	.	D	D	D	D	Pathogenic	Cystine_urolithiasis
chr2	44531479	44304340	rs758627758	T	A	SLC3A1	NM_000341.3	intron7	c.1332+2T>A		splicing	0.000222767	0	0	.	.	2/4290	.	.	.	.	D	Pathogenic	Cystine_urolithiasis
chr2	47177629	46950490	rs886037747	TTATC	T	TTC7A	NM_001288951.1	exon2	c.313_316del	p.Y105*	stopgain	0.000111383	0	0.0003	.	.	1/4290	.	.	.	.	.	Pathogenic	Multiple_gastrointestinal_atresias
chr2	47709916	47482777	.	A	G	MSH2	NM_000251.2	intron15	c.2635-2A>G		splicing	0.000111383	0.121664	0.113	1/426	.	.	.	.	.	.	D	Likely_pathogenic	Lynch_syndrome_I
chr2	49216161	48989022	rs121909659	A	G	FSHR	NM_000145.3	exon6	c.479T>C	p.I160T	missense	0.000222767	0	0	.	.	2/4290	.	D	B	P	A	Likely_pathogenic	Ovarian_dysgenesis_1|not_provided
chr2	58453867	58226732	rs869320684	AG	A	FANCL	NM_001114636.1	exon4	c.268delC	p.L90Ffs*6	frameshift deletion	0.000111383	0.000196232	3.18e-05	.	.	1/4290	.	.	.	.	.	Pathogenic	Fanconi_anemia,_complementation_group_L
chr2	61258969	61031834	rs553968959	C	T	PEX13	NM_002618.3	exon2	c.508C>T	p.R170X	stopgain	0.000111383	0	6.37e-05	.	.	1/4290	.	.	.	.	A	Pathogenic	Peroxisome_biogenesis_disorder_11A
chr2	71743313	71516183	.	CTT	C	DYSF	NM_001130987.1	exon9	c.893_894del	p.F299Lfs*5	frameshift deletion	0.000111383	0.000392465	9.55e-05	.	.	1/4290	.	.	.	.	.	Pathogenic	Dysferlinopathy
chr2	71797407	71570277	rs750028300	T	C	DYSF	NM_001130987.1	exon28	c.3028T>C	p.W1010R	missense	0.000111383	0	6.37e-05	1/426	.	.	.	D	D	D	D	Pathogenic/Likely_pathogenic	Myopathy,_distal,_with_anterior_tibial_onset|Miyoshi_muscular_dystrophy_1|Limb-girdle_muscular_dystrophy,_type_2B
chr2	73635852	73408724	rs150825781	C	T	ALMS1	NM_015120.4	exon2	c.427C>T	p.Q143X	stopgain	0.000222767	0	0	1/426	.	1/4290	.	.	.	.	A	Pathogenic/Likely_pathogenic	Alstrom_syndrome
chr2	73718234	73491107	.	ACT	A	ALMS1	NM_015120.4	exon10	c.9149_9150del	p.C3052Sfs*9	frameshift deletion	0.000111383	0	0	.	.	1/4290	.	.	.	.	.	Likely_pathogenic	Alstrom_syndrome
chr2	73800116	73572989	rs398122992	GAGGTCTAATCAAATTAAAA	G	ALMS1	NM_015120.4	exon16	c.11113_11131del	p.R3705Lfs*11	frameshift deletion	0.000111383	0	3.18e-05	.	.	1/4290	.	.	.	.	.	Pathogenic	Alstrom_syndrome|not_provided
chr2	110881472	110123895	rs760619900	C	G	NPHP1	NM_000272.3	exon20	c.2098G>C	p.G700R	missense	0.000111383	0.000196232	0	.	.	1/4290	.	D	D	D	D	Likely_pathogenic	not_provided
chr2	128185950	127428374	rs121918154	C	T	PROC	NM_000312.3	exon9	c.814C>T	p.R272C	missense	0.000111383	0	3.19e-05	.	.	1/4290	.	.	D	D	A	Likely_pathogenic	Thromboembolism|Thrombophilia,_hereditary,_due_to_protein_C_deficiency,_autosomal_dominant
chr2	128186025	127428449	rs199469471	G	C	PROC	NM_000312.3	exon9	c.889G>C	p.D297H	missense	0.00033415	0	0	.	.	3/4290	.	.	D	D	D	Pathogenic	Thrombophilia,_hereditary,_due_to_protein_C_deficiency,_autosomal_dominant
chr2	136678161	135920591	rs369152939	G	A	DARS	NM_001349.3	exon10	c.821C>T	p.A274V	missense	0.000111383	0	6.37e-05	.	.	1/4290	.	D	D	D	D	Pathogenic	Hypomyelination_with_brainstem_and_spinal_cord_involvement_and_leg_spasticity
chr2	160982927	160126416	rs730880297	G	A	ITGB6	NM_000888.4	exon11	c.1846C>T	p.R616X	stopgain	0.000111383	0	3.19e-05	.	.	1/4290	.	.	.	.	A	Pathogenic	Amelogenesis_imperfecta,_type_IH
chr2	163137845	162281335	.	A	T	IFIH1	NM_022168.3	exon7	c.1517T>A	p.I506N	missense	0.000222767	0	0	.	.	1/4290	.	D	D	D	D	Likely_pathogenic	Aicardi-Goutieres_syndrome_7
chr2	167141295	166284785	rs1057518900	G	A	SCN9A	NM_002977.3	exon12	c.1642C>T	p.R548X	stopgain	0.000111383	0	3.19e-05	.	.	1/4290	.	.	.	.	A	Pathogenic	Pain_insensitivity|Generalized_epilepsy_with_febrile_seizures_plus,_type_7|Hereditary_sensory_and_autonomic_neuropathy_type_IIA
chr2	167168008	166311498	rs755067851	C	T	SCN9A	NM_002977.3	intron2	c.258+1G>A		splicing	0.000779684	0.000196232	0	.	.	3/4290	.	.	.	.	D	Likely_pathogenic	Generalized_epilepsy_with_febrile_seizures_plus,_type_7|Hereditary_sensory_and_autonomic_neuropathy_type_IIA
chr2	178562132	177697404	rs769235876	GAGGAC	G	PDE11A	NM_016953.3	exon15	c.2268_2272del	p.S757Qfs*4	frameshift deletion	0.00233905	0	3.2e-05	1/426	.	12/4290	.	.	.	.	.	Likely_pathogenic	Pigmented_nodular_adrenocortical_disease,_primary,_2
chr2	178592878	177728150	rs771254375	G	C	PDE11A	NM_016953.3	exon11	c.1811C>G	p.S604X	stopgain	0.000222767	0.00156986	0.0006	1/426	.	1/4290	.	.	.	.	A	Likely_pathogenic	Pigmented_nodular_adrenocortical_disease,_primary,_2
chr2	179667000	178802273	rs139517732	C	T	TTN	NM_001267550.2	exon3	c.160G>A	p.V54M	missense	0.00144798	0	0	1/426	.	5/4290	.	T	P	B	A	Pathogenic	Dilated_cardiomyopathy_1G
chr2	197777663	196912939	rs587777378	TAAG	T	PGAP1	NM_024989.3	exon4	c.589_591del	p.L197del	nonframeshift deletion	0.000222767	0	0	.	.	2/4290	.	.	.	.	.	Pathogenic	Mental_retardation,_autosomal_recessive_42
chr2	202141631	201276908	rs17860424	C	T	CASP8	NM_001080125.1	exon7	c.919C>T	p.R307W	missense	0.000111383	0	0	1/426	.	.	.	D	D	D	A	Pathogenic	Caspase-8_deficiency
chr2	203384865	202520142	rs200948870	G	A	BMPR2	NM_001204.6	exon7	c.908G>A	p.R303H	missense	0.000222767	0	0	.	1/84	1/4290	.	T	D	P	D	Pathogenic	Primary_pulmonary_hypertension
chr2	209027941	208163217	rs139353014	C	T	CRYGA	NM_014617.3	exon2	c.239G>A	p.R80H	missense	0.000222767	0	0	.	.	2/4290	.	T	P	B	D	Pathogenic	Congenital_cataract
chr2	210783340	209918616	rs869025316	C	T	UNC80	NM_032504.1	exon32	c.5098C>T	p.P1700S	missense	0.000111383	0.00117739	3.19e-05	.	1/84	.	.	D	D	D	D	Likely_pathogenic	Hypotonia,_infantile,_with_psychomotor_retardation_and_characteristic_facies_2
chr2	211476856	210612132	rs201716417	C	G	CPS1	NM_001122633.2	exon21	c.2407C>G	p.R803G	missense	0.00033415	0	0	.	.	1/4290	.	D	D	D	D	Likely_pathogenic	Congenital_hyperammonemia,_type_I
chr2	212537981	211673256	rs535202189	C	T	ERBB4	NM_005235.2	exon14	c.1624G>A	p.E542K	missense	0.00100245	0	0	.	.	5/4290	.	T	B	B	D	Likely_pathogenic	Cutaneous_melanoma
chr2	215646005	214781281	rs876660761	GC	G	BARD1	NM_000465.3	exon4	c.592delG	p.A198Lfs*14	frameshift deletion	0.000111383	0	3.19e-05	.	.	1/4290	.	.	.	.	.	Pathogenic	Hereditary_cancer-predisposing_syndrome
chr2	215646150	214781426	rs730881411	G	A	BARD1	NM_000465.3	exon4	c.448C>T	p.R150X	stopgain	0.000111383	0	0.0002	.	.	1/4290	.	.	.	.	A	Pathogenic	Familial_cancer_of_breast|Hereditary_cancer-predisposing_syndrome|not_provided
chr2	217315650	216450927	rs119473037	C	T	SMARCAL1	NM_014140.3	exon12	c.1933C>T	p.R645C	missense	0.000111383	0	9.56e-05	.	.	1/4290	.	D	D	D	A	Pathogenic	Schimke_immunoosseous_dysplasia
chr2	219679182	218814459	rs397515355	G	A	CYP27A1	NM_000784.3	intron7	c.1263+1G>A		splicing	0.00033415	0	3.19e-05	.	.	1/4290	.	.	.	.	D	Pathogenic	Cholestanol_storage_disease|not_provided
chr2	219679419	218814696	rs200883871	G	C	CYP27A1	NM_000784.3	exon8	c.1415G>C	p.G472A	missense	0.00211628	0	0	1/426	1/84	10/4290	.	D	D	D	D	Pathogenic	Cholestanol_storage_disease
chr2	228119375	227254659	rs1085307063	C	CT	COL4A3	NM_000091.4	exon15	c.833dupT	p.P279Afs*8	frameshift insertion	0.000111383	0	6.38e-05	1/426	.	.	.	.	.	.	.	Likely_pathogenic	Benign_familial_hematuria|Alport_syndrome_3,_autosomal_dominant|Alport_syndrome,_autosomal_recessive
chr2	228131805	227267089	.	G	A	COL4A3	NM_000091.4	intron23	c.1504+1G>A		splicing	0.000111383	0	6.38e-05	.	.	1/4290	.	.	.	.	D	Pathogenic	not_provided
chr2	228175529	227310813	rs752452590	T	G	COL4A3	NM_000091.4	exon51	c.4793T>G	p.L1598R	missense	0.000556917	0	0	1/426	.	2/4290	.	D	D	D	D	Pathogenic/Likely_pathogenic	Alport_syndrome,_autosomal_recessive|not_provided
chr2	228563469	227698753	.	G	A	SLC19A3	NM_025243.3	exon3	c.962C>T	p.A321V	missense	0.000111383	0	6.38e-05	.	.	1/4290	.	D	D	D	D	Pathogenic	Biotin-thiamine-responsive_basal_ganglia_disease
chr2	233349182	232484472	rs765430577	C	T	ECEL1	NM_004826.3	exon6	c.1184G>A	p.R395Q	missense	0.000111383	0	3.19e-05	.	.	1/4290	.	T	P	B	D	Pathogenic	Distal_arthrogryposis_type_5D
chr2	238402172	237493529	rs119473031	C	T	MLPH	NM_024101.6	exon2	c.103C>T	p.R35W	missense	0.000111383	0	0.0002	.	.	.	1/102	D	D	D	A	Pathogenic	Griscelli_syndrome_type_3
chr2	241808284	240868867	rs138584408	T	C	AGXT	NM_000030.2	exon1	c.2T>C	p.M1?	startloss	0.00033415	0	0	.	.	1/4290	.	D	D	P	A	Pathogenic/Likely_pathogenic	Primary_hyperoxaluria,_type_I
chr2	241808307	240868890	rs398122322	A	AC	AGXT	NM_000030.2	exon1	c.26dupC	p.K12Qfs*156	frameshift insertion	0.0006683	0	0	1/426	.	4/4290	.	.	.	.	.	Pathogenic	Primary_hyperoxaluria|Primary_hyperoxaluria,_type_I|not_provided
chr2	241808314	240868897	rs34116584	C	G	AGXT	NM_000030.2	exon1	c.32C>G	p.P11R	missense	0.00211628	0	9.56e-05	.	.	13/4290	.	D	D	D	D	Likely_pathogenic	Primary_hyperoxaluria,_type_I
chr2	241817545	240878128	rs180177156	G	A	AGXT	NM_000030.2	exon10	c.1049G>A	p.G350D	missense	0.000111383	0	0	1/426	.	.	.	D	D	D	A	Likely_pathogenic	Primary_hyperoxaluria,_type_I
chr20	2398069	2417423	rs201964784	G	C	TGM6	NM_198994.2	exon10	c.1528G>C	p.D510H	missense	0.00256182	0	0	.	.	9/4290	1/102	D	D	D	D	Pathogenic	Spinocerebellar_ataxia_35
chr20	2411130	2430484	rs793888526	AAAG	A	TGM6	NM_198994.2	exon11	c.1718_1720del	p.E574del	nonframeshift deletion	0.000111383	0	0	.	.	1/4290	.	.	.	.	.	Pathogenic	Spinocerebellar_ataxia_35
chr20	4680404	4699758	rs74315408	G	A	PRNP	NM_000311.3	exon2	c.538G>A	p.V180I	missense	0.000779684	0	0	1/426	.	2/4290	.	D	P	P	A	Pathogenic/Likely_pathogenic	Jakob-Creutzfeldt_disease|Genetic_prion_diseases
chr20	18491519	18510875	rs121918222	C	T	SEC23B	NM_032985.4	exon2	c.40C>T	p.R14W	missense	0.000222767	0	0	.	1/84	.	.	D	D	P	A	Pathogenic	Congenital_dyserythropoietic_anemia,_type_II|Cowden_syndrome_7|not_provided
chr20	18505624	18524980	rs121918226	C	T	SEC23B	NM_032985.4	exon6	c.649C>T	p.R217X	stopgain	0.000111383	0.000196232	9.56e-05	.	.	1/4290	.	.	.	.	A	Pathogenic	Congenital_dyserythropoietic_anemia,_type_II|not_provided
chr20	18523722	18543078	rs398124225	C	T	SEC23B	NM_032985.4	exon14	c.1571C>T	p.A524V	missense	0.000111383	0.000196232	3.18e-05	1/426	.	.	.	D	D	P	D	Pathogenic	not_provided
chr20	23030292	23049655	rs16984852	C	A	THBD	NM_000361.2	UTR5	c.-151G>T		UTR5	0.00679439	0	0	5/426	1/84	22/4290	.	.	.	.	.	Pathogenic	Thrombophilia_due_to_thrombomodulin_defect
chr20	31573658	32985852	rs886041024	C	T	SUN5	NM_080675.3	exon11	c.781G>A	p.V261M	missense	0.000222767	0	3.24e-05	.	.	1/4290	.	D	D	D	D	Pathogenic	Spermatogenic_failure_16
chr20	31585452	32997646	rs781693813	CT	C	SUN5	NM_080675.3	exon6	c.381delA	p.V128Sfs*7	frameshift deletion	0.000556917	0	6.37e-05	.	.	2/4290	2/102	.	.	.	.	Pathogenic	Spermatogenic_failure_16
chr20	43047140	44418500	rs202105574	G	A	HNF4A	NM_000457.4	exon6	c.724G>A	p.V242M	missense	0.000111383	0	3.19e-05	.	.	1/4290	.	T	D	P	D	Likely_pathogenic	not_provided
chr20	43251546	44622905	rs79281338	C	T	ADA	NM_000022.2	exon8	c.704G>A	p.R235Q	missense	0.000111383	0.000196232	3.19e-05	.	.	1/4290	.	D	D	D	D	Pathogenic/Likely_pathogenic	Severe_combined_immunodeficiency_due_to_ADA_deficiency
chr20	43252916	44624275	.	AC	A	ADA	NM_000022.2	exon6	c.532delG	p.V178*	stopgain	0.000111383	0.000784929	0.0004	.	.	1/4290	.	.	.	.	.	Likely_pathogenic	Severe_combined_immunodeficiency_due_to_ADA_deficiency
chr20	57599434	59024379	rs121918555	C	T	TUBB1	NM_030773.3	exon4	c.952C>T	p.R318W	missense	0.00033415	0	6.38e-05	.	.	2/4290	.	D	D	D	A	Likely_pathogenic	Macrothrombocytopenia|MACROTHROMBOCYTOPENIA,_AUTOSOMAL_DOMINANT,_TUBB1-RELATED
chr20	61584207	62952855	rs548728088	C	T	SLC17A9	NM_022082.3	exon1	c.25C>T	p.R9C	missense	0.00323012	0.000196232	0.0001	2/426	1/84	17/4290	.	D	P	B	D	Pathogenic	Porokeratosis_8,_disseminated_superficial_actinic_type
chr20	61596505	62965153	rs606231251	G	A	SLC17A9	NM_022082.3	exon9	c.932G>A	p.R311Q	missense	0.000111383	0	0	.	.	1/4290	.	D	D	D	D	Pathogenic	Porokeratosis_8,_disseminated_superficial_actinic_type
chr20	62324564	63693211	rs398123017	C	T	RTEL1	NM_001283009.1	exon30	c.2920C>T	p.R974X	stopgain	0.000111383	0.000784929	0.0031	.	.	1/4290	.	.	.	.	A	Pathogenic	Dyskeratosis_congenita|Idiopathic_fibrosing_alveolitis,_chronic_form|Dyskeratosis_congenita,_autosomal_recessive,_5|Pulmonary_fibrosis_and/or_bone_marrow_failure,_telomere-related,_3
chr21	27264120	25891808	rs201269325	C	T	APP	NM_000484.3	exon17	c.2125G>A	p.G709S	missense	0.000111383	0	6.37e-05	.	.	1/4290	.	D	D	D	D	Likely_pathogenic	Hereditary_cerebral_hemorrhage_with_amyloidosis|Cerebral_amyloid_angiopathy,_APP-related
chr21	35742982	34370683	rs542835031	G	A	KCNE2	NM_172201.1	exon2	c.205G>A	p.V69M	missense	0.00033415	0	9.56e-05	.	.	3/4290	.	D	D	D	D	Likely_pathogenic	not_provided
chr21	43802210	42382101	rs181949335	C	T	TMPRSS3	NM_024022.2	exon9	c.916G>A	p.A306T	missense	0.00033415	0	0	.	.	2/4290	.	D	D	D	D	Pathogenic	Deafness,_autosomal_recessive_8|not_provided|Rare_genetic_deafness
chr21	43808612	42388503	rs200090033	C	T	TMPRSS3	NM_024022.2	exon5	c.346G>A	p.V116M	missense	0.000222767	0	0	.	.	2/4290	.	D	D	D	D	Likely_pathogenic	not_provided
chr21	43809044	42388935	rs139805921	G	A	TMPRSS3	NM_024022.2	exon4	c.316C>T	p.R106C	missense	0.000111383	0	0	1/426	.	.	.	D	D	D	D	Likely_pathogenic	not_provided
chr21	43897396	42477286	rs200382776	C	T	RSPH1	NM_080860.3	intron7	c.727+5G>A		splicing	0.00100245	0	0.0002	.	.	5/4290	.	.	.	.	.	Likely_pathogenic	Primary_ciliary_dyskinesia|Kartagener_syndrome
chr21	45707419	44287536	rs746101086	G	GC	AIRE	NM_000383.3	exon4	c.484dupC	p.K164Qfs*53	frameshift insertion	0.00033415	0	0	.	1/84	.	.	.	.	.	.	Pathogenic	Polyglandular_autoimmune_syndrome,_type_1
chr21	45708342	44288459	rs199612115	G	T	AIRE	NM_000383.3	intron5	c.652+1G>T		splicing	0.0020049	0	0	.	.	7/4290	1/102	.	.	.	D	Likely_pathogenic	Polyglandular_autoimmune_syndrome,_type_1
chr21	45709686	44289803	rs138489664	G	A	AIRE	NM_000383.3	intron6	c.798+1G>A		splicing	0.000111383	0	6.37e-05	.	.	1/4290	.	.	.	.	D	Likely_pathogenic	Polyglandular_autoimmune_syndrome,_type_1
chr22	17690428	17209538	rs200930463	C	G	ADA2	NM_001282225.2	exon2	c.140G>C	p.G47A	missense	0.000111383	0	0	.	.	1/4290	.	T	D	D	D	Pathogenic	Polyarteritis_nodosa,_childhoood-onset
chr22	18562701	18079935	rs62641228	C	T	PEX26	NM_001127649.2	exon2	c.292C>T	p.R98W	missense	0.000111383	0	0	.	.	.	1/102	D	D	D	A	Pathogenic	Peroxisome_biogenesis_disorders,_Zellweger_syndrome_spectrum|Peroxisome_biogenesis_disorder_7B|Peroxisome_biogenesis_disorder_7A|not_provided
chr22	21346527	20992238	rs149850248	C	T	LZTR1	NM_006767.3	exon10	c.1018C>T	p.R340X	stopgain	0.000111383	0.000196232	0.0002	.	.	1/4290	.	.	.	.	A	Likely_pathogenic	not_provided
chr22	21349277	20994988	rs148677674	C	T	LZTR1	NM_006767.3	exon16	c.1904C>T	p.P635L	missense	0.000111383	0	6.37e-05	1/426	.	.	.	D	D	P	D	Likely_pathogenic	Noonan_syndrome_10
chr22	38121765	37725758	rs118204030	C	T	TRIOBP	NM_001039141.2	exon7	c.3202C>T	p.R1068X	stopgain	0.000111383	0.000196232	0.0002	.	.	1/4290	.	.	.	.	A	Pathogenic	Deafness,_autosomal_recessive_28
chr22	38512189	38116182	rs776713955	C	T	PLA2G6	NM_003560.2	exon13	c.1772G>A	p.R591Q	missense	0.000111383	0	9.56e-05	.	.	1/4290	.	D	D	D	D	Pathogenic	Infantile_neuroaxonal_dystrophy
chr22	38528924	38132917	rs199935023	C	A	PLA2G6	NM_003560.2	exon7	c.991G>T	p.D331Y	missense	0.000445534	0	0.0002	.	.	2/4290	.	D	D	D	D	Pathogenic	Parkinson_disease_14|not_provided
chr22	38565226	38169219	rs886039552	G	A	PLA2G6	NM_003560.2	exon2	c.208C>T	p.R70X	stopgain	0.000111383	0	0	.	.	1/4290	.	D	.	.	A	Pathogenic	not_provided
chr22	50893287	50454858	rs200488568	T	C	SBF1	NM_002972.3	exon35	c.4768A>G	p.T1590A	missense	0.00167075	0	3.19e-05	5/426	.	9/4290	.	T	B	B	D	Likely_pathogenic	Charcot-Marie-Tooth_disease,_type_4B3|not_provided
chr22	50903513	50465084	rs587776986	T	C	SBF1	NM_002972.3	exon12	c.1249A>G	p.M417V	missense	0.00167075	0.000196232	6.37e-05	3/426	.	8/4290	.	T	B	B	N	Pathogenic	Charcot-Marie-Tooth_disease,_type_4B3
chr22	50962306	50523877	rs780314255	G	A	SCO2	NM_001169109.1	exon2	c.535C>T	p.R179C	missense	0.000222767	0.000196232	0	.	.	1/4290	.	D	D	D	D	Likely_pathogenic	not_provided
chr22	51019072	50580643	rs757369551	TG	T	CHKB	NM_005198.4	exon5	c.598delC	p.Q200Rfs*11	frameshift deletion	0.000222767	0	0	.	.	.	1/102	.	.	.	.	Pathogenic	Muscular_dystrophy,_congenital,_megaconial_type
chr22	51064623	50626195	rs199476382	C	T	ARSA	NM_000487.5	exon5	c.938G>A	p.R313Q	missense	0.000111383	0	6.37e-05	.	.	1/4290	.	D	D	D	D	Likely_pathogenic	Metachromatic_leukodystrophy|not_provided
chr22	51065757	50627329	rs74315455	C	A	ARSA	NM_000487.5	exon2	c.302G>T	p.G101V	missense	0.00033415	0	0	.	.	2/4290	.	D	D	D	D	Pathogenic	Metachromatic_leukodystrophy|not_provided
chr3	9970024	9928340	rs773852926	C	T	IL17RC	NM_153461.3	exon11	c.1126C>T	p.R376X	stopgain	0.000111383	0	3.2e-05	.	.	1/4290	.	.	.	.	A	Pathogenic	Candidiasis,_familial,_9
chr3	10331457	10289773	rs696217	G	T	GHRL	NM_016362.4	exon4	c.214C>A	p.L72M	missense	0.201604	0.000196232	0	86/426	9/84	863/4290	18/102	T	D	D	P	Pathogenic,_risk_factor	Metabolic_syndrome,_susceptibility_to|Obesity,_age_at_onset_of
chr3	12558126	12516627	rs113994149	A	G	TSEN2	NM_025265.3	exon7	c.926A>G	p.Y309C	missense	0.000222767	0	0	1/426	.	.	.	D	D	D	A	Pathogenic	Pontocerebellar_hypoplasia_type_2B
chr3	15512081	15470574	rs770045897	G	A	COLQ	NM_005677.3	exon11	c.679C>T	p.R227X	stopgain	0.000111383	0	0.0001	.	.	1/4290	.	.	.	.	A	Pathogenic	Endplate_acetylcholinesterase_deficiency|not_provided
chr3	15643400	15601893	rs143058480	A	T	BTD	NM_001281726.2	exon1	c.43A>T	p.R15X	stopgain	0.000111383	0	0	.	.	1/4290	.	.	.	.	A	Likely_pathogenic	Biotinidase_deficiency
chr3	15686853	15645346	rs397514425	C	CT	BTD	NM_001281723.1	exon4	c.1431dupT	p.L478Ffs*13	frameshift insertion	0.000445534	0	6.37e-05	.	.	3/4290	.	.	.	.	.	Pathogenic	Biotinidase_deficiency
chr3	25777619	25736128	rs757712371	T	C	NGLY1	NM_018297.3	exon7	c.1025A>G	p.Y342C	missense	0.000556917	0	0	.	.	4/4290	.	D	D	D	D	Likely_pathogenic	Congenital_disorder_of_deglycosylation
chr3	30686237	30644745	rs779131465	A	G	TGFBR2	NM_001024847.2	intron3	c.170-2A>G		splicing	0.000111383	0	3.2e-05	1/426	.	.	.	.	.	.	D	Pathogenic	Loeys-Dietz_syndrome_2
chr3	38592237	38550746	.	C	CCAT	SCN5A	NM_198056.2	exon28	c.5625_5626insATG	p.M1875_E1876insM	nonframeshift insertion	0.000111383	0	6.37e-05	.	.	1/4290	.	.	.	.	.	Likely_pathogenic	not_provided
chr3	39172565	39131074	.	TG	T	TTC21A	NM_145755.2	exon19	c.2563delG	p.V855*	stopgain	0.000111383	0	0	.	.	1/4290	.	.	.	.	.	Pathogenic	SPERMATOGENIC_FAILURE_37
chr3	46021220	45979728	rs141476300	G	A	FYCO1	NM_024513.3	exon4	c.265C>T	p.R89C	missense	0.000111383	0	0	.	.	1/4290	.	D	D	D	D	Likely_pathogenic	not_provided
chr3	47451774	47410284	rs138076291	C	T	PTPN23	NM_015466.3	exon20	c.2486C>T	p.P829L	missense	0.000111383	0	0	1/426	.	.	.	D	B	B	N	Likely_pathogenic	Global_developmental_delay|Brain_atrophy
chr3	47453171	47411681	rs751809435	GAGA	G	PTPN23	NM_015466.3	exon20	c.3884_3886del	p.K1296del	nonframeshift deletion	0.0006683	0.000196232	0.0001	.	.	4/4290	.	.	.	.	.	Likely_pathogenic	Global_developmental_delay|Brain_atrophy
chr3	48604124	48566691	.	AC	A	COL7A1	NM_000094.3	exon111	c.8272delG	p.V2758Sfs*28	frameshift deletion	0.000111383	0	9.55e-05	.	.	1/4290	.	.	.	.	.	Pathogenic	not_provided
chr3	48630534	48593101	rs775288140	C	T	COL7A1	NM_000094.3	intron5	c.682+1G>A		splicing	0.000111383	0.000196232	0	.	.	1/4290	.	.	.	.	D	Pathogenic/Likely_pathogenic	Recessive_dystrophic_epidermolysis_bullosa|not_provided
chr3	48921567	48884134	rs541208710	A	C	SLC25A20	NM_000387.5	intron3	c.199-10T>G		splicing	0.00122522	0	0	.	.	6/4290	.	.	.	.	.	Pathogenic	Carnitine_acylcarnitine_translocase_deficiency|not_provided
chr3	49137403	49099970	rs775652214	CCT	C	QARS	NM_005051.2	exon14	c.1284_1285del	p.D430Qfs*16	frameshift deletion	0.000111383	0	0	.	.	1/4290	.	.	.	.	.	Pathogenic	Microcephaly,_progressive,_with_seizures_and_cerebral_and_cerebellar_atrophy
chr3	49548187	49510754	rs189360006	G	A	DAG1	NM_001165928.3	exon5	c.220G>A	p.V74I	missense	0.000891067	0	3.19e-05	.	.	2/4290	.	D	B	B	N	Pathogenic	Limb-girdle_muscular_dystrophy-dystroglycanopathy,_type_C9
chr3	52427030	52393014	rs759646845	CAGAG	C	DNAH1	NM_015512.4	exon65	c.10464_10467del	p.R3490Qfs*4	frameshift deletion	0.000111383	0	3.19e-05	.	.	1/4290	.	.	.	.	.	Pathogenic	SPERMATOGENIC_FAILURE_18|Ciliary_dyskinesia,_primary,_37
chr3	52430998	52396982	rs779490893	CCT	C	DNAH1	NM_015512.4	exon73	c.11726_11727del	p.P3909Rfs*33	frameshift deletion	0.0006683	0	3.18e-05	1/426	.	4/4290	.	.	.	.	.	Pathogenic	SPERMATOGENIC_FAILURE_18
chr3	58517450	58531723	rs150832314	G	A	ACOX2	NM_003500.3	exon6	c.673C>T	p.R225W	missense	0.00033415	0	0	.	.	2/4290	.	D	D	D	D	Pathogenic	Bile_acid_synthesis_defect,_congenital,_6
chr3	93611869	93893025	rs387906674	G	A	PROS1	NM_000313.3	exon10	c.1063C>T	p.R355C	missense	0.000222767	0	0	.	.	1/4290	.	D	D	D	D	Pathogenic	Protein_S_deficiency
chr3	121508959	121790112	rs727503968	G	A	IQCB1	NM_001023570.2	exon11	c.1090C>T	p.R364X	stopgain	0.000111383	0.0174647	0.0057	.	.	1/4290	.	.	.	.	A	Pathogenic	Nephronophthisis|not_provided
chr3	121712212	121993365	rs775062249	G	A	ILDR1	NM_001199799.1	exon7	c.1384C>T	p.R462X	stopgain	0.000111383	0	6.37e-05	1/426	.	.	.	.	.	.	A	Pathogenic	Deafness,_autosomal_recessive_42
chr3	123457797	123738950	rs761508149	G	A	MYLK	NM_053025.3	exon7	c.535C>T	p.R179X	stopgain	0.000222767	0	0	1/426	.	.	.	.	.	.	A	Likely_pathogenic	not_provided
chr3	132384674	132665830	rs532178791	A	G	UBA5	NM_024818.3	exon2	c.169A>G	p.M57V	startloss	0.0013366	0	3.19e-05	.	.	3/4290	1/102	D	P	P	D	Pathogenic	Epileptic_encephalopathy,_early_infantile,_44
chr3	132438644	132719800	rs771742823	G	A	NPHP3	NM_153240.4	exon2	c.424C>T	p.R142X	stopgain	0.00033415	0.000196232	3.18e-05	.	.	1/4290	.	.	.	.	A	Pathogenic	Adolescent_nephronophthisis
chr3	133667736	133948892	rs765249238	C	T	SLCO2A1	NM_005630.2	intron7	c.940+1G>A		splicing	0.000222767	0	0	.	.	2/4290	.	.	.	.	D	Pathogenic	Primary_hypertrophic_osteoarthropathy,_autosomal_recessive_2
chr3	135975424	136256582	rs753981900	C	T	PCCB	NM_001178014.1	exon3	c.331C>T	p.R111X	stopgain	0.000111383	0	0	.	.	1/4290	.	.	.	.	A	Likely_pathogenic	Propionyl-CoA_carboxylase_deficiency
chr3	136046480	136327638	rs121964961	A	G	PCCB	NM_001178014.1	exon14	c.1364A>G	p.Y455C	missense	0.000111383	0.000196232	3.19e-05	1/426	.	.	.	D	D	D	A	Pathogenic/Likely_pathogenic	Propionyl-CoA_carboxylase_deficiency
chr3	148459667	148741880	rs104893677	C	T	AGTR1	NM_031850.3	exon4	c.950C>T	p.T317M	missense	0.000111383	0	0	.	.	1/4290	.	D	D	D	A	Pathogenic	Renal_dysplasia
chr3	148876599	149158812	rs755083879	C	G	HPS3	NM_032383.4	exon10	c.1838C>G	p.S613X	stopgain	0.000779684	0	0	.	.	5/4290	.	.	.	.	A	Pathogenic	not_provided
chr3	158364700	158646911	.	TG	T	GFM1	NM_024996.5	exon4	c.537delG	p.G180Afs*11	frameshift deletion	0.000445534	0	0	.	.	2/4290	1/102	.	.	.	.	Pathogenic	not_provided
chr3	165547582	165829794	rs745364489	G	A	BCHE	NM_000055.2	exon2	c.1240C>T	p.R414C	missense	0.00189352	0	3.19e-05	.	.	7/4290	.	D	D	D	D	Likely_pathogenic	Deficiency_of_butyrylcholine_esterase
chr3	165547794	165830006	rs754214624	G	GT	BCHE	NM_000055.2	exon2	c.1027dupA	p.T343Nfs*8	frameshift insertion	0.00033415	0	0	.	.	1/4290	.	.	.	.	.	Likely_pathogenic	Deficiency_of_butyrylcholine_esterase
chr3	165548383	165830595	rs760182781	G	A	BCHE	NM_000055.2	exon2	c.439C>T	p.Q147X	stopgain	0.000111383	0.000196232	9.56e-05	1/426	.	.	.	.	.	.	A	Likely_pathogenic	Deficiency_of_butyrylcholine_esterase
chr3	182788996	183071208	rs199914879	A	T	MCCC1	NM_020166.4	intron6	c.639+2T>A		splicing	0.000222767	0	3.19e-05	.	.	1/4290	1/102	.	.	.	D	Pathogenic	3_Methylcrotonyl-CoA_carboxylase_1_deficiency
chr3	185237074	185519286	rs201868115	G	T	LIPH	NM_139248.2	exon6	c.742C>A	p.H248N	missense	0.00111383	0.0164835	0.002	.	1/84	1/4290	.	D	D	D	D	Pathogenic	Woolly_hair,_autosomal_recessive_2,_with_or_without_hypotrichosis
chr3	185237080	185519292	rs201249971	A	T	LIPH	NM_139248.2	exon6	c.736T>A	p.C246S	missense	0.000222767	0	0.0003	.	.	1/4290	.	D	D	D	D	Pathogenic/Likely_pathogenic	Hypotrichosis_7|Hereditary_hypotrichosis_simplex|Woolly_hair,_autosomal_recessive_2,_with_or_without_hypotrichosis
chr3	186386811	186669022	rs761776963	C	T	HRG	NM_000412.4	exon2	c.271C>T	p.P91S	missense	0.000891067	0	0	.	.	3/4290	.	T	D	P	N	Pathogenic/Likely_pathogenic	Familial_early-onset_deep_venous_thrombosis|Thrombophilia,_histidine-rich_glycoprotein-related
chr3	190120217	190402428	rs765256758	C	T	CLDN16	NM_006580.3	exon2	c.416C>T	p.A139V	missense	0.000111383	0	0	1/426	.	.	.	D	D	P	D	Pathogenic	Primary_hypomagnesemia
chr4	980874	987086	rs753767675	T	C	IDUA	NM_000203.4	exon1	c.2T>C	p.M1?	startloss	0.000779684	0	9.56e-05	.	.	6/4290	.	D	B	B	D	Pathogenic	Mucopolysaccharidosis_type_I
chr4	996540	1002752	.	G	T	IDUA	NM_000203.4	exon9	c.1210G>T	p.E404X	stopgain	0.000111383	0.000392465	0.0002	.	.	1/4290	.	.	.	.	A	Pathogenic	Mucopolysaccharidosis_type_I|Hurler_syndrome
chr4	3487272	3485545	rs118203994	G	C	DOK7	NM_001301071.1	exon5	c.539G>C	p.G180A	missense	0.000222767	0	3.19e-05	.	.	1/4290	.	D	P	P	A	Pathogenic	Myasthenia,_limb-girdle,_familial
chr4	4862084	4860357	rs104893854	C	A	MSX1	NM_002448.3	exon1	c.458C>A	p.P153Q	missense	0.00033415	0	3.19e-05	.	.	1/4290	1/102	D	P	B	A	Pathogenic	Orofacial_cleft_5
chr4	5642516	5640789	rs137852924	G	A	EVC2	NM_147127.4	exon10	c.1195C>T	p.R399X	stopgain	0.00033415	0	0	.	1/84	1/4290	.	.	.	.	A	Pathogenic	Ellis-van_Creveld_syndrome|Short_rib-polydactyly_syndrome,_Majewski_type|Curry-Hall_syndrome|not_provided
chr4	5696060	5694333	rs781096099	A	G	EVC2	NM_147127.4	intron3	c.450+2T>C		splicing	0.000222767	0.000196232	9.55e-05	.	.	1/4290	.	.	.	.	D	Likely_pathogenic	Ellis-van_Creveld_syndrome|Curry-Hall_syndrome
chr4	5810001	5808274	rs121908424	C	T	EVC	NM_153717.2	exon18	c.2635C>T	p.Q879X	stopgain	0.000222767	0.000196232	3.19e-05	.	.	1/4290	.	.	.	.	A	Pathogenic	Ellis-van_Creveld_syndrome
chr4	6279306	6277579	rs71530923	C	T	WFS1	NM_006005.3	exon2	c.124C>T	p.R42X	stopgain	0.000111383	0	0	.	.	1/4290	.	.	.	.	A	Pathogenic/Likely_pathogenic	WFS1-Related_Disorders|Wolfram-like_syndrome,_autosomal_dominant|Diabetes_mellitus_AND_insipidus_with_optic_atrophy_AND_deafness|not_provided
chr4	8603221	8601494	rs375633720	C	T	CPZ	NM_001014447.2	exon3	c.493C>T	p.R165W	missense	0.000111383	0.000196232	0	.	.	1/4290	.	D	D	D	D	Likely_pathogenic	Short_stature
chr4	15562230	15560607	rs773881370	A	T	CC2D2A	NM_001080522.2	exon24	c.2999A>T	p.E1000V	missense	0.000222767	0.000196232	3.19e-05	.	.	2/4290	.	D	P	B	D	Pathogenic	Joubert_syndrome_9
chr4	15589553	15587930	rs886044295	G	A	CC2D2A	NM_001080522.2	intron33	c.4179+1G>A		splicing	0.000111383	0	6.37e-05	.	.	1/4290	.	.	.	.	D	Pathogenic	not_provided
chr4	16077390	16075767	rs747512450	TG	T	PROM1	NM_006017.2	exon2	c.139delC	p.H47Ifs*12	frameshift deletion	0.000445534	0	0.0001	.	.	3/4290	.	.	.	.	.	Pathogenic	Leber_congenital_amaurosis_1
chr4	24801834	24800212	rs1799895	C	G	SOD3	NM_003102.2	exon2	c.691C>G	p.R231G	missense	0.0132546	0	0	10/426	1/84	53/4290	3/102	D	B	B	A	Pathogenic	Superoxide_dismutase,_elevated_extracellular
chr4	47951883	47949866	rs749012133	AG	A	CNGA1	NM_001142564.1	exon5	c.472delC	p.L158Ffs*4	frameshift deletion	0.00211628	0	0	.	1/84	9/4290	.	.	.	.	.	Pathogenic	Retinitis_pigmentosa_49|not_provided
chr4	65175614	64309896	rs773204795	C	T	TECRL	NM_001010874.4	exon6	c.587G>A	p.R196Q	missense	0.000111383	0	0	.	.	1/4290	.	D	D	D	N	Likely_pathogenic	Long_QT_syndrome|Ventricular_tachycardia,_catecholaminergic_polymorphic,_3
chr4	84205686	83284533	rs778094136	T	C	COQ2	NM_015697.7	exon1	c.382A>G	p.M128V	missense	0.000445534	0	0	.	.	2/4290	.	T	B	B	D	Pathogenic,_risk_factor	Shy-Drager_syndrome|Coenzyme_Q10_deficiency,_primary
chr4	88959640	88038488	.	C	T	PKD2	NM_000297.3	exon4	c.1081C>T	p.R361X	stopgain	0.000111383	0.000196232	0	.	.	1/4290	.	.	.	.	A	Pathogenic	Polycystic_kidney_disease_2|not_provided
chr4	88989098	88067946	rs778235410	C	T	PKD2	NM_000297.3	exon13	c.2407C>T	p.R803X	stopgain	0.000111383	0	0	.	.	1/4290	.	.	.	.	A	Pathogenic	Polycystic_kidney_disease_2
chr4	104579371	103658214	rs760022956	C	T	TACR3	NM_001059.2	intron2	c.737+1G>A		splicing	0.000111383	0.000196232	0	.	.	1/4290	.	.	.	.	D	Pathogenic	Hypogonadotropic_hypogonadism_11_with_or_without_anosmia
chr4	113506711	112585555	rs76187047	C	T	ZGRF1	NM_018392.4	exon14	c.4087G>A	p.E1363K	missense	0.0455558	0	0.0002	23/426	.	181/4290	4/102	D	P	B	D	Likely_pathogenic	Speech-language_disorder_1
chr4	113544993	112623837	rs61745597	G	T	ZGRF1	NM_018392.4	exon4	c.142C>A	p.L48M	missense	0.0461127	0.190542	0.1407	23/426	.	187/4290	5/102	T	B	B	N	Likely_pathogenic	Speech-language_disorder_1
chr4	119652616	118731461	.	C	T	SEC24D	NM_014822.2	exon21	c.2723G>A	p.C908Y	missense	0.000111383	0.000392465	0	.	.	1/4290	.	D	D	D	D	Pathogenic	Cole-Carpenter_syndrome_2
chr4	120192573	119271418	.	C	T	USP53	NM_019050.2	exon15	c.1558C>T	p.R520X	stopgain	0.000445534	0	3.19e-05	1/426	.	1/4290	.	.	.	.	A	Pathogenic	Cholestasis
chr4	123160763	122239608	.	G	A	KIAA1109	NM_015312.3	exon27	c.3926G>A	p.R1309Q	missense	0.000111383	0	3.19e-05	.	.	1/4290	.	D	D	D	D	Likely_pathogenic	Fetal_akinesia_sequence|Arthrogryposis_multiplex_congenita
chr4	128842794	127921639	rs267607235	G	A	MFSD8	NM_152778.2	exon12	c.1235C>T	p.P412L	missense	0.000111383	0	0	.	.	1/4290	.	D	D	D	D	Likely_pathogenic	Seizures|Ceroid_lipofuscinosis_neuronal_7
chr4	159603421	158682269	rs121964954	G	A	ETFDH	NM_004453.3	exon3	c.250G>A	p.A84T	missense	0.000445534	0	0	1/426	.	3/4290	.	D	D	D	A	Pathogenic	Glutaric_aciduria,_type_2|Glutaric_acidemia_IIC|not_provided
chr4	159603466	158682314	rs371493232	C	T	ETFDH	NM_004453.3	exon3	c.295C>T	p.R99C	missense	0.00033415	0	0	.	.	2/4290	.	D	D	D	D	Pathogenic	Glutaric_aciduria,_type_2
chr4	159606289	158685137	rs121964955	G	A	ETFDH	NM_004453.3	exon5	c.524G>A	p.R175H	missense	0.000111383	0	0.0001	.	.	.	1/102	D	D	D	D	Pathogenic	Glutaric_acidemia_IIC
chr4	159616734	158695582	rs780015493	A	G	ETFDH	NM_004453.3	exon7	c.770A>G	p.Y257C	missense	0.0006683	0	6.37e-05	1/426	.	2/4290	.	D	D	D	D	Pathogenic	Glutaric_aciduria,_type_2
chr4	159618808	158697656	rs796051958	A	G	ETFDH	NM_004453.3	exon8	c.929A>G	p.Y310C	missense	0.000222767	0	0	.	.	1/4290	.	D	D	D	D	Pathogenic	not_provided
chr4	175439134	174517983	rs587777719	CAG	C	HPGD	NM_000860.5	exon3	c.310_311del	p.L104Afs*3	frameshift deletion	0.0013366	0	0	1/426	2/84	5/4290	.	.	.	.	.	Pathogenic	HPGD-Related_Disorders|Hypertrophic_osteoarthropathy,_primary,_autosomal_recessive,_1
chr4	187115692	186194538	rs199476186	C	T	CYP4V2	NM_207352.3	exon2	c.253C>T	p.R85C	missense	0.000111383	0	9.56e-05	.	.	1/4290	.	D	P	B	A	Pathogenic	Bietti_crystalline_corneoretinal_dystrophy
chr4	187126358	186205204	rs199476197	A	C	CYP4V2	NM_207352.3	exon8	c.992A>C	p.H331P	missense	0.00189352	0	0	1/426	.	8/4290	.	D	D	D	A	Pathogenic	Bietti_crystalline_corneoretinal_dystrophy|not_provided
chr4	187130017	186208863	rs199476183	A	G	CYP4V2	NM_207352.3	intron8	c.1091-2A>G		splicing	0.000779684	0	0.0001	.	.	3/4290	.	.	.	.	A	Pathogenic	Bietti_crystalline_corneoretinal_dystrophy
chr4	187197453	186276299	rs281875245	G	T	F11	NM_000128.3	exon7	c.664G>T	p.D222Y	missense	0.000222767	0	0.0002	.	.	1/4290	.	D	D	D	D	Likely_pathogenic	Hereditary_factor_XI_deficiency_disease|not_provided
chr4	187201251	186280097	rs770505620	C	T	F11	NM_000128.3	exon8	c.841C>T	p.Q281X	stopgain	0.000222767	0	0	.	.	1/4290	.	.	.	.	A	Pathogenic	Hereditary_factor_XI_deficiency_disease|not_provided
chr4	187205398	186284244	rs753909969	G	A	F11	NM_000128.3	exon11	c.1288G>A	p.A430T	missense	0.000111383	0	0	.	.	1/4290	.	D	D	D	D	Pathogenic	Hereditary_factor_XI_deficiency_disease|not_provided
chr4	187207644	186286490	rs201007090	G	A	F11	NM_000128.3	exon13	c.1556G>A	p.W519X	stopgain	0.000222767	0	0	.	.	2/4290	.	.	.	.	A	Pathogenic/Likely_pathogenic	Abnormal_bleeding|Hereditary_factor_XI_deficiency_disease
chr4	187630125	186708971	rs201488687	T	C	FAT1	NM_005245.3	exon2	c.857A>G	p.N286S	missense	0.000222767	0	0	.	.	1/4290	.	T	B	B	D	Likely_pathogenic	Nephrotic_syndrome
chr5	233681	233566	rs771328239	C	T	SDHA	NM_004168.3	exon8	c.985C>T	p.R329X	stopgain	0.000111383	0	0	.	1/84	.	.	.	.	.	A	Pathogenic	Hereditary_cancer-predisposing_syndrome|Mitochondrial_complex_II_deficiency|Paragangliomas_5
chr5	1216900	1216785	rs35329108	G	A	SLC6A19	NM_001003841.2	intron8	c.1017-4G>A		splicing	0.137558	0.000196232	3.19e-05	42/426	14/84	594/4290	10/102	.	.	.	.	Pathogenic	Hyperglycinuria|Iminoglycinuria,_digenic
chr5	7895862	7895749	rs147277149	C	T	MTRR	NM_024010.2	exon12	c.1573C>T	p.R525X	stopgain	0.000111383	0	0	.	.	1/4290	.	.	.	.	A	Pathogenic	not_provided
chr5	13701425	13701316	rs775696136	T	TA	DNAH5	NM_001369.2	exon77	c.13458dupT	p.N4487*	stopgain	0.000111383	0	0	.	.	1/4290	.	.	.	.	.	Pathogenic/Likely_pathogenic	Primary_ciliary_dyskinesia
chr5	13777418	13777309	rs769054713	G	A	DNAH5	NM_001369.2	exon54	c.8998C>T	p.R3000X	stopgain	0.000111383	0	9.56e-05	.	.	1/4290	.	.	.	.	A	Pathogenic	Primary_ciliary_dyskinesia
chr5	35692670	35692568	.	A	G	SPEF2	NM_024867.3	intron11	c.1745-2A>G		splicing	0.000222767	0	3.19e-05	.	.	1/4290	.	.	.	.	D	Pathogenic	SPERMATOGENIC_FAILURE_43
chr5	37154075	37153973	rs147416429	G	A	CPLANE1	NM_023073.4	exon41	c.7978C>T	p.R2660X	stopgain	0.00033415	0	6.37e-05	1/426	.	2/4290	.	.	.	.	A	Pathogenic	Joubert_syndrome_17
chr5	38925351	38925249	rs387906823	A	C	OSMR	NM_003999.2	exon15	c.2090A>C	p.K697T	missense	0.00100245	0	6.37e-05	.	.	5/4290	.	D	D	D	D	Pathogenic	Primary_localized_cutaneous_amyloidosis_1
chr5	39341378	39341276	rs121909592	G	A	C9	NM_001737.3	exon4	c.346C>T	p.R116X	stopgain	0.00712854	0	0.0001	1/426	1/84	35/4290	2/102	.	.	.	A	Pathogenic	Complement_component_9_deficiency
chr5	40936439	40936337	rs531103546	G	T	C7	NM_000587.2	intron5	c.281-1G>T		splicing	0.00122522	0.000196232	3.19e-05	1/426	.	6/4290	1/102	.	.	.	D	Pathogenic	Complement_component_7_deficiency
chr5	40959622	40959520	rs121964920	C	A	C7	NM_000587.2	exon12	c.1561C>A	p.R521S	missense	0.00033415	0	0	2/426	.	.	.	D	D	D	A	Pathogenic	Complement_component_7_deficiency|C7_and_C6_deficiency,_combined_subtotal|not_provided
chr5	52405544	53109714	rs121908607	G	A	MOCS2	NM_004531.4	exon1	c.16C>T	p.Q6X	stopgain	0.000556917	0	3.33e-05	.	.	2/4290	.	.	.	.	A	Pathogenic	Molybdenum_cofactor_deficiency,_complementation_group_A|Molybdenum_cofactor_deficiency,_complementation_group_B
chr5	60214092	60918265	rs774542633	TTGTAA	T	ERCC8	NM_000082.3	exon4	c.394_398del	p.L132Nfs*6	frameshift deletion	0.00033415	0.000196232	6.58e-05	.	.	2/4290	.	.	.	.	.	Pathogenic	Cockayne_syndrome_type_A|not_provided
chr5	63258025	63962198	rs367956927	CT	C	HTR1A	NM_000524.3	UTR5	c.-480delA		UTR5	0.00846514	0	0	3/426	.	39/4290	2/102	.	.	.	.	Pathogenic	Periodic_fever,_menstrual_cycle-dependent
chr5	78365341	79069518	rs56774046	A	G	DMGDH	NM_013391.3	intron1	c.101+2T>C		splicing	0.00523502	0	0	5/426	.	22/4290	.	.	.	.	D	Likely_pathogenic	not_provided
chr5	118814620	119478925	rs775766910	A	G	HSD17B4	NM_001199291.2	exon9	c.601A>G	p.N201D	missense	0.000222767	0	3.2e-05	1/426	.	.	.	D	P	D	D	Likely_pathogenic	not_provided
chr5	131533916	132198223	.	CCA	C	P4HA2	NM_004199.2	exon12	c.1352_1353del	p.V451Gfs*9	frameshift deletion	0.000111383	0	3.19e-05	.	.	1/4290	.	.	.	.	.	Pathogenic	Myopia_25,_autosomal_dominant
chr5	131544863	132209170	rs758872875	C	T	P4HA2	NM_004199.2	exon7	c.871G>A	p.E291K	missense	0.0006683	0	0	.	.	4/4290	.	D	D	D	D	Pathogenic	Myopia_25,_autosomal_dominant
chr5	131549659	132213966	rs764211125	T	C	P4HA2	NM_004199.2	exon5	c.419A>G	p.Q140R	missense	0.0013366	0	0	.	.	9/4290	.	D	D	D	D	Pathogenic	Myopia_25,_autosomal_dominant
chr5	131705715	132370023	rs11568520	C	G	SLC22A5	NM_003060.3	exon1	c.51C>G	p.F17L	missense	0.00245043	0	0	.	.	13/4290	.	D	D	P	D	Pathogenic/Likely_pathogenic	Renal_carnitine_transport_defect|not_provided
chr5	131721127	132385435	rs121908893	C	T	SLC22A5	NM_003060.3	exon4	c.760C>T	p.R254X	stopgain	0.00211628	0	0	.	.	10/4290	1/102	.	.	.	A	Pathogenic	Renal_carnitine_transport_defect|not_specified|not_provided
chr5	131722757	132387065	rs386134212	C	T	SLC22A5	NM_003060.3	exon5	c.865C>T	p.R289X	stopgain	0.00033415	0	0	1/426	.	2/4290	.	.	.	.	A	Pathogenic	Renal_carnitine_transport_defect
chr5	131726581	132390889	rs1057518297	C	T	SLC22A5	NM_003060.3	exon7	c.1252C>T	p.Q418X	stopgain	0.000222767	0.000196232	6.37e-05	.	.	2/4290	.	.	.	.	A	Pathogenic	Renal_carnitine_transport_defect|not_provided
chr5	131728257	132392565	rs60376624	C	G	SLC22A5	NM_003060.3	exon8	c.1400C>G	p.S467C	missense	0.00378703	0.000392465	0.0002	4/426	1/84	14/4290	1/102	D	D	D	D	Pathogenic/Likely_pathogenic	Renal_carnitine_transport_defect|not_provided
chr5	131931348	132595656	.	CAG	C	RAD50	NM_005732.3	exon13	c.2054_2055del	p.R686Sfs*7	frameshift deletion	0.000111383	0	0	.	.	1/4290	.	.	.	.	.	Pathogenic	Hereditary_cancer-predisposing_syndrome
chr5	131931451	132595759	rs397507178	T	TA	RAD50	NM_005732.3	exon13	c.2157dupA	p.E723Gfs*5	frameshift insertion	0.000445534	0	3.19e-05	1/426	.	2/4290	.	.	.	.	.	Pathogenic	Hereditary_cancer-predisposing_syndrome|Nijmegen_breakage_syndrome-like_disorder|not_provided
chr5	131973850	132638158	rs778555849	C	T	RAD50	NM_005732.3	exon23	c.3553C>T	p.R1185X	stopgain	0.000222767	0	0	.	.	2/4290	.	.	.	.	A	Pathogenic	Hereditary_cancer-predisposing_syndrome|not_provided
chr5	135391459	136055770	rs121909212	C	A	TGFBI	NM_000358.2	exon11	c.1501C>A	p.P501T	missense	0.00512364	0	3.19e-05	3/426	1/84	15/4290	1/102	D	D	D	A	Likely_pathogenic	Corneal_dystrophy|Lattice_corneal_dystrophy_type_3A
chr5	137906676	138570987	rs765368797	T	C	HSPA9	NM_004134.6	exon4	c.383A>G	p.Y128C	missense	0.000111383	0	3.19e-05	.	.	1/4290	.	D	P	P	D	Pathogenic	Even-plus_syndrome
chr5	147207583	147828020	rs148954387	A	G	SPINK1	NM_003122.4	intron4	c.194+2T>C		splicing	0.00345289	0	0	1/426	.	14/4290	.	.	.	.	D	Pathogenic	Chronic_pancreatitis|Inborn_genetic_diseases|Hereditary_pancreatitis|Tropical_calcific_pancreatitis|not_specified
chr5	147499874	148120311	rs587777750	G	GA	SPINK5	NM_001127698.1	exon26	c.2459dupA	p.K824Efs*4	frameshift insertion	0.000779684	0	0.0003	.	1/84	3/4290	1/102	.	.	.	.	Pathogenic	Netherton_syndrome|not_provided
chr5	148407917	149028354	.	G	A	SH3TC2	NM_024577.3	exon11	c.1378C>T	p.Q460X	stopgain	0.000111383	0	0	.	.	1/4290	.	.	.	.	A	Pathogenic	Charcot-Marie-Tooth_disease
chr5	149264112	149884549	rs753942596	G	A	PDE6A	NM_000440.2	exon16	c.1957C>T	p.R653X	stopgain	0.000111383	0	0.0002	1/426	.	.	.	.	.	.	A	Pathogenic	Retinitis_pigmentosa|Inborn_genetic_diseases|not_provided
chr5	149357826	149978263	.	T	G	SLC26A2	NM_000112.3	exon2	c.611T>G	p.L204X	stopgain	0.000445534	0	0	.	1/84	1/4290	.	.	.	.	A	Likely_pathogenic	Multiple_epiphyseal_dysplasia_4
chr5	150227998	150848436	rs10065172	C	T	IRGM	NM_001145805.1	exon2	c.313C>T	p.L105L	synonymous	0.435286	0	0.0003	169/426	33/84	1859/4290	43/102	.	.	.	.	Pathogenic	Inflammatory_bowel_disease_19
chr5	167943865	168516860	rs369398935	G	A	RARS	NM_002887.3	exon13	c.1535G>A	p.R512Q	missense	0.000111383	0	3.18e-05	.	.	1/4290	.	D	D	D	D	Likely_pathogenic	Leukodystrophy,_hypomyelinating,_9
chr5	176053473	176626472	rs104893936	C	T	SNCB	NM_001001502.1	exon5	c.208G>A	p.V70M	missense	0.0006683	0	0	.	.	2/4290	.	T	B	B	A	Pathogenic	Lewy_body_dementia
chr5	176520243	177093242	rs351855	G	A	FGFR4	NM_213647.2	exon9	c.1162G>A	p.G388R	missense	0.431165	0	0.0002	155/426	34/84	1897/4290	51/102	T	D	P	P	Pathogenic	Cancer_progression_and_tumor_cell_motility
chr5	177031401	177604400	rs879255634	G	GC	B4GALT7	NM_007255.2	exon2	c.273dupC	p.H93Pfs*73	frameshift insertion	0.000445534	0.00255102	0.0004	.	.	2/4290	.	.	.	.	.	Pathogenic	Ehlers-Danlos_syndrome_progeroid_type
chr5	178413394	178986393	rs62638214	G	A	GRM6	NM_000843.3	exon9	c.1861C>T	p.R621X	stopgain	0.000222767	0	0	.	.	2/4290	.	.	.	.	A	Pathogenic	Leber_congenital_amaurosis|Congenital_stationary_night_blindness,_type_1B|not_provided
chr6	5369270	5369037	rs146988468	C	T	FARS2	NM_006567.3	exon2	c.467C>T	p.T156M	missense	0.00033415	0	0.0001	.	.	1/4290	.	D	D	D	D	Likely_pathogenic	Combined_oxidative_phosphorylation_deficiency_14
chr6	10626680	10626447	rs56141211	G	A	GCNT2	NM_145649.4	exon5	c.1049G>A	p.G350E	missense	0.000111383	0	0	.	.	1/4290	.	D	P	B	A	Pathogenic	Cataract_13_with_adult_i_phenotype
chr6	10626785	10626552	rs55940927	G	A	GCNT2	NM_145649.4	exon5	c.1154G>A	p.R385H	missense	0.000222767	0	3.19e-05	.	.	1/4290	.	D	B	B	A	Pathogenic	Cataract_13_with_adult_i_phenotype
chr6	10804119	10803886	rs387906648	C	T	MAK	NM_001242957.1	exon6	c.497G>A	p.R166H	missense	0.000111383	0	0	.	1/84	.	.	D	D	D	D	Pathogenic	Retinitis_pigmentosa|Retinitis_pigmentosa_62
chr6	31748303	31780526	rs150882285	C	T	VARS	NM_006295.2	exon25	c.2840G>A	p.R947H	missense	0.000111383	0	0.0001	.	.	1/4290	.	D	D	D	D	Likely_pathogenic	NEURODEVELOPMENTAL_DISORDER_WITH_MICROCEPHALY,_SEIZURES,_AND_CORTICAL_ATROPHY
chr6	31829889	31862112	rs104893985	G	A	NEU1	NM_000434.3	exon2	c.239C>T	p.P80L	missense	0.00033415	0	3.19e-05	1/426	.	1/4290	.	D	D	D	A	Pathogenic	Sialidosis,_type_II
chr6	39893446	39925702	rs377167949	G	A	MOCS1	NM_005943.5	exon2	c.394C>T	p.R132W	missense	0.00178213	0	3.19e-05	.	.	11/4290	1/102	D	D	D	D	Likely_pathogenic	not_provided
chr6	42928654	42960916	rs121907888	T	C	GNMT	NM_018960.4	exon1	c.149T>C	p.L50P	missense	0.000222767	0	0.0002	.	.	2/4290	.	D	D	P	A	Pathogenic	Glycine_N-methyltransferase_deficiency
chr6	43488440	43520702	rs772343871	G	A	POLR1C	NM_203290.2	exon7	c.733G>A	p.V245M	missense	0.000111383	0	0	.	.	1/4290	.	D	D	D	D	Pathogenic	Leukodystrophy,_hypomyelinating,_11
chr6	43488700	43520962	rs191582628	G	A	POLR1C	NM_203290.2	exon8	c.836G>A	p.R279Q	missense	0.00033415	0	3.19e-05	.	.	3/4290	.	D	D	D	D	Pathogenic/Likely_pathogenic	Mandibulofacial_dysostosis,_Treacher_Collins_type,_autosomal_recessive|Leukodystrophy,_hypomyelinating,_11|not_provided
chr6	43488935	43521197	rs181576159	C	T	POLR1C	NM_203290.2	exon9	c.938C>T	p.T313M	missense	0.000222767	0	0	1/426	1/84	.	.	D	D	D	D	Pathogenic	Leukodystrophy,_hypomyelinating,_11
chr6	43738449	43770712	rs756155710	G	GGACA	VEGFA	NM_001025366.2	exon1	c.6_7insGACA	p.T8Rfs*78	frameshift insertion	0.000445534	0	0	1/426	.	1/4290	.	.	.	.	.	Likely_pathogenic	not_provided
chr6	46677098	46709361	rs76863441	C	A	PLA2G7	NM_005084.3	exon9	c.835G>T	p.V279F	missense	0.053464	0	3.2e-05	29/426	2/84	239/4290	4/102	D	D	D	P	Pathogenic,_risk_factor	Platelet-activating_factor_acetylhydrolase_deficiency
chr6	49409685	49441972	rs754369323	C	T	MMUT	NM_000255.4	intron10	c.1677-1G>A		splicing	0.00033415	0.0131476	0.0045	.	.	2/4290	.	.	.	.	D	Pathogenic	Methylmalonic_aciduria_due_to_methylmalonyl-CoA_mutase_deficiency
chr6	49412365	49444652	rs753564352	C	T	MMUT	NM_000255.4	exon9	c.1663G>A	p.A555T	missense	0.000779684	0.000196232	9.56e-05	1/426	.	1/4290	.	D	D	D	D	Likely_pathogenic	Methylmalonic_aciduria_due_to_methylmalonyl-CoA_mutase_deficiency|not_provided
chr6	49419406	49451693	rs772552898	G	A	MMUT	NM_000255.4	exon6	c.1105C>T	p.R369C	missense	0.000111383	0.000392465	0.0002	1/426	.	.	.	D	D	D	D	Pathogenic	Methylmalonic_aciduria_due_to_methylmalonyl-CoA_mutase_deficiency|not_provided
chr6	49425427	49457714	rs780283588	C	CAA	MMUT	NM_000255.4	exon3	c.729_730insTT	p.D244Lfs*39	frameshift insertion	0.000222767	0	6.37e-05	2/426	.	.	.	.	.	.	.	Pathogenic	Methylmalonic_acidemia|Methylmalonic_aciduria_due_to_methylmalonyl-CoA_mutase_deficiency
chr6	49426857	49459144	rs483352778	C	T	MMUT	NM_000255.4	exon2	c.323G>A	p.R108H	missense	0.000556917	0	0	.	1/84	1/4290	.	D	D	D	D	Pathogenic	Methylmalonic_acidemia|Methylmalonic_aciduria_due_to_methylmalonyl-CoA_mutase_deficiency|METHYLMALONIC_ACIDURIA,_mut(0)_TYPE|not_provided
chr6	51491794	51626996	.	C	A	PKHD1	NM_138694.3	intron66	c.11785+1G>T		splicing	0.000222767	0	0	.	1/84	.	.	.	.	.	D	Likely_pathogenic	Autosomal_recessive_polycystic_kidney_disease
chr6	51910887	52046089	rs199568593	A	G	PKHD1	NM_138694.3	exon24	c.2507T>C	p.V836A	missense	0.00178213	0	0	2/426	.	8/4290	.	D	D	P	N	Pathogenic/Likely_pathogenic	Autosomal_recessive_polycystic_kidney_disease|not_provided
chr6	51913356	52048558	rs398124478	G	A	PKHD1	NM_138694.3	exon23	c.2341C>T	p.R781X	stopgain	0.000222767	0	0.0003	1/426	.	1/4290	.	.	.	.	A	Pathogenic	Autosomal_recessive_polycystic_kidney_disease|not_provided
chr6	52101937	52237139	rs748486078	G	A	IL17F	NM_052872.3	exon3	c.284C>T	p.S95L	missense	0.000222767	0.000196232	6.37e-05	.	.	2/4290	.	D	D	D	N	Pathogenic	Candidiasis,_familial,_6
chr6	64430739	63720843	rs886044149	CTG	C	EYS	NM_001292009.1	exon44	c.9249_9250del	p.N3083Kfs*9	frameshift deletion	0.000111383	0.000196232	3.19e-05	1/426	.	.	.	.	.	.	.	Pathogenic	not_provided
chr6	64472413	63762520	rs527236076	A	T	EYS	NM_001292009.1	exon41	c.8012T>A	p.L2671X	stopgain	0.000222767	0.000196232	6.37e-05	.	.	2/4290	.	.	.	.	A	Likely_pathogenic	Retinitis_pigmentosa
chr6	64472476	63762583	rs374714909	G	A	EYS	NM_001292009.1	exon41	c.7949C>T	p.S2650F	missense	0.00111383	0	0	.	1/84	2/4290	.	T	D	D	D	Likely_pathogenic	Retinal_dystrophy
chr6	64791763	64081870	rs527236068	C	T	EYS	NM_001292009.1	exon32	c.6557G>A	p.G2186E	missense	0.00122522	0	0	2/426	.	5/4290	.	D	P	P	N	Pathogenic	Retinitis_pigmentosa
chr6	66112499	65402606	rs776564041	C	T	EYS	NM_001292009.1	intron6	c.1057-1G>A		splicing	0.000556917	0.000196232	0	.	.	3/4290	.	.	.	.	D	Likely_pathogenic	not_provided
chr6	72960710	72251007	rs121918302	G	A	RIMS1	NM_014989.5	exon14	c.2459G>A	p.R820H	missense	0.000222767	0	6.37e-05	.	.	1/4290	.	D	B	B	A	Pathogenic	Cone-rod_dystrophy_7
chr6	80982916	80273199	rs398124561	C	T	BCKDHB	NM_183050.2	exon9	c.1016C>T	p.S339L	missense	0.000111383	0.000196232	6.37e-05	.	.	1/4290	.	D	D	B	D	Pathogenic	not_provided
chr6	88240588	87530870	rs769473411	G	A	RARS2	NM_020320.3	exon9	c.685C>T	p.R229X	stopgain	0.000111383	0.000392465	6.37e-05	.	.	1/4290	.	.	.	.	A	Pathogenic	not_provided
chr6	88299675	87589957	rs774923951	T	C	RARS2	NM_020320.3	exon1	c.1A>G	p.M1?	startloss	0.000222767	0	0.0004	.	.	1/4290	.	D	B	B	D	Pathogenic	Inborn_genetic_diseases|Pontocerebellar_hypoplasia_type_6|not_provided
chr6	99347158	98899282	rs201889294	G	A	FBXL4	NM_001278716.1	exon7	c.1303C>T	p.R435X	stopgain	0.000111383	0	0	.	.	1/4290	.	.	.	.	A	Pathogenic	Inborn_genetic_diseases|Mitochondrial_DNA_depletion_syndrome|Mitochondrial_DNA_depletion_syndrome_13_(encephalomyopathic_type)
chr6	107070811	106622936	rs372054380	C	T	RTN4IP1	NM_032730.4	exon2	c.308G>A	p.R103H	missense	0.000111383	0.000392465	3.19e-05	.	.	1/4290	.	D	D	D	D	Pathogenic	Optic_atrophy_10_with_or_without_ataxia,_mental_retardation,_and_seizures
chr6	108214754	107893550	rs797044656	G	GT	SEC63	NM_007214.4	exon16	c.1605dupA	p.P536Tfs*24	frameshift insertion	0.00222767	0.000196232	0.0004	3/426	.	12/4290	.	.	.	.	.	Pathogenic	not_provided
chr6	110056379	109735176	rs397514707	T	C	FIG4	NM_014845.5	exon6	c.524T>C	p.L175P	missense	0.000111383	0	0	.	.	1/4290	.	D	D	D	D	Pathogenic	Yunis_Varon_syndrome
chr6	116949261	116628098	rs753041231	G	A	RSPH4A	NM_001010892.2	exon3	c.1391G>A	p.G464E	missense	0.000111383	0	0	.	.	1/4290	.	D	D	D	D	Pathogenic	Primary_ciliary_dyskinesia
chr6	129511381	129190236	rs1064794941	G	A	LAMA2	NM_000426.3	exon11	c.1499G>A	p.C500Y	missense	0.000111383	0.218603	0.253	.	.	1/4290	.	D	D	D	D	Likely_pathogenic	not_provided
chr6	129785589	129464444	rs121913576	C	T	LAMA2	NM_000426.3	exon50	c.7147C>T	p.R2383X	stopgain	0.000111383	0	0	.	.	1/4290	.	.	.	.	A	Pathogenic	Merosin_deficient_congenital_muscular_dystrophy|Congenital_muscular_dystrophy_due_to_partial_LAMA2_deficiency|Laminin_alpha_2-related_dystrophy|not_provided
chr6	132179875	131858735	rs267606784	C	G	ENPP1	NM_006208.2	exon7	c.783C>G	p.Y261X	stopgain	0.000222767	0	0	.	.	1/4290	.	.	.	.	A	Pathogenic	Arterial_calcification,_generalized,_of_infancy,_1
chr6	135759537	135438399	rs772989270	G	A	AHI1	NM_001134831.1	exon15	c.2012C>T	p.T671I	missense	0.000111383	0.000392465	0	.	.	1/4290	.	D	D	D	D	Pathogenic	Joubert_syndrome_3
chr6	135778798	135457660	rs201391050	G	A	AHI1	NM_001134831.1	exon9	c.985C>T	p.R329X	stopgain	0.000111383	0	0	.	.	.	1/102	.	.	.	A	Pathogenic	Joubert_syndrome_3|not_provided
chr6	137146399	136825261	rs1085307085	CT	C	PEX7	NM_000288.3	exon2	c.179delT	p.F61Lfs*13	frameshift deletion	0.000445534	0	3.19e-05	.	.	2/4290	.	.	.	.	.	Pathogenic/Likely_pathogenic	Rhizomelic_chondrodysplasia_punctata_type_1|Peroxisome_biogenesis_disorder_9B
chr6	151936677	151615542	rs6929137	G	A	CCDC170	NM_025059.3	exon10	c.1810G>A	p.V604I	missense	0.329806	0	9.56e-05	125/426	31/84	1431/4290	30/102	T	B	B	P	Likely_pathogenic	Estrogen_resistance
chr6	158567859	158146827	rs387907236	G	A	SERAC1	NM_032861.3	exon6	c.442C>T	p.R148X	stopgain	0.000111383	0	3.19e-05	.	.	.	1/102	.	.	.	A	Pathogenic	3-methylglutaconic_aciduria_with_deafness,_encephalopathy,_and_Leigh-like_syndrome|not_provided
chr6	159403528	158982496	.	G	A	RSPH3	NM_031924.4	exon5	c.1111C>T	p.R371X	stopgain	0.000111383	0.000196232	3.19e-05	.	.	1/4290	.	.	.	.	A	Pathogenic	Ciliary_dyskinesia,_primary,_32
chr7	781004	741367	.	G	A	DNAAF5	NM_017802.3	exon4	c.926G>A	p.W309X	stopgain	0.000111383	0.0243328	0.0123	.	.	1/4290	.	.	.	.	A	Pathogenic	Primary_ciliary_dyskinesia
chr7	4823933	4784302	rs751778396	C	T	AP5Z1	NM_014855.2	exon6	c.721C>T	p.Q241X	stopgain	0.00033415	0	6.38e-05	.	.	1/4290	.	.	.	.	A	Likely_pathogenic	not_provided
chr7	21750214	21710596	rs201943194	C	T	DNAH11	NM_001277115.1	exon41	c.6727C>T	p.R2243X	stopgain	0.000111383	0	3.18e-05	.	.	1/4290	.	.	.	.	A	Pathogenic/Likely_pathogenic	Primary_ciliary_dyskinesia|Ciliary_dyskinesia,_primary,_7|not_provided
chr7	23299622	23260003	rs140352180	C	T	GPNMB	NM_001005340.1	exon5	c.565C>T	p.R189X	stopgain	0.0026732	0	3.19e-05	1/426	1/84	10/4290	.	.	.	.	A	Pathogenic	AMYLOIDOSIS,_PRIMARY_LOCALIZED_CUTANEOUS,_3
chr7	31890328	31850714	rs775633137	C	A	PDE1C	NM_001191058.2	exon9	c.958G>T	p.A320S	missense	0.000222767	0	0	.	.	2/4290	.	D	D	D	D	Pathogenic/Likely_pathogenic	DEAFNESS,_AUTOSOMAL_DOMINANT_74|Autosomal_dominant_non-syndromic_sensorineural_deafness_type_DFNA
chr7	55242487	55174794	rs121913231	C	T	EGFR	NM_005228.3	exon19	c.2257C>T	p.P753S	missense	0.00033415	0	3.18e-05	.	.	1/4290	.	D	P	B	D	Likely_pathogenic	Non-small_cell_lung_cancer|Head_and_Neck_Neoplasms
chr7	65426009	65961022	rs121918176	G	A	GUSB	NM_000181.3	exon12	c.1831C>T	p.R611W	missense	0.000111383	0.000784929	0.0002	.	.	1/4290	.	D	D	D	A	Pathogenic	Mucopolysaccharidosis_type_VII
chr7	65435316	65970329	rs774393243	G	A	GUSB	NM_000181.3	exon9	c.1429C>T	p.R477W	missense	0.000111383	0	0.0002	.	.	1/4290	.	D	D	D	D	Pathogenic	Mucopolysaccharidosis_type_VII
chr7	66458275	66993288	rs201070132	C	T	SBDS	NM_016038.2	exon3	c.388G>A	p.V130M	missense	0.000222767	0.000392465	3.19e-05	1/426	.	.	.	T	P	B	D	Likely_pathogenic	Shwachman-Diamond_syndrome_1|not_provided
chr7	75614497	75985179	rs28931608	G	A	POR	NM_000941.2	exon12	c.1370G>A	p.R457H	missense	0.000445534	0	0	1/426	.	3/4290	.	D	D	D	A	Pathogenic/Likely_pathogenic	Disordered_steroidogenesis_due_to_cytochrome_p450_oxidoreductase_deficiency|Antley-Bixler_syndrome_with_genital_anomalies_and_disordered_steroidogenesis
chr7	80286003	80656687	rs75326924	C	T	CD36	NM_001001548.2	exon4	c.268C>T	p.P90S	missense	0.000556917	0	0	.	1/84	3/4290	.	D	D	D	A	Pathogenic	Platelet_disorder|Platelet_glycoprotein_IV_deficiency
chr7	80290425	80661109	rs1085307059	AAC	A	CD36	NM_001001548.2	exon5	c.329_330del	p.T111Sfs*22	frameshift deletion	0.00501225	0	0	.	.	20/4290	2/102	.	.	.	.	Pathogenic	Platelet_glycoprotein_IV_deficiency
chr7	80299280	80669964	rs142186404	T	C	CD36	NM_001001548.2	exon9	c.760T>C	p.F254L	missense	0.000779684	0	0.0001	.	.	5/4290	.	D	D	D	D	Pathogenic	Platelet_glycoprotein_IV_deficiency
chr7	80302116	80672800	rs148910227	C	T	CD36	NM_001001548.2	exon12	c.1156C>T	p.R386W	missense	0.00412119	0	0	1/426	.	22/4290	1/102	D	D	D	D	Likely_pathogenic	Platelet_glycoprotein_IV_deficiency
chr7	87074281	87444965	rs765735641	G	GA	ABCB4	NM_018849.2	exon10	c.1015dupT	p.S339Ffs*17	frameshift insertion	0.0013366	0	0	4/426	.	6/4290	.	.	.	.	.	Pathogenic	Cholestasis,_intrahepatic,_of_pregnancy_3
chr7	92118677	92489363	rs769836601	GTGAC	G	PEX1	NM_000466.2	exon23	c.3693_3696del	p.Q1231Hfs*3	frameshift deletion	0.000111383	0	3.19e-05	.	.	1/4290	.	.	.	.	.	Pathogenic/Likely_pathogenic	Peroxisome_biogenesis_disorder_1B|Peroxisome_biogenesis_disorder_1A_(Zellweger)|not_provided
chr7	92146720	92517406	rs755998864	AT	A	PEX1	NM_000466.2	exon5	c.1108delA	p.I370Lfs*17	frameshift deletion	0.000779684	0	0	3/426	.	3/4290	.	.	.	.	.	Likely_pathogenic	Peroxisome_biogenesis_disorder_1B|Peroxisome_biogenesis_disorder_1A_(Zellweger)
chr7	92157745	92528431	rs762679408	C	T	PEX1	NM_000466.2	exon1	c.5G>A	p.W2X	stopgain	0.000111383	0	0	.	.	1/4290	.	.	.	.	A	Pathogenic/Likely_pathogenic	Peroxisome_biogenesis_disorder_1A_(Zellweger)
chr7	95818683	96189371	rs80338720	TCATA	T	SLC25A13	NM_001160210.1	exon9	c.852_855del	p.M285Pfs*2	frameshift deletion	0.00612609	0	0.0001	.	.	27/4290	1/102	.	.	.	.	Pathogenic	Neonatal_intrahepatic_cholestasis_caused_by_citrin_deficiency|Citrullinemia_type_II|Citrin_deficiency|not_provided
chr7	95822344	96193032	rs80338717	C	T	SLC25A13	NM_001160210.1	intron6	c.615+5G>A		splicing	0.000891067	0	9.56e-05	.	.	2/4290	.	.	.	.	.	Pathogenic/Likely_pathogenic	Neonatal_intrahepatic_cholestasis_caused_by_citrin_deficiency|Citrullinemia_type_II|Citrin_deficiency|not_provided
chr7	99702937	100105314	rs780030221	C	T	AP4M1	NM_004722.3	exon10	c.802C>T	p.R268X	stopgain	0.00033415	0	3.19e-05	.	.	1/4290	.	.	.	.	A	Pathogenic	Spastic_paraplegia_50,_autosomal_recessive
chr7	100850904	101207623	rs748105435	A	C	PLOD3	NM_001084.4	exon17	c.1890T>G	p.Y630X	stopgain	0.00033415	0	0	1/426	.	1/4290	.	.	.	.	A	Likely_pathogenic	Bone_fragility_with_contractures,_arterial_rupture,_and_deafness
chr7	107323898	107683453	rs111033313	A	G	SLC26A4	NM_000441.1	intron8	c.919-2A>G		splicing	0.0040098	0.000588697	0.0002	.	3/84	21/4290	.	.	.	.	D	Pathogenic	Enlarged_vestibular_aqueduct|Pendred_syndrome|not_provided|Rare_genetic_deafness
chr7	107330593	107690148	rs201562855	A	T	SLC26A4	NM_000441.1	exon10	c.1174A>T	p.N392Y	missense	0.000111383	0.000392465	0.0002	1/426	.	.	.	D	D	D	D	Pathogenic	Enlarged_vestibular_aqueduct|not_provided
chr7	107330645	107690200	rs111033305	G	A	SLC26A4	NM_000441.1	exon10	c.1226G>A	p.R409H	missense	0.000445534	0	3.19e-05	.	.	3/4290	.	D	D	D	D	Pathogenic	Enlarged_vestibular_aqueduct|Pendred_syndrome|not_specified|not_provided|Rare_genetic_deafness
chr7	107330648	107690203	rs111033220	C	T	SLC26A4	NM_000441.1	exon10	c.1229C>T	p.T410M	missense	0.00100245	0.000392465	3.19e-05	.	.	3/4290	.	D	D	D	D	Pathogenic	Enlarged_vestibular_aqueduct|Pendred_syndrome|not_provided|Rare_genetic_deafness
chr7	107338487	107698042	rs786204450	T	TC	SLC26A4	NM_000441.1	exon14	c.1546dupC	p.S517Ffs*10	frameshift insertion	0.000111383	0.000196232	6.38e-05	.	.	.	1/102	.	.	.	.	Likely_pathogenic	Pendred_syndrome
chr7	107344827	107704382	rs752807925	C	T	SLC26A4	NM_000441.1	exon18	c.2086C>T	p.Q696X	stopgain	0.000111383	0.00156986	0.0023	.	.	1/4290	.	.	.	.	A	Pathogenic/Likely_pathogenic	Enlarged_vestibular_aqueduct|Pendred_syndrome|not_provided
chr7	107350577	107710132	rs121908362	A	G	SLC26A4	NM_000441.1	exon19	c.2168A>G	p.H723R	missense	0.0006683	0.000588697	0.0002	1/426	.	2/4290	.	D	D	D	A	Pathogenic/Likely_pathogenic	Enlarged_vestibular_aqueduct|Pendred_syndrome|SLC26A4-Related_Disorders|not_provided|Rare_genetic_deafness
chr7	117180284	117540230	rs121909011	C	T	CFTR	NM_000492.3	exon8	c.1000C>T	p.R334W	missense	0.000222767	0	0	.	.	2/4290	.	D	D	D	A	Pathogenic	Cystic_fibrosis|Hereditary_pancreatitis|Congenital_bilateral_aplasia_of_vas_deferens_from_CFTR_mutation|Bronchiectasis_with_or_without_elevated_sweat_chloride_1|not_specified|not_provided
chr7	117199530	117559476	rs397508203	A	G	CFTR	NM_000492.3	exon11	c.1405A>G	p.M469V	missense	0.000222767	0	0	2/426	.	.	.	T	D	D	D	Pathogenic	CFTR-related_disorders|Cystic_fibrosis
chr7	117232086	117592032	rs121908759	G	A	CFTR	NM_000492.3	exon14	c.1865G>A	p.G622D	missense	0.000111383	0	0.0002	.	.	1/4290	.	D	D	D	D	Pathogenic/Likely_pathogenic	CFTR-related_disorders|Inborn_genetic_diseases|Cystic_fibrosis|Hereditary_pancreatitis|Congenital_bilateral_aplasia_of_vas_deferens_from_CFTR_mutation|Bronchiectasis_with_or_without_elevated_sweat_chloride_1|not_provided
chr7	117246728	117606674	rs386134230	G	A	CFTR	NM_000492.3	exon18	c.2909G>A	p.G970D	missense	0.00100245	0	0	1/426	.	4/4290	.	D	D	D	D	Pathogenic	Cystic_fibrosis|Congenital_bilateral_aplasia_of_vas_deferens_from_CFTR_mutation|not_specified
chr7	142459839	142751988	rs397507440	T	A	PRSS1	NM_002769.4	exon3	c.415T>A	p.C139S	missense	0.000111383	0	3.19e-05	.	.	1/4290	.	D	B	P	D	Pathogenic	Hereditary_pancreatitis
chr7	142574530	142876777	rs529924080	A	G	TRPV6	NM_018646.5	exon5	c.668T>C	p.I223T	missense	0.000445534	0.000981162	0.0004	1/426	.	1/4290	.	T	D	D	D	Likely_pathogenic	HYPERPARATHYROIDISM,_TRANSIENT_NEONATAL
chr7	143028708	143331615	rs201714423	C	T	CLCN1	NM_000083.2	exon10	c.1129C>T	p.R377X	stopgain	0.000222767	0	3.19e-05	.	.	1/4290	.	.	.	.	A	Pathogenic	Congenital_myotonia,_autosomal_recessive_form|Congenital_myotonia,_autosomal_dominant_form|not_provided
chr7	143036388	143339295	rs746125212	G	A	CLCN1	NM_000083.2	exon13	c.1444G>A	p.G482R	missense	0.000556917	0	0	.	.	3/4290	.	D	D	D	D	Pathogenic/Likely_pathogenic	Congenital_myotonia,_autosomal_recessive_form|Congenital_myotonia,_autosomal_dominant_form|not_provided
chr8	6312706	6455185	rs587783735	CAT	C	MCPH1	NM_024596.3	exon9	c.1869_1870del	p.C624*	frameshift deletion	0.000111383	0	3.19e-05	.	.	1/4290	.	.	.	.	.	Pathogenic	Primary_autosomal_recessive_microcephaly_1
chr8	6338233	6480712	rs541042265	A	G	MCPH1	NM_024596.3	intron10	c.1974-2A>G		splicing	0.00189352	0	3.19e-05	.	.	12/4290	1/102	.	.	.	D	Likely_pathogenic	Primary_autosomal_recessive_microcephaly_1|not_provided
chr8	10469636	10612126	rs527236107	G	A	RP1L1	NM_178857.5	exon4	c.1972C>T	p.R658X	stopgain	0.000111383	0.000196232	0.0002	.	.	1/4290	.	.	.	.	D	Likely_pathogenic	Retinitis_pigmentosa
chr8	11418856	11561347	rs146505280	C	T	BLK	NM_001715.2	exon11	c.1075C>T	p.R359C	missense	0.000222767	0	3.19e-05	1/426	.	1/4290	.	D	D	D	D	Pathogenic	Systemic_lupus_erythematosus
chr8	11614521	11757012	rs368489876	G	A	GATA4	NM_002052.4	exon6	c.1075G>A	p.E359K	missense	0.000222767	0.000196232	0.0001	.	.	2/4290	.	T	D	D	D	Pathogenic	Ventricular_septal_defect_1
chr8	27634576	27777059	rs80359852	G	GA	ESCO2	NM_001017420.2	exon3	c.752dupA	p.T254Nfs*27	frameshift insertion	0.000222767	0	0	.	1/84	.	.	.	.	.	.	Pathogenic	Roberts-SC_phocomelia_syndrome
chr8	30922573	31065057	rs1060500056	TAA	T	WRN	NM_000553.4	exon5	c.499_500del	p.K168Afs*10	frameshift deletion	0.000222767	0	0	.	.	2/4290	.	.	.	.	.	Pathogenic	Werner_syndrome
chr8	30925792	31068276	rs370324188	C	T	WRN	NM_000553.4	exon7	c.673C>T	p.R225X	stopgain	0.000111383	0	3.19e-05	.	.	1/4290	.	.	.	.	A	Pathogenic	Werner_syndrome
chr8	31004588	31147072	.	G	GA	WRN	NM_000553.4	exon29	c.3404dupA	p.A1137Sfs*28	frameshift insertion	0.000111383	0	0	1/426	.	.	.	.	.	.	.	Pathogenic	Werner_syndrome
chr8	38005795	38148277	rs781281145	G	A	STAR	NM_000349.2	exon3	c.229C>T	p.Q77X	stopgain	0.000111383	0.000196232	6.38e-05	.	.	1/4290	.	.	.	.	A	Likely_pathogenic	Cholesterol_monooxygenase_(side-chain_cleaving)_deficiency
chr8	75276292	74364057	.	A	G	GDAP1	NM_018972.2	exon6	c.767A>G	p.H256R	missense	0.000111383	0.000392465	3.19e-05	.	.	1/4290	.	D	D	D	D	Pathogenic	Charcot-Marie-Tooth_disease|Charcot-Marie-Tooth_disease,_type_4A|not_provided
chr8	75276294	74364059	rs770501034	C	T	GDAP1	NM_018972.2	exon6	c.769C>T	p.R257X	stopgain	0.000111383	0	0.0003	.	.	1/4290	.	.	.	.	D	Pathogenic	Charcot-Marie-Tooth_disease|Charcot-Marie-Tooth_disease,_recessive_intermediate_A|not_provided
chr8	77896042	76983806	rs61752124	G	A	PEX2	NM_000318.2	exon4	c.373C>T	p.R125X	stopgain	0.000556917	0.000196232	3.19e-05	.	.	2/4290	.	.	.	.	D	Pathogenic/Likely_pathogenic	Peroxisome_biogenesis_disorders,_Zellweger_syndrome_spectrum|Peroxisome_biogenesis_disorder_5B|Peroxisome_biogenesis_disorder_5a_(zellweger)
chr8	87656094	86643866	rs764742792	G	A	CNGB3	NM_019098.4	exon10	c.1063C>T	p.R355X	stopgain	0.00033415	0	0	.	.	2/4290	.	.	.	.	A	Likely_pathogenic	Achromatopsia_3
chr8	90955525	89943297	rs730881864	G	A	NBN	NM_002485.4	exon14	c.2140C>T	p.R714X	stopgain	0.000222767	0	0	.	.	2/4290	.	.	.	.	A	Pathogenic/Likely_pathogenic	Aplastic_anemia|Acute_lymphoid_leukemia|Hereditary_cancer-predisposing_syndrome|Microcephaly,_normal_intelligence_and_immunodeficiency|not_provided
chr8	100168837	99156609	rs180177356	C	T	VPS13B	NM_017890.4	exon15	c.2074C>T	p.R692X	stopgain	0.000111383	0.000588697	3.19e-05	.	.	1/4290	.	.	.	.	A	Pathogenic	Cohen_syndrome|not_provided
chr8	100454845	99442617	rs386834080	C	T	VPS13B	NM_017890.4	exon23	c.3427C>T	p.R1143X	stopgain	0.000111383	0.000196232	6.37e-05	1/426	.	.	.	.	.	.	A	Pathogenic	Cohen_syndrome|not_provided
chr8	100654589	99642361	rs1057517309	T	TA	VPS13B	NM_017890.4	exon34	c.5847dupA	p.Q1950Tfs*32	frameshift insertion	0.000111383	0	0	1/426	.	.	.	.	.	.	.	Likely_pathogenic	Cohen_syndrome
chr8	100732781	99720553	rs202046738	G	T	VPS13B	NM_017890.4	intron38	c.6940+1G>T		splicing	0.000222767	0	0	.	.	1/4290	.	.	.	.	D	Likely_pathogenic	Cohen_syndrome
chr8	100847792	99835564	rs1057516621	CA	C	VPS13B	NM_017890.4	exon54	c.9844delA	p.I3284Ffs*32	frameshift deletion	0.000111383	0.000196232	3.19e-05	.	.	1/4290	.	.	.	.	.	Likely_pathogenic	Cohen_syndrome
chr8	105440299	104428071	rs121964923	T	C	DPYS	NM_001385.2	exon6	c.1001A>G	p.Q334R	missense	0.000556917	0	3.19e-05	1/426	.	3/4290	.	D	D	D	A	Pathogenic	Dihydropyrimidinase_deficiency
chr8	143822617	142741199	rs28937888	C	T	SLURP1	NM_020427.2	exon3	c.256G>A	p.G86R	missense	0.000111383	0	9.56e-05	.	.	1/4290	.	T	D	D	N	Pathogenic	Acroerythrokeratoderma
chr8	145736918	144511535	rs879192998	G	A	RECQL4	NM_004260.3	exon21	c.3523C>T	p.Q1175X	stopgain	0.000111383	0.000588697	3.19e-05	.	.	1/4290	.	.	.	.	.	Likely_pathogenic	not_provided
chr8	145738229	144512846	rs373130543	C	T	RECQL4	NM_004260.3	intron15	c.2755+1G>A		splicing	0.000111383	0	3.19e-05	1/426	.	.	.	.	.	.	.	Likely_pathogenic	Baller-Gerold_syndrome
chr9	12702410	12702410	rs387906562	TACAA	T	TYRP1	NM_000550.2	exon5	c.1054_1057del	p.N353Vfs*31	frameshift deletion	0.000222767	0	0	.	.	1/4290	.	.	.	.	.	Pathogenic	Oculocutaneous_albinism_type_3
chr9	27204927	27204929	rs202131936	G	C	TEK	NM_000459.4	exon14	c.2228G>C	p.G743A	missense	0.000779684	0	0	.	.	4/4290	.	T	B	B	D	Likely_pathogenic	Acute_myeloid_leukemia
chr9	32984797	32984799	rs121908133	T	C	APTX	NM_001195248.1	exon6	c.602A>G	p.H201R	missense	0.000111383	0	0	.	.	1/4290	.	D	D	D	A	Pathogenic	Ataxia-oculomotor_apraxia_type_1
chr9	34513163	34513165	rs79833450	G	A	DNAI1	NM_001281428.1	exon16	c.1555G>A	p.G519S	missense	0.000111383	0	3.19e-05	.	.	1/4290	.	D	D	D	A	Pathogenic/Likely_pathogenic	Primary_ciliary_dyskinesia|Kartagener_syndrome
chr9	34648988	34648991	rs767337193	A	G	GALT	NM_000155.3	intron8	c.821-7A>G		splicing	0.00033415	0.000784929	0.0001	1/426	.	1/4290	.	.	.	.	.	Pathogenic	Deficiency_of_UDPglucose-hexose-1-phosphate_uridylyltransferase
chr9	34649536	34649539	rs111033815	C	A	GALT	NM_000155.3	exon10	c.1034C>A	p.A345D	missense	0.000222767	0	6.37e-05	1/426	.	1/4290	.	D	P	B	A	Pathogenic	Deficiency_of_UDPglucose-hexose-1-phosphate_uridylyltransferase
chr9	35741755	35741758	rs398123013	G	A	GBA2	NM_020944.2	exon4	c.700C>T	p.R234X	stopgain	0.000111383	0.000196232	0	.	.	1/4290	.	.	.	.	A	Pathogenic	Spastic_paraplegia_46,_autosomal_recessive
chr9	36233983	36233986	rs1057516374	G	A	GNE	NM_001128227.2	exon5	c.1009C>T	p.R337X	stopgain	0.000111383	0	0	.	.	1/4290	.	.	.	.	A	Likely_pathogenic	GNE_myopathy
chr9	36246117	36246120	rs139425890	T	A	GNE	NM_001128227.2	exon3	c.620A>T	p.D207V	missense	0.00144798	0	0	.	.	4/4290	.	D	B	B	D	Pathogenic/Likely_pathogenic	GNE_myopathy|not_provided
chr9	36246258	36246261	rs748704459	C	T	GNE	NM_001128227.2	exon3	c.479G>A	p.R160Q	missense	0.000111383	0	6.37e-05	.	.	1/4290	.	T	D	D	D	Pathogenic/Likely_pathogenic	GNE_myopathy
chr9	37430516	37430519	rs180177316	CCT	C	GRHPR	NM_012203.1	exon7	c.608_609del	p.P203Rfs*7	frameshift deletion	0.000111383	0	3.19e-05	.	.	.	1/102	.	.	.	.	Pathogenic	Primary_hyperoxaluria,_type_II
chr9	75309631	72694715	rs775428246	G	A	TMC1	NM_138691.2	intron7	c.236+1G>A		splicing	0.000222767	0	0	1/426	.	.	.	.	.	.	D	Pathogenic/Likely_pathogenic	Deafness,_autosomal_recessive_7|Deafness,_autosomal_dominant_36|Rare_genetic_deafness
chr9	91943589	89328674	rs764344701	C	T	SECISBP2	NM_024077.4	exon5	c.589C>T	p.R197X	stopgain	0.000111383	0	0	.	.	1/4290	.	.	.	.	A	Likely_pathogenic	not_provided
chr9	97365719	94603437	rs757653154	A	AC	FBP1	NM_000507.3	exon7	c.960_961insG	p.S321Vfs*13	frameshift insertion	0.000111383	0.000196232	0	.	.	1/4290	.	.	.	.	.	Pathogenic	Fructose-biphosphatase_deficiency
chr9	97365839	94603557	rs566453434	C	T	FBP1	NM_000507.3	exon7	c.841G>A	p.E281K	missense	0.000111383	0	0	.	.	1/4290	.	D	D	D	D	Pathogenic/Likely_pathogenic	Fructose-biphosphatase_deficiency|not_provided
chr9	97372298	94610016	rs766005419	G	A	FBP1	NM_000507.3	exon4	c.472C>T	p.R158W	missense	0.000111383	0	0	.	.	1/4290	.	D	D	D	D	Pathogenic	Fructose-biphosphatase_deficiency
chr9	97380121	94617839	rs758609113	C	T	FBP1	NM_000507.3	exon3	c.355G>A	p.D119N	missense	0.000111383	0.000196232	0.0048	.	.	1/4290	.	D	D	D	D	Pathogenic/Likely_pathogenic	Fructose-biphosphatase_deficiency|not_provided
chr9	97873816	95111534	rs776037287	T	TG	FANCC	NM_000136.2	exon13	c.1257dupC	p.T420Hfs*15	frameshift insertion	0.000111383	0	3.19e-05	1/426	.	.	.	.	.	.	.	Pathogenic/Likely_pathogenic	Fanconi_anemia|not_provided
chr9	104184173	101421891	rs77718928	G	A	ALDOB	NM_000035.3	exon9	c.1013C>T	p.A338V	missense	0.000556917	0	0	.	.	4/4290	.	D	D	D	D	Pathogenic/Likely_pathogenic	Hereditary_fructosuria|not_provided
chr9	108380248	105617967	rs267606814	C	T	FKTN	NM_001079802.1	exon9	c.919C>T	p.R307X	stopgain	0.000111383	0	0	.	.	1/4290	.	.	.	.	A	Pathogenic	Walker-Warburg_congenital_muscular_dystrophy|Fukuyama_congenital_muscular_dystrophy|Congenital_muscular_dystrophy-dystroglycanopathy_with_brain_and_eye_anomalies,_type_A4|not_provided
chr9	108382269	105619988	rs1057516999	GT	G	FKTN	NM_001079802.1	exon10	c.1100delT	p.F369Sfs*37	frameshift deletion	0.00033415	0	0.0001	.	.	1/4290	.	.	.	.	.	Pathogenic/Likely_pathogenic	Walker-Warburg_congenital_muscular_dystrophy|Fukuyama_congenital_muscular_dystrophy
chr9	123171568	120409290	rs587783390	G	A	CDK5RAP2	NM_018249.5	exon30	c.4441C>T	p.R1481X	stopgain	0.000222767	0	0	.	.	1/4290	.	.	.	.	A	Pathogenic/Likely_pathogenic	Primary_autosomal_recessive_microcephaly_3|not_provided
chr9	126133229	123370950	rs730880377	C	T	CRB2	NM_173689.6	exon7	c.1897C>T	p.R633W	missense	0.000111383	0	6.38e-05	.	.	1/4290	.	D	D	D	D	Pathogenic	Ventriculomegaly_with_cystic_kidney_disease
chr9	127262605	124500326	rs201095702	C	T	NR5A1	NM_004959.4	exon4	c.634G>A	p.G212S	missense	0.000891067	0	0	.	.	2/4290	.	T	B	B	N	Pathogenic	Spermatogenic_failure_8
chr9	131857852	129095573	rs762425351	C	T	CRAT	NM_000755.3	exon14	c.1705G>A	p.V569M	missense	0.000222767	0	3.19e-05	1/426	.	.	1/102	T	P	B	D	Likely_pathogenic	Deficiency_of_carnitine_acetyltransferase
chr9	132576340	129814061	rs80358233	TCTC	T	TOR1A	NM_000113.2	exon5	c.907_909del	p.E303del	nonframeshift deletion	0.000111383	0.022763	0.0129	.	.	1/4290	.	.	.	.	.	Pathogenic/Likely_pathogenic	Dystonia|Dystonia_1|not_provided
chr9	133364791	130489404	rs121908642	C	T	ASS1	NM_000050.4	exon13	c.910C>T	p.R304W	missense	0.000111383	0.0206044	0.011	.	.	1/4290	.	D	P	B	A	Pathogenic	Citrullinemia_type_I|not_provided
chr9	136289599	133424479	rs375415632	G	A	ADAMTS13	NM_139025.4	intron3	c.330+1G>A		splicing	0.0006683	0	0.0003	1/426	.	2/4290	.	.	.	.	D	Likely_pathogenic	Upshaw-Schulman_syndrome
chr9	139327014	136432562	rs121918129	C	T	INPP5E	NM_019892.4	exon6	c.1304G>A	p.R435Q	missense	0.000111383	0	0	.	.	.	1/102	D	D	D	A	Pathogenic	Joubert_syndrome|Joubert_syndrome_1
chr9	139327702	136433250	rs863225198	G	A	INPP5E	NM_019892.4	exon4	c.1064C>T	p.T355M	missense	0.000111383	0	0.0005	1/426	.	.	.	D	D	D	D	Pathogenic	Joubert_syndrome
chr9	139995540	137101088	rs387906886	C	T	MAN1B1	NM_016219.4	exon7	c.1000C>T	p.R334C	missense	0.000111383	0	0	1/426	.	.	.	D	D	D	D	Pathogenic	MAN1B1-Related_Disorders|Mental_retardation,_autosomal_recessive_15

## Sheet: Table 9
Supplementary Table 9. SNVs with significant selection signatures by SDS analysis in the Han Chinese population
Chr	chr3	chr4	chr4	chr4	chr4	chr4	chr4	chr6	chr12	chr12	chr12	chr12	chr16
Position (GRCh37)	52385118	10141871	100239319	100000552	100200509	100134089	100055862	30562979	112241766	112817783	112168009	112110489	12657282
Position (GRCh38)	52351102	10140247	99318162	99079401	99279352	99212932	99134711	30595202	111803962	112379979	111730205	111672685	12563425
ID	rs78947691	rs148629931	rs1229984	rs1154413	rs3819197	rs2156733	rs4148887	rs9380181	rs671	rs11066280	rs11066015	rs3782886	rs75431978
Ancestral/derived allele	G/C	C/A	C/T	G/T	C/T	T/C	A/G	A/T	G/A	T/A	G/A	T/C	G/A
Derived allele frequency (DAF)	0.27	0.058	0.71	0.726	0.79	0.764	0.734	0.151	0.239	0.265	0.24	0.242	0.181
Gene	DNAH1	WDR1	ADH1B	ADH5	ADH1A	ADH6	ADH4	MHC region	ALDH2	HECTD4	ACAD10	BRAP	SNX29
Function	Intron	upstream	Missense	Intron	Intron	Intron	Intron	Intergenic	Missense	Intron	Intron	Synonymous	Intron
NM	NM_015512.4	NM_017491.5	NM_000668.5	NM_000671.4	NM_000667.4	NM_000672.3	NM_000670.4	-	NM_000690.4	NM_001109662.3	NM_025247.5	NM_006768.4	NM_032167.4
cDNA	c.2729+512G>A	-	c.143A>G	c.344+1964C>A	c.1103+74G>A	c.262+674A>G	c.582+1755T>C	-	c.1510G>A	c.-256+1973A>T	c.1394+249G>A	c.723A>G	c.2319-5081G>A
Protein	-	-	p.His48Arg	-	-	-	-	-	p.Glu504Lys	-		p.Arg241Arg	-
Z-score	5.56	5.44	8.09	7.7	7.17	6.85	6.63	6.53	7.67	7.4	7	6.9274	8.1
pValue	2.65e-08	5.44e-08	6.07E-16	1.38E-14	7.62E-13	7.59E-12	3.36E-11	6.43E-11	1.68E-14	1.41E-13	2.57E-12	4.11E-12	5.54E-16
DAF 1KG EAS	0.272	0.062	0.697	0.726	0.799	0.784	0.734	0.126	0.174	0.216	0.176	0.175	0.146
DAF 1KG EAS-CHB	0.214	0.039	0.709	0.689	0.791	0.757	0.689	0.078	0.16	0.189	0.16	0.155	0.175
DAF 1KG EAS-CHS	0.31	0.067	0.757	0.771	0.848	0.814	0.771	0.148	0.271	0.295	0.281	0.271	0.2
DAF 1KG EAS-CDX	0.355	0.081	0.634	0.737	0.753	0.758	0.731	0.258	0.043	0.134	0.043	0.043	0.113
DAF 1KG EAS-JPT	0.144	0.067	0.731	0.707	0.803	0.812	0.726	0.053	0.24	0.236	0.24	0.25	0.12
DAF 1KG EAS-KHV	0.348	0.056	0.646	0.727	0.793	0.773	0.753	0.106	0.136	0.217	0.136	0.136	0.116
DAF 1KG SAS	0.003	0.044	0.02	0.291	0.499	0.457	0.314	0	0	0.004	0	0	0.062
DAF 1KG EUR	0.12	0	0.029	0.141	0.255	0.26	0.13	0	0	0	0	0	0.003
DAF 1KG AMR	0.003	0	0.058	0.086	0.18	0.184	0.086	0	0.003	0.003	0.003	0.003	0.154
DAF 1KG AFR	0	0.001	0.002	0.011	0.25	0.479	0.014	0	0.002	0.001	0	0	0.002
DAF 1KG All	0.058	0.021	0.159	0.246	0.4	0.451	0.251	0.025	0.036	0.045	0.036	0.036	0.064

[truncated: 9 more sheets: Table 10, Table 11, Table 12, Table 13, Table 14, Table 15, Table 16, Table 17, Table 18]
